# Supplementary material for: Methodologies for Quantitative Systems Pharmacology (QSP) Models: Design and Estimation
Source: PubMed Central journal article supplement — CPT Pharmacometrics Syst Pharmacol. 2017 Jul 11;6(8):496–8. doi: 10.1002/psp4.12206 (PMC5572127; doi:10.1002/psp4.12206), 2017-07-11

# Building Confidence in Modelling and

UNIVERSITY  
*of York*

## Simulation

SimOmics 

Jon Timmis

SimOmics Ltd

University of York

UK

<http://www.simomics.com>

[http://www.york.ac.uk/electronics/staff/jon\\_timmis/](http://www.york.ac.uk/electronics/staff/jon_timmis/)

[jon.timmis@simomics.com](mailto:jon.timmis@simomics.com)

# Crossing Boundaries

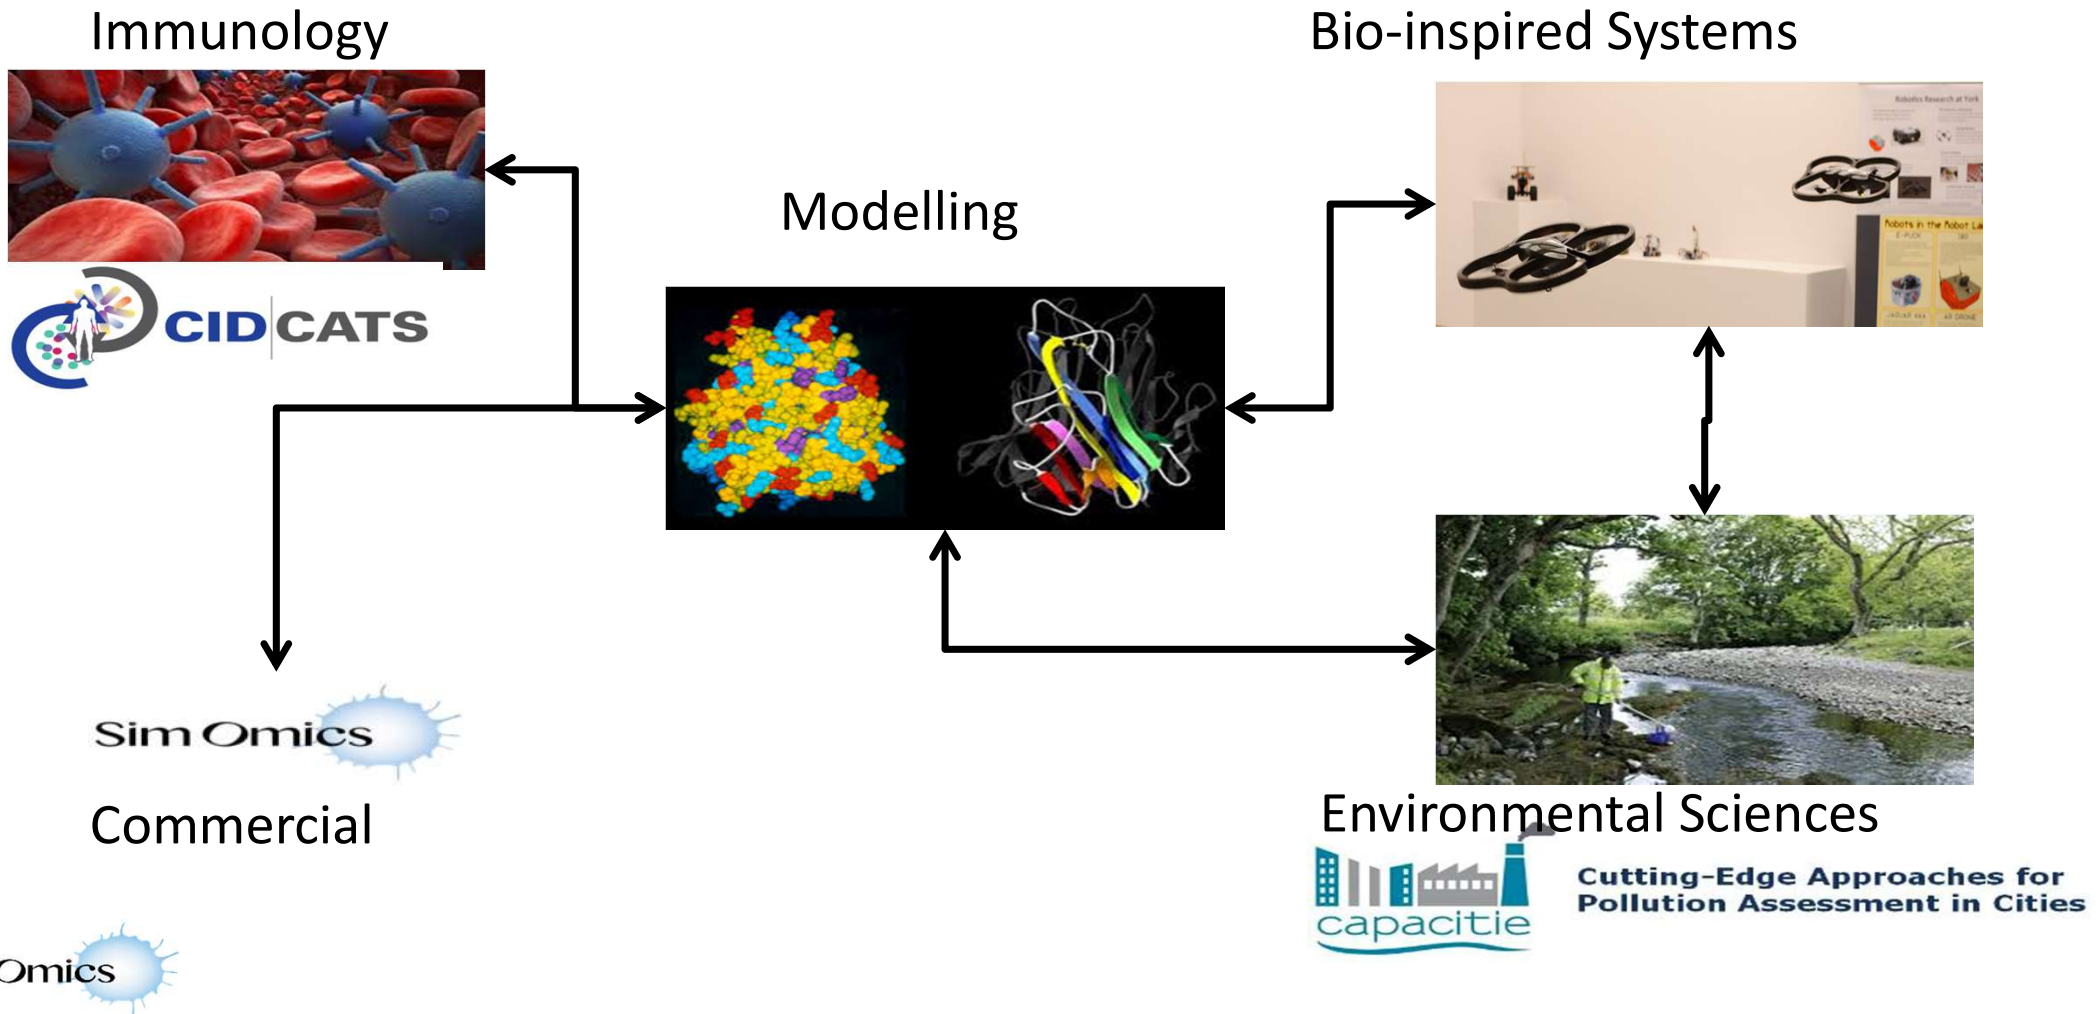

# Critical Engineering

---

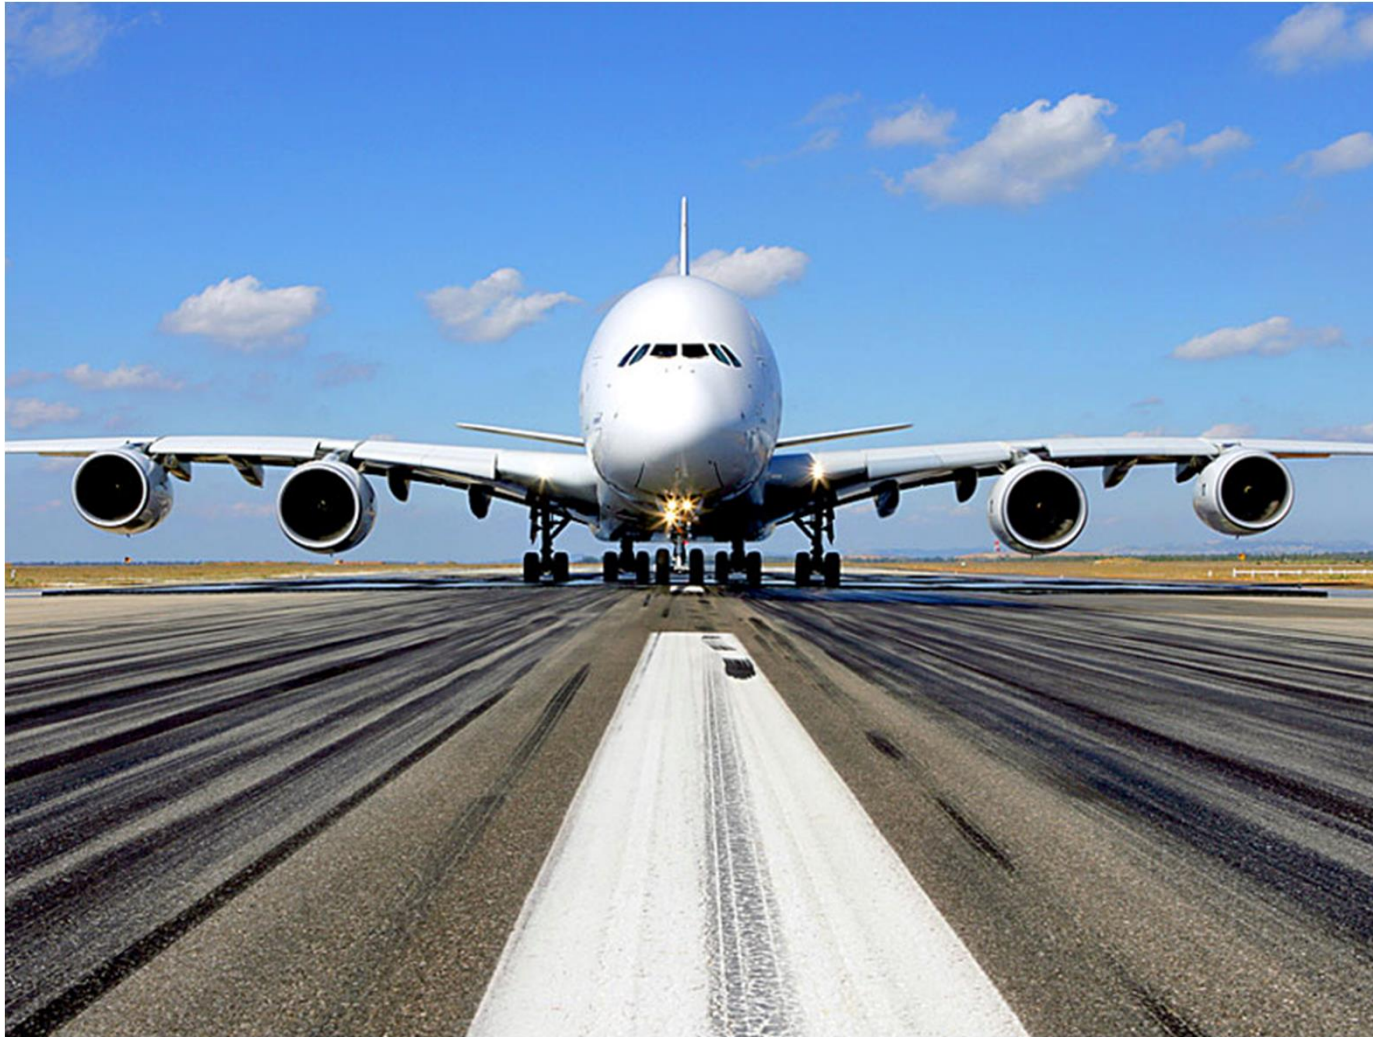

# Evidence, Confidence and Transparency

## Applying critical systems engineering approaches

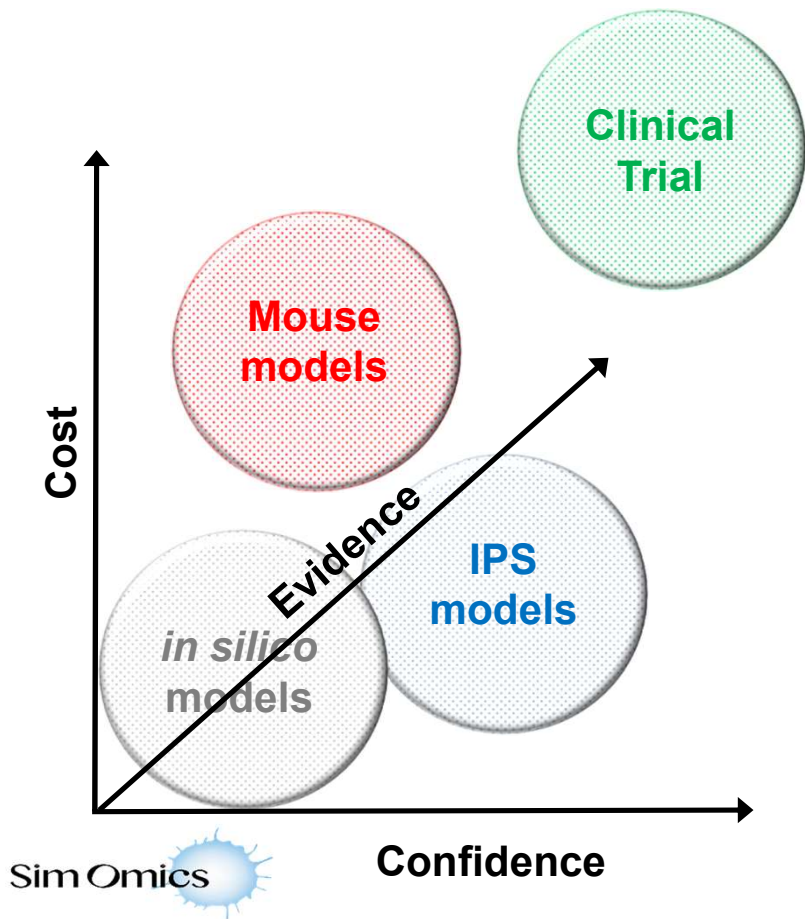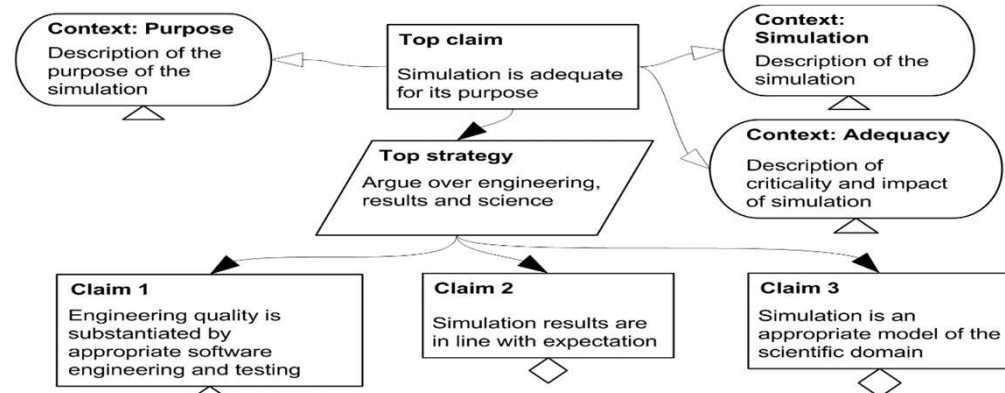

file:///Users/paul/simomics/crackit/evidence-base/evidence.html#

Leishmania Implementation LeishSim Results Arguments Sim Omics

Overview Entities Granuloma Formation

### Kupffer Cell

Specialized macrophages located in the liver lining the walls of the sinusoids.

**Details**

- Number per liver lobule: 10 [source]
- In/out flow rate: 0.34 per hour [source]
- Behaviour: [Granuloma Formation](#)

**Resources**

- Source: [Davies et al](#)
- Source: [Gordon et al](#)
- Implementation: [Kupffer Cell Parameterisation](#)
- Argument: [Kupffer Cell Implementation](#)

| Domain              | Domain Value  |   | Platform            | Platform Value    | Mapping                                  |
|---------------------|---------------|---|---------------------|-------------------|------------------------------------------|
| KC per liver lobule | 10            | M | KC_per_lobule       | 10                | Direct                                   |
| In/out flow rate    | 0.34 per hour | M | KC_in_out_rate      | 1.2 per iteration | Direct, see <a href="#">time mapping</a> |
|                     |               |   | iKC_IL10_production | 9.3 per iteration | Calibrated                               |

# The Spectrum of Leishmaniasis

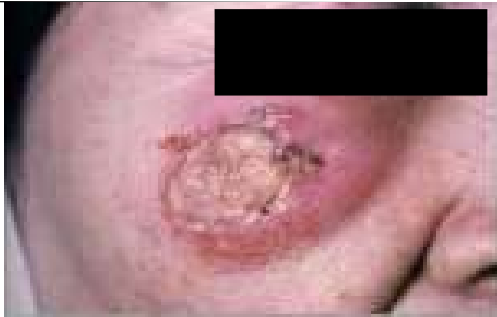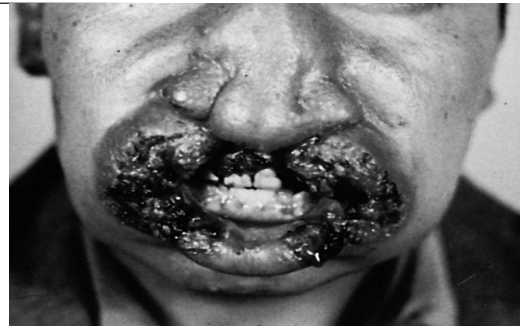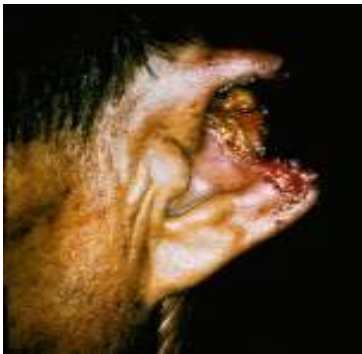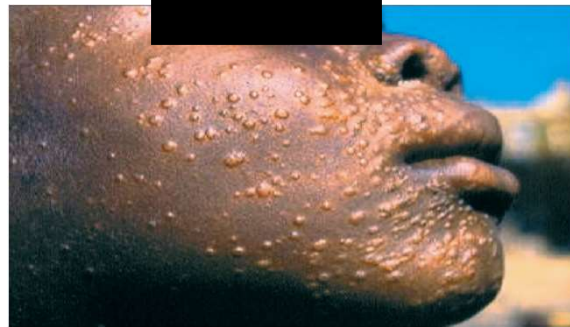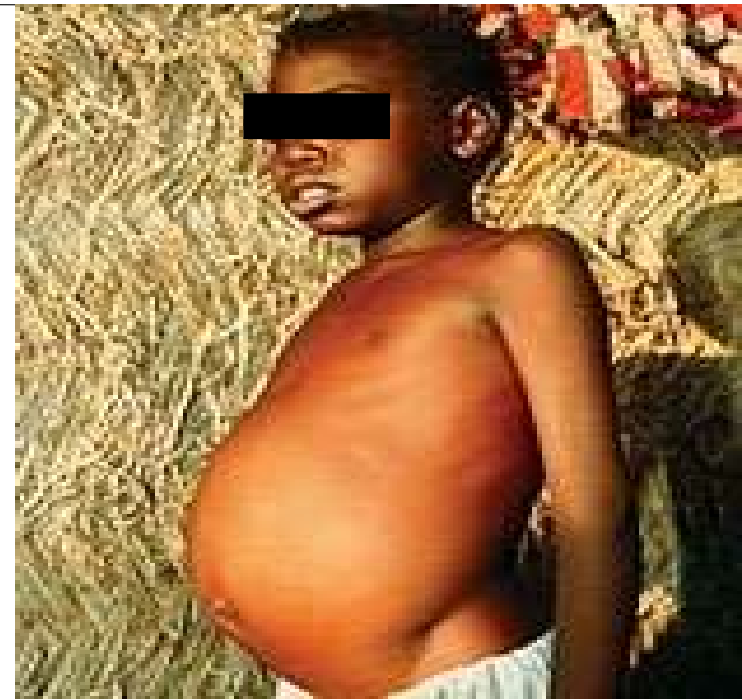

- One of the most neglected tropical diseases, yet ranked 9<sup>th</sup> in analysis of global burden of disease, with an associated mortality amongst parasitic infections second only to malaria
- 14M people infected, ~40,000 recorded deaths annually (3-4-fold under-reported); 350M at risk in 98 endemic countries (incl. the 15 poorest but also some of the more wealthy).

# The Virtual Infectious Disease Research Challenge

---

*To develop a virtual platform that models infection and the host response to pathogen assault for basic research and enhances new target development in infectious diseases.*

CRACK IT

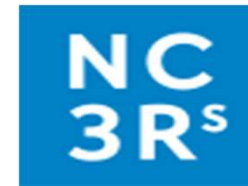

National Centre  
for the Replacement  
Refinement & Reduction  
of Animals in Research

# The Challenge of Leishmaniasis Drug Development

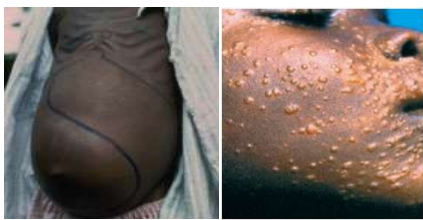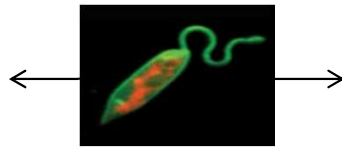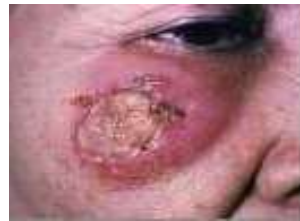

$$+ \left( \text{red square} + \boxed{x_1} \dots \boxed{x_n} \right)$$

*dose, schedule*

>1024 combination therapy options

*Existing approaches*

=

*30,000 animals at LSHTM / York in 10 years  
~40,000 animals per year globally*

***Our goal is to create  
a virtual laboratory, that:***

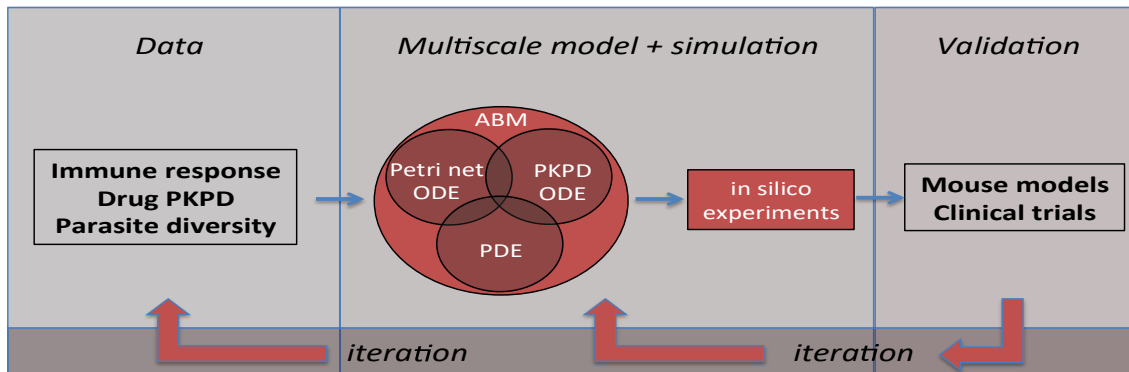

- allows exploration of the drugable space
- provides new mechanistic understanding
- addresses unmet clinical needs
- has broad application to infectious disease
- is evidenced and free to use

and

*delivers maximum 3Rs impact*

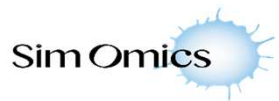

# An Evidencing “process”?

---

- Giving a ***structured method*** to have some confidence in the use of models and simulations
- Consider all activities:
  - ***documenting, building, using, and reasoning*** about models and simulations



# Stakeholder Engagement

---

- What do you simulate?
- When do you need a domain expert?
- How much do you trust a DE's opinion?
- Managing expectations
  - What can models actually do
- Domain differences
- How much time does it take to do something?
- Speaking the same language

# What is your Purpose?

---

- To what extent did you know what you were going to investigate before you started simulating?
- Use simulation to ask a specific question?
  - Or general exploration?
- How do you record/document/communicate purpose?
- Bespoke tools vs generic frameworks

# Where can it go wrong?

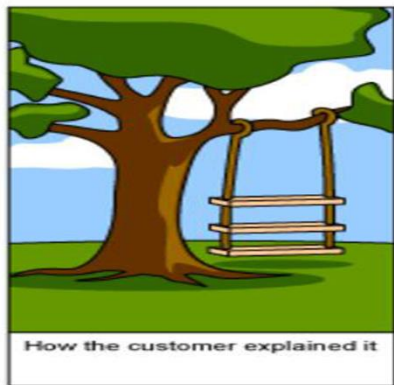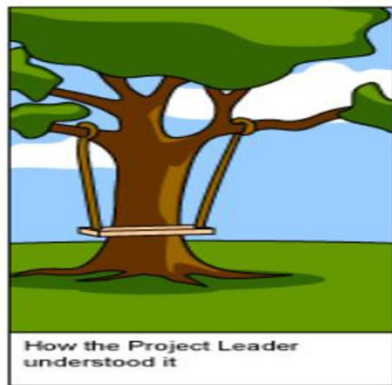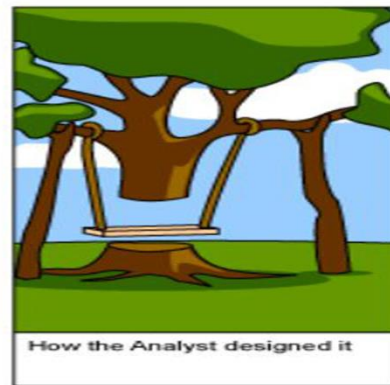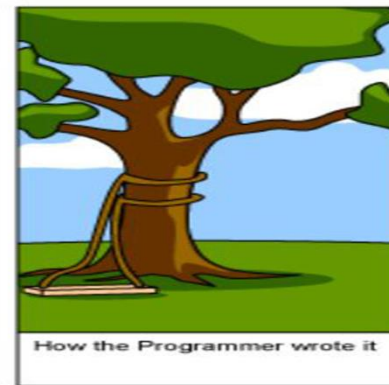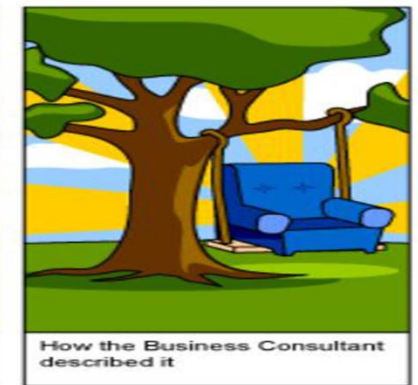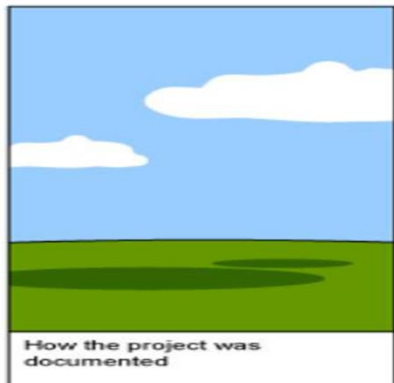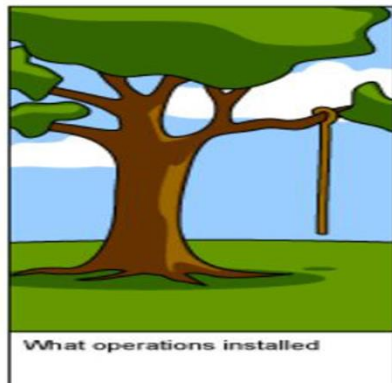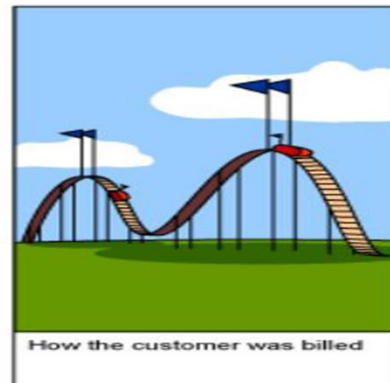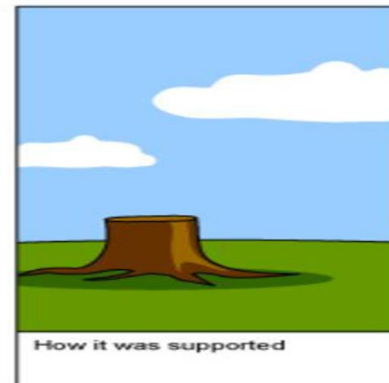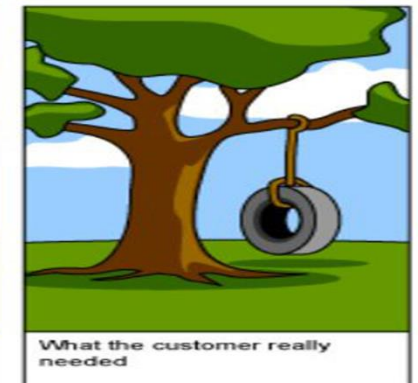

# Terminology: Confidence

---

*Simulation outputs adequately  
represent the domain*

- Problem and purpose specific
- Not currently quantified
- Not absolute
- Open to interpretation

# Qualifying Confidence

---

- What is “confidence” to you?
  - how much do you need?
- Do you measure it?
- Impact and criticality
- Use of *evidencing*

# Some questions to think about

---

- What constitutes acceptable evidence? (quantitative versus qualitative evidence, role of expert opinion)
- What types of evidence do people deal with?
- How do they find evidence? What sources they use?
- How do they decide whether evidence is generalizable?
- How do they rate confidence in evidence, and deal with uncertainty?
- What are the different needs from your stakeholders?
- Do you care more about the biology or also the structure of the model and how it was built.
- What are the best ways to visualise evidence?
- If you could identify one key piece of evidence to convince you of the value of a model – what would it be?

# Process for Modelling

---

- **Simulation based scientific research** based around following components:

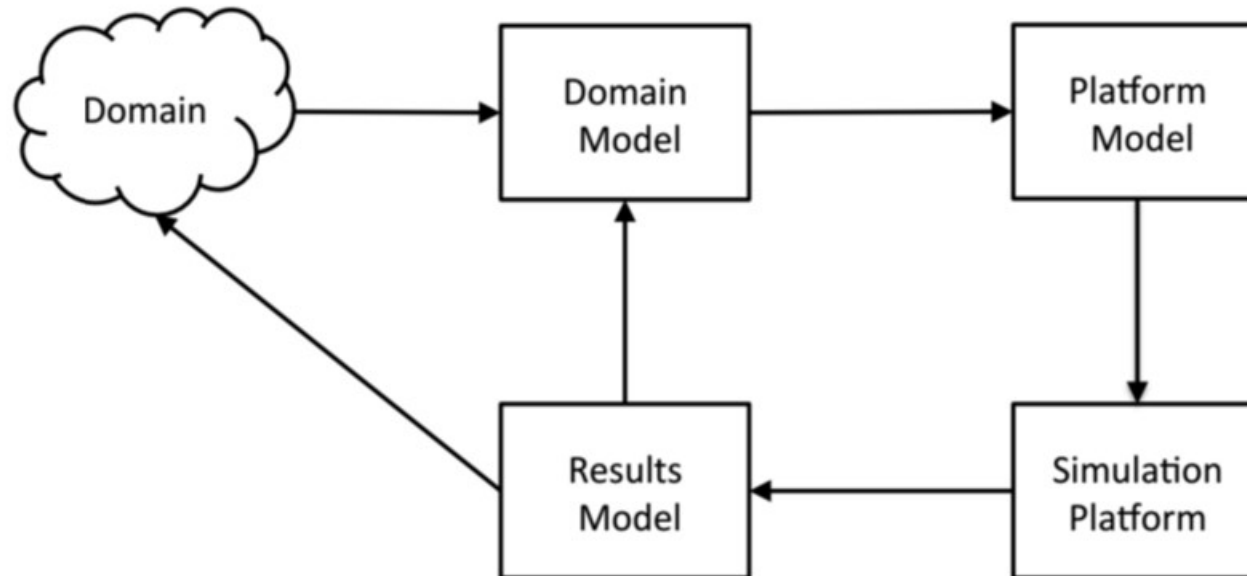

- Each model is for one explicit purpose

# Developing a research context diagram

---

Identify observable phenomena

Granuloma formation around Kupfer cells

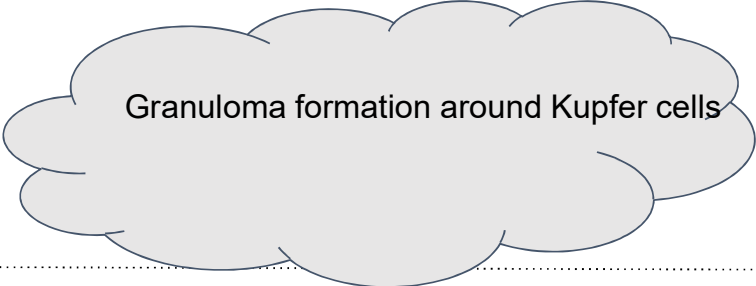

---

State hypothesis of how observable phenomena manifest

<<Aggregation of leucocytes around Infected Kupfer cells>>

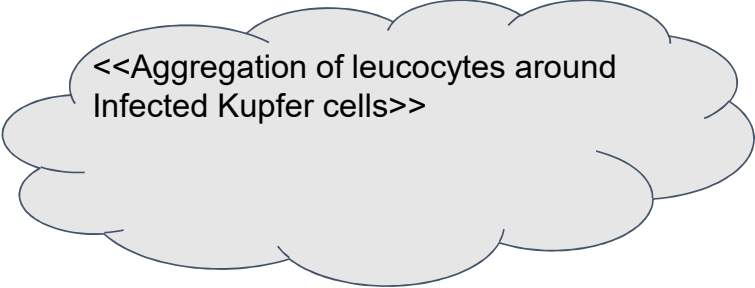

---

Identify actors that contribute to hypothesis and how they interact

Kupfer cell

CD4+





# Communicating Model and Results

---

- How do you convince people that your results are representative?
  - **Argumentation**
- Are the traditional research outlets adequate for modern day simulation-based research
  - How do you publish the model? 85 pages of SI?

# Documentation

---

- Creating the core model components provides an explicit structure for documentation and communication
- Document
  - What goes into the boxes
  - How you **transition** between the boxes

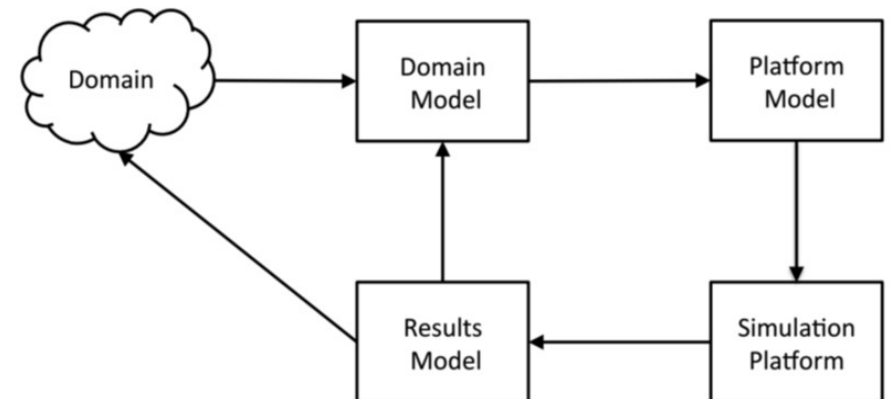

# Argument-based Validation

---

- Inspired by validation of safety-critical systems
- Stringent analysis of compliance to a set of requirements:
  - Each implementation step is validated
  - Reasoning behind inclusion/exclusion of feature/assumption provided
  - Evidence given as to why this conclusion drawn

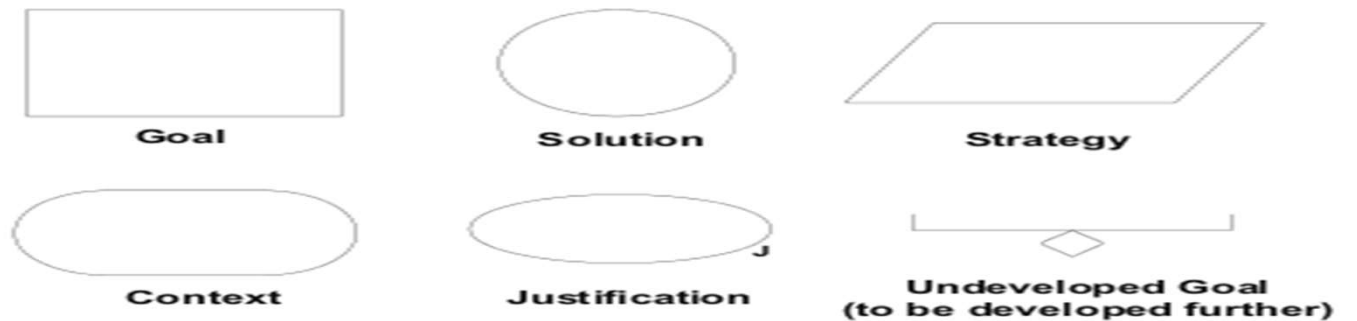

# Developing a claim

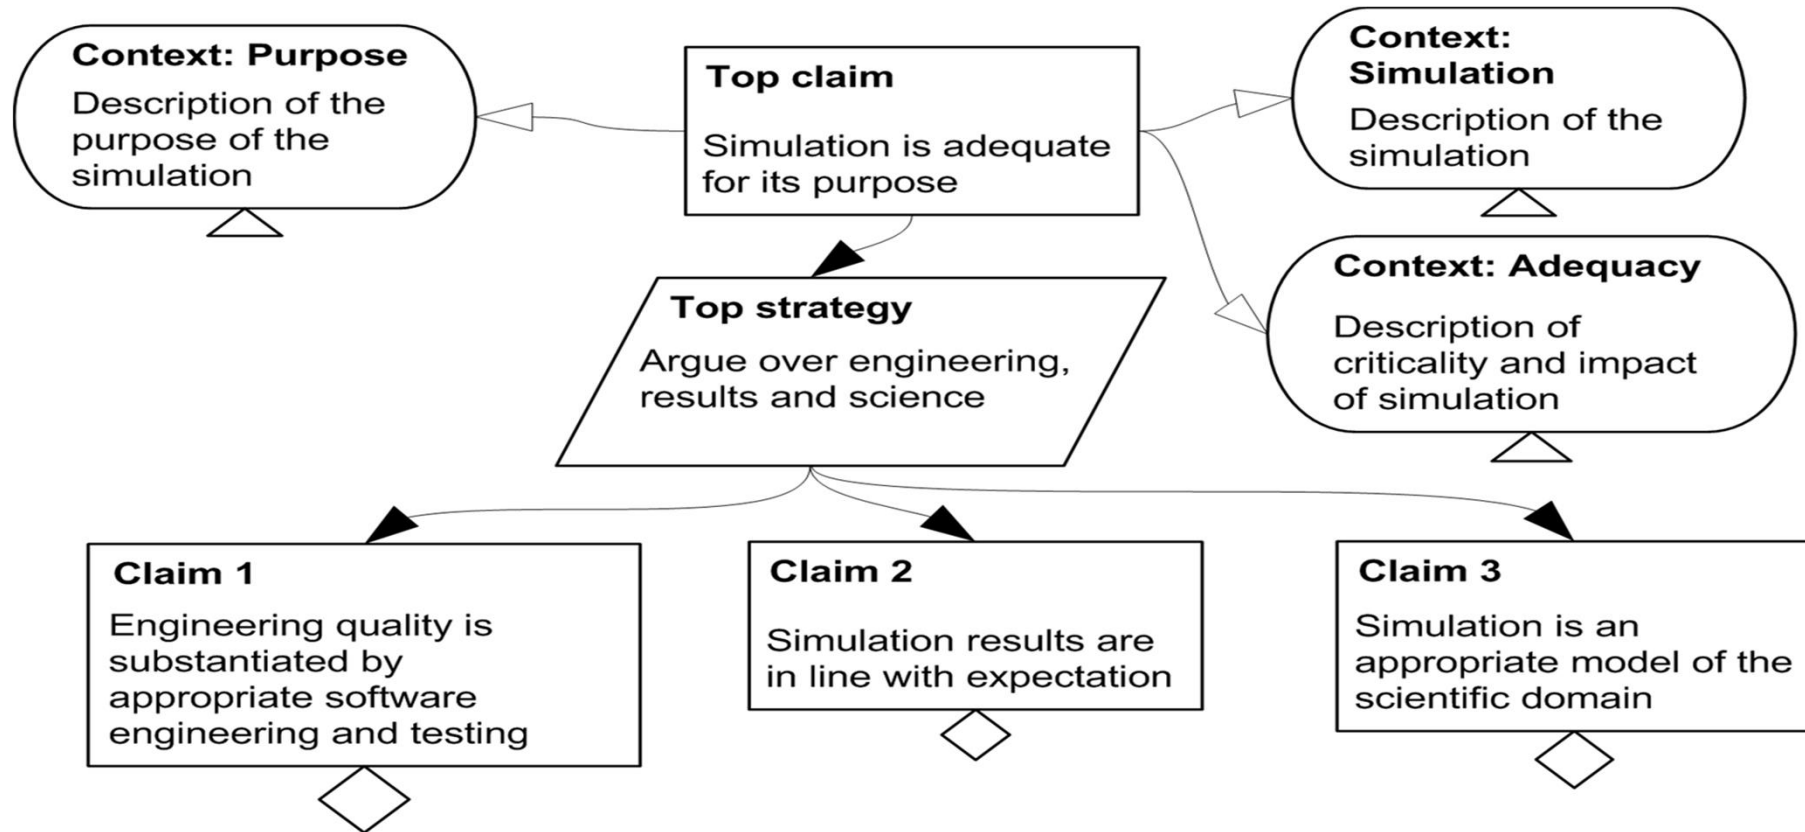

# Process for developing a claim

1. Assessing the biological evidence
2. Justify model engineering decisions
3. Justify model biological assumptions
4. Justifying engineering abstractions
5. Justifying experimental design
6. Justifying the simulation analysis process

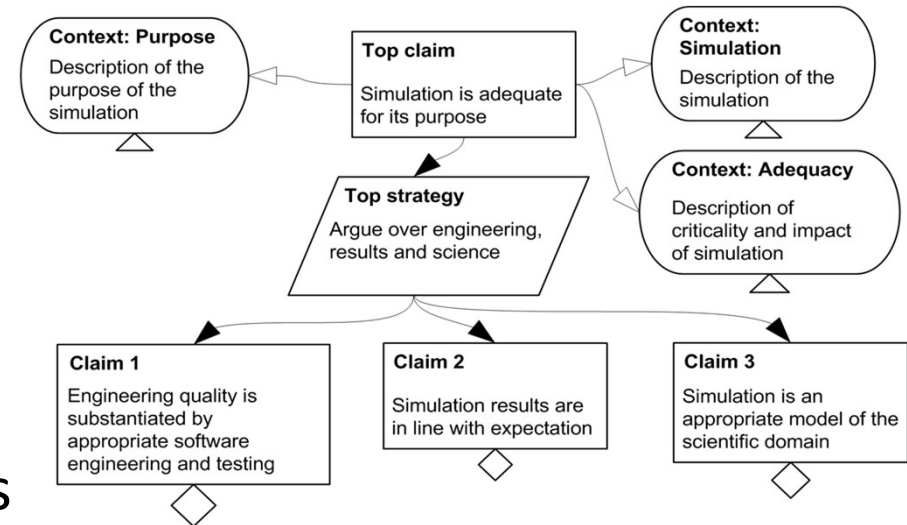

# 1: Assessing Biological Evidence

---

- Assess scope of available data
- Expert opinion
- What understanding is currently lacking
- For each, need to establish a “goal”
  - Argue that “the data shows an adequate representation of observed cell behaviour”
  - Strategy to “examine the methodology used to capture the data and the time points the data was collected”
  - Each strategy might be linked to evidence nodes

## 2: Justifying Model Engineering Decisions

---

- Many techniques to implement model could be decided upon
- Need to justify engineering decisions taken
- Could argue that “an agent-based modelling paradigm is most suitable for addressing the key research question”
- A strategy could be “examine the need for heterogeneous populations embedded in a representative space”

# 3: Justifying Model Biological Assumptions

---

- Step 1 will highlight gaps in biological understanding
- Argue that each assumption is an acceptable representation of the biology
  - Need to clearly define what is acceptable



# 4: Justifying Engineering Abstractions

---

- Might not be possible to capture the complete biological system
  - abstractions are necessary that could have a major impact on the model
- Might develop an argument, “it is not necessary to represent an entire lymph node, but only a portion of the lymph node”
- Then a strategy might be to “examine the effect of reducing the amount of represented space on the emergent behaviours of the system”

# 5: Justifying Experimental Design

---

- Prior to any experiments being undertaken establish necessary experiments
- Argue that “in silico experiments being undertaken are necessary to address the research question”
- With a strategy that “examines the use of selected experimental protocol”

# 6: Justifying the Simulation Analysis Process

---

- Results need to be interpreted in light of
  - the scope of the designed simulation
  - the biological system being studied
- Draw conclusions from simulation-derived results, utilising evidence compiled in steps 1 - 5

# Integrated tools to explore evidence

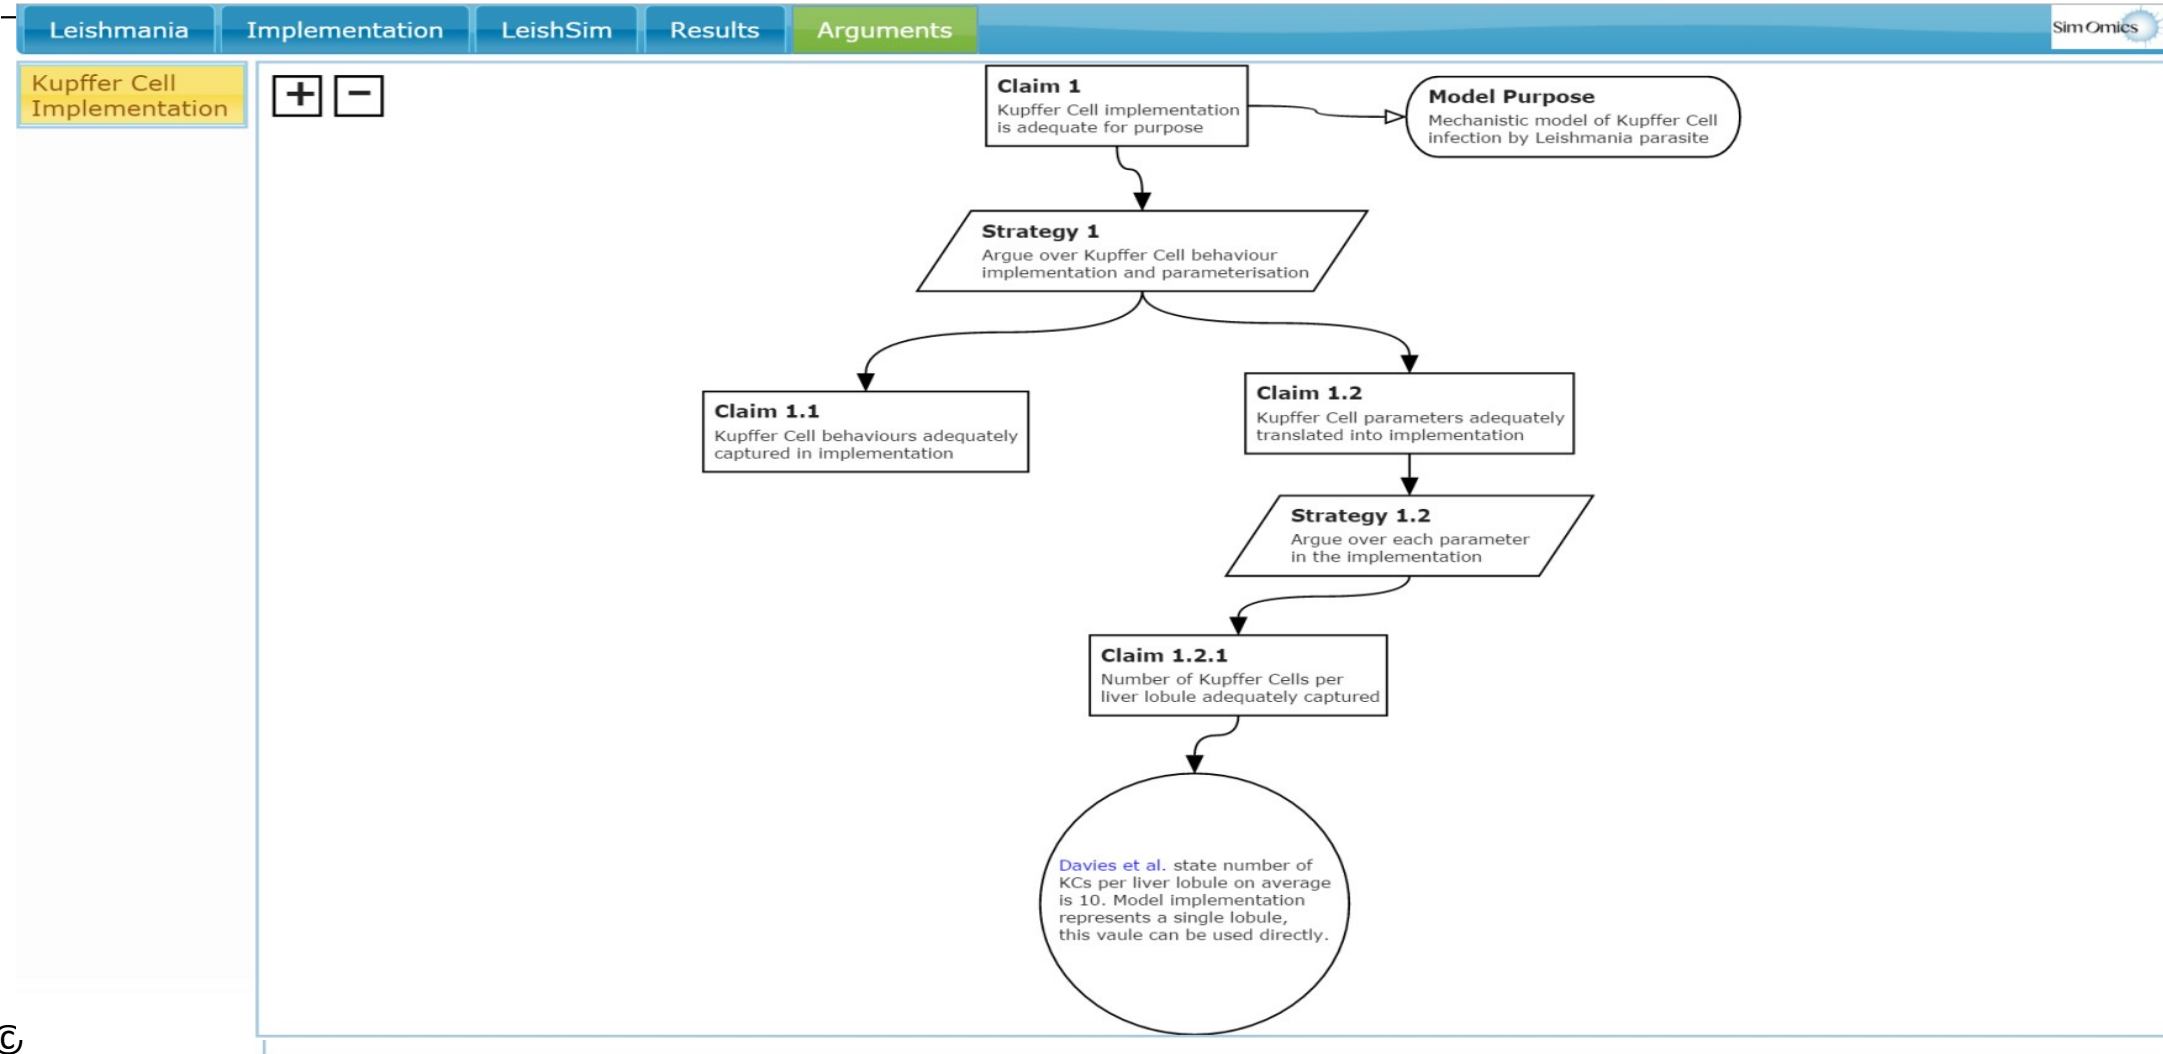

# Summary

---

- Transparency of rationale, design and implementation is important
- Better ways of exploring such rationale can be developed
- Potential for better stakeholder engagement and understanding

# More information

## Contact:

Jon Timmis – [jon.timmis@simomics.com](mailto:jon.timmis@simomics.com)

Mark Coles – [mark.coles@simomics.com](mailto:mark.coles@simomics.com)

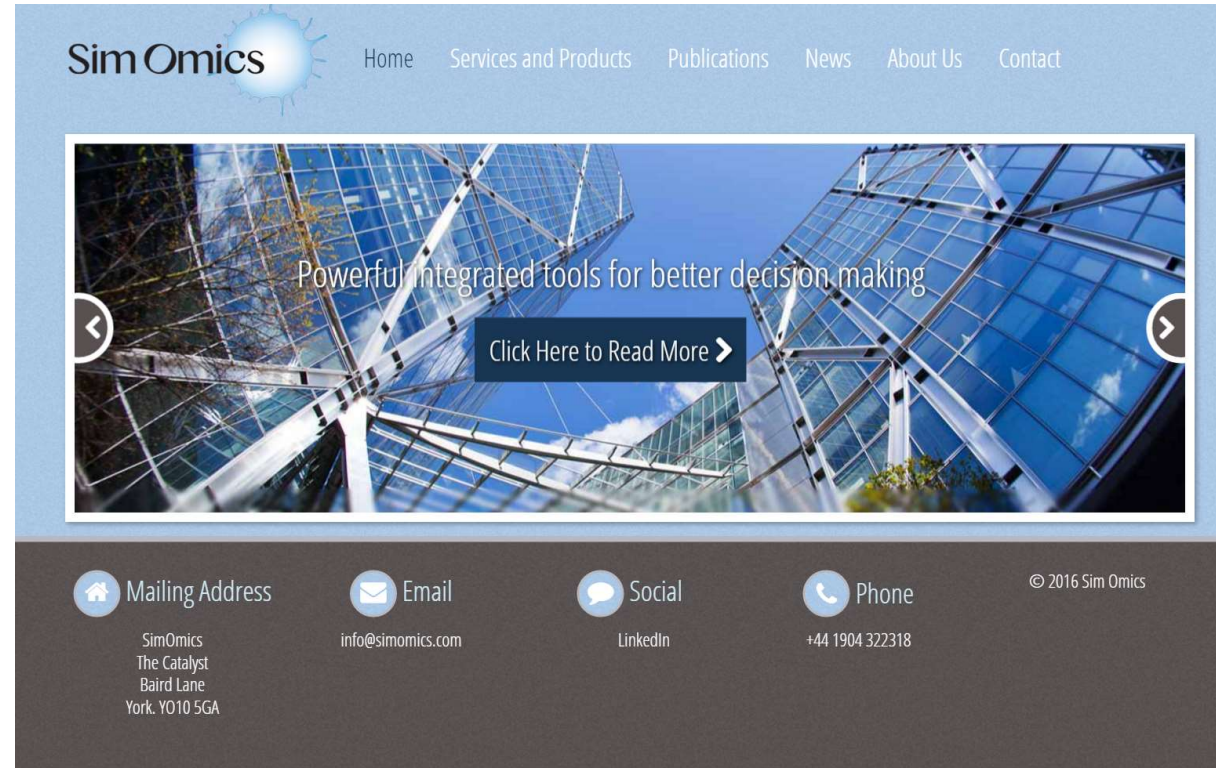

The screenshot shows the SimOmics website homepage. At the top left is the SimOmics logo, a blue sun-like icon with the text "SimOmics". To its right is a navigation menu with links for "Home", "Services and Products", "Publications", "News", "About Us", and "Contact". Below the navigation is a large banner image of a modern glass skyscraper. Overlaid on the banner is the text "Powerful integrated tools for better decision making" and a dark button with the text "Click Here to Read More". Below the banner is a dark footer area containing contact information: "Mailing Address" (SimOmics, The Catalyst, Baird Lane, York, YO10 5GA), "Email" (info@simomics.com), "Social" (LinkedIn), and "Phone" (+44 1904 322318). A copyright notice "© 2016 Sim Omics" is in the bottom right corner.

<http://www.simomics.com>

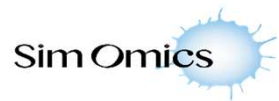

Supplement: PSP4-6-496-s003.pdf [file PSP4-6-496-s003.pdf]
