# Supplementary material for: Methodologies for Quantitative Systems Pharmacology (QSP) Models: Design and Estimation
Source: PubMed Central journal article supplement — CPT Pharmacometrics Syst Pharmacol. 2017 Jul 11;6(8):496–8. doi: 10.1002/psp4.12206 (PMC5572127; doi:10.1002/psp4.12206), 2017-07-11

# Success factors in the implementation of systems pharmacology models during R&D

**Balaji Agoram, Ph.D**  
Director, Clinical Pharmacology  
MedImmune, Mtn View, CA

Strictly Confidential

*It was six men of Indostan  
To learning much inclined,  
Who went to see the Elephant  
(Though all of them were blind),  
That each by observation  
Might satisfy his mind*

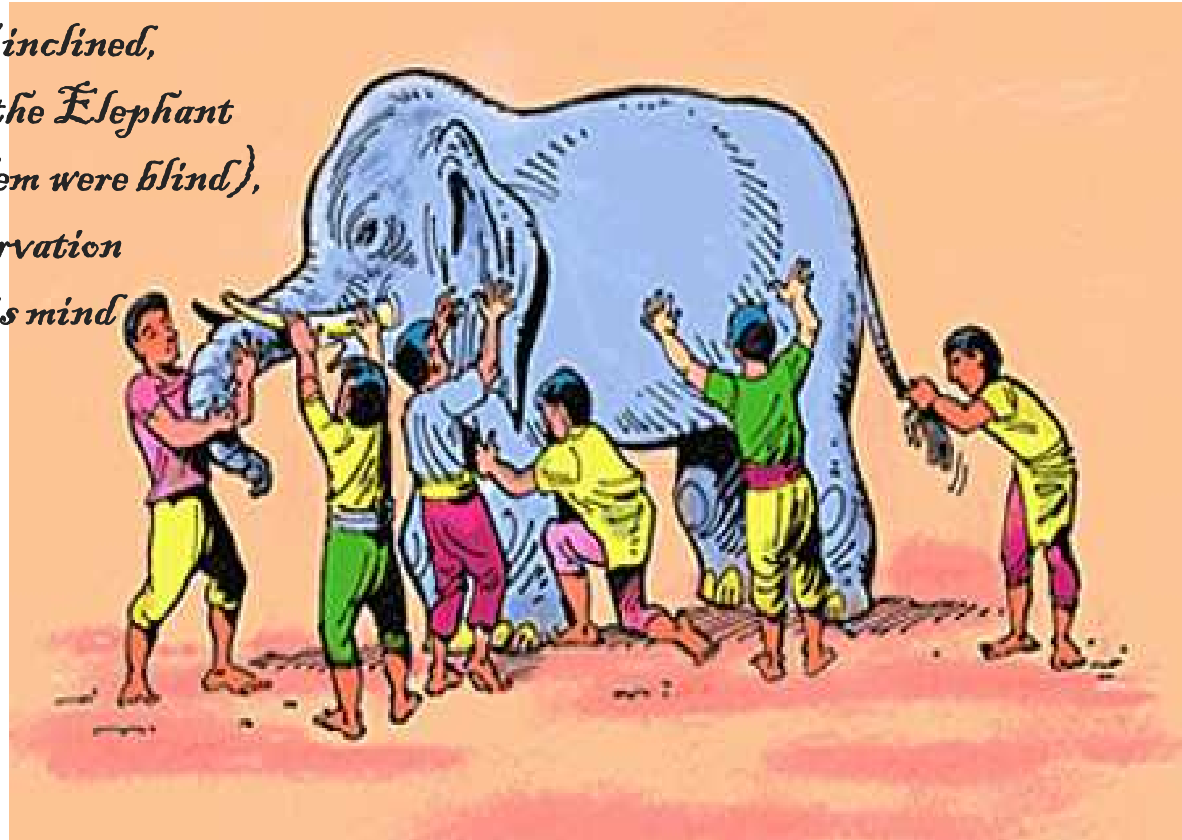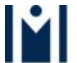

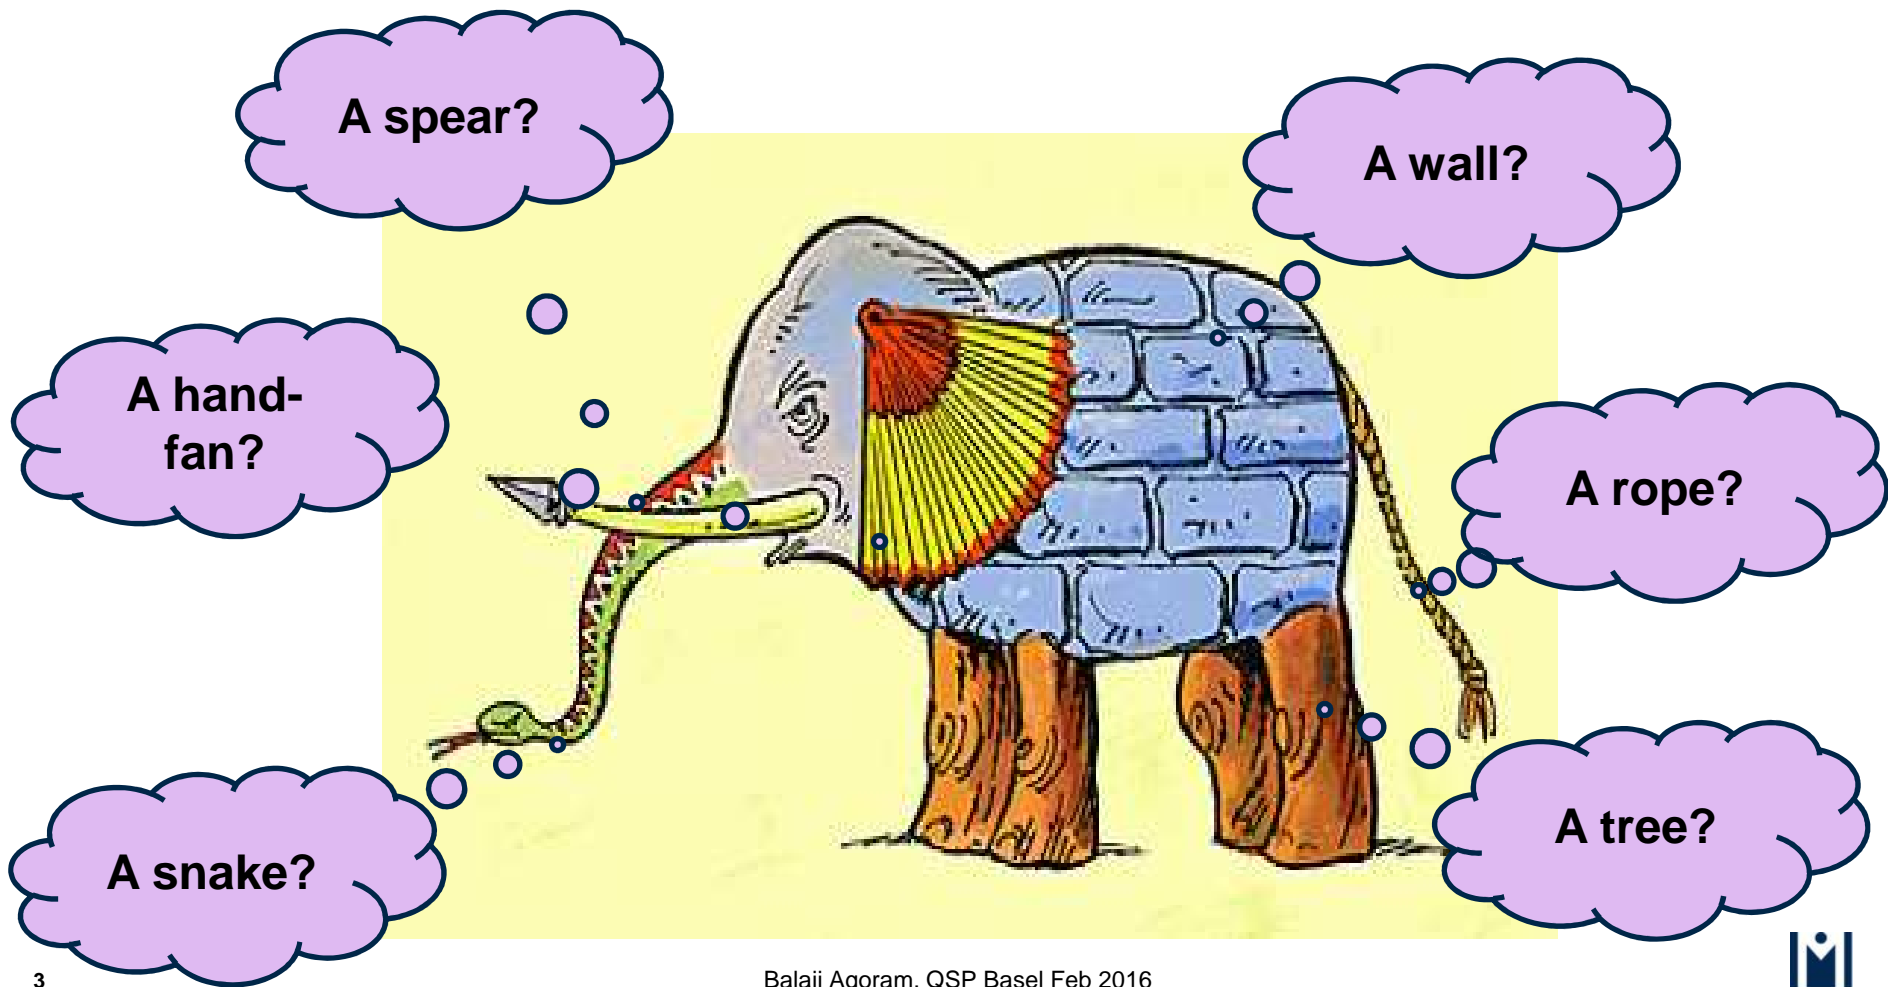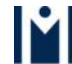

# How are these models used within typical industry?

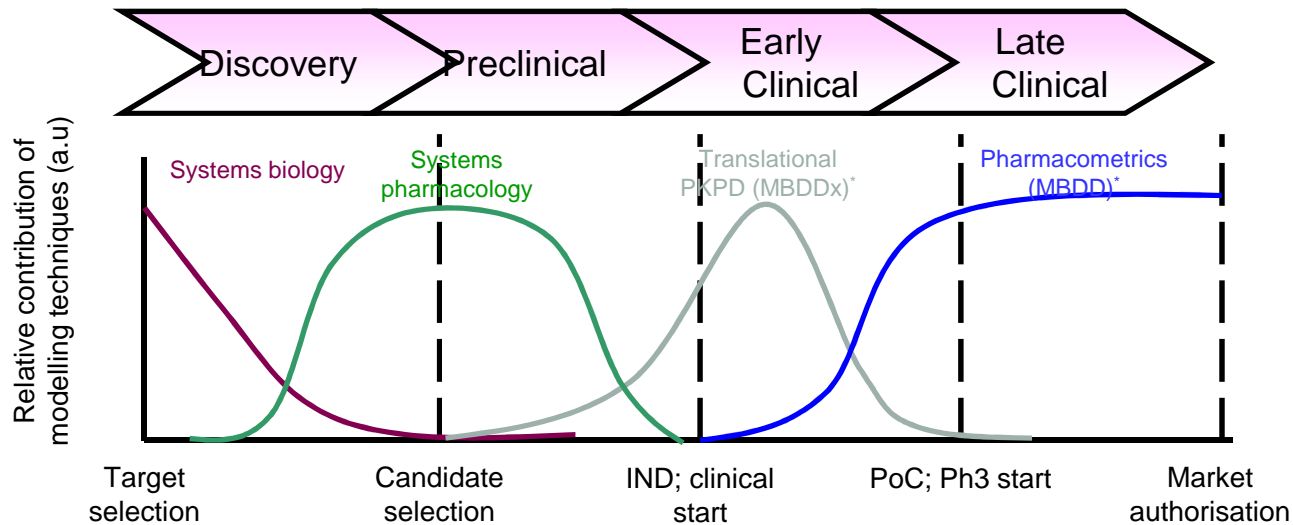

While standard PKPD models are *de rigueur* in pharma/biotech today, systems models is perceived to be an unmet research need\*

\*See Identifying CDER's Science and Research Needs Report July 2011

\*MBDD= Model-based drug development

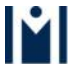

# Successful QSP effort could be defined in many ways

---

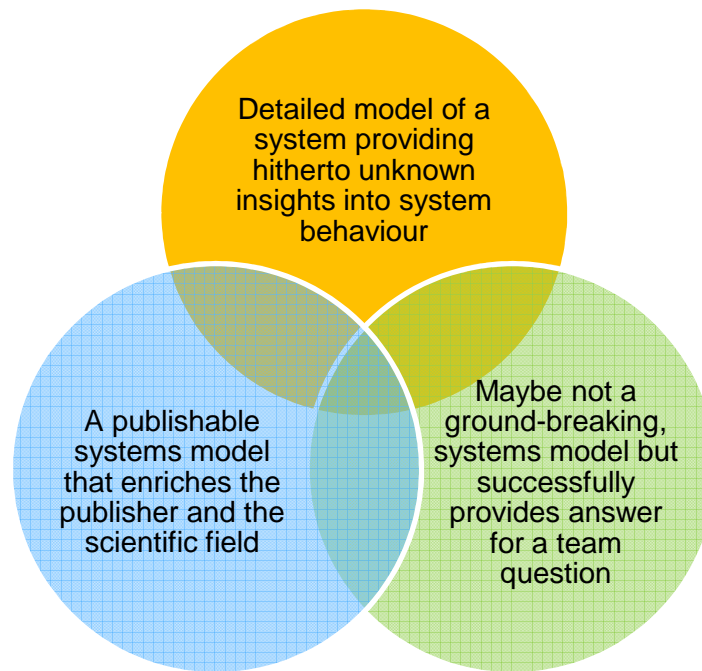

# For the purposes of this presentation, success is...

---

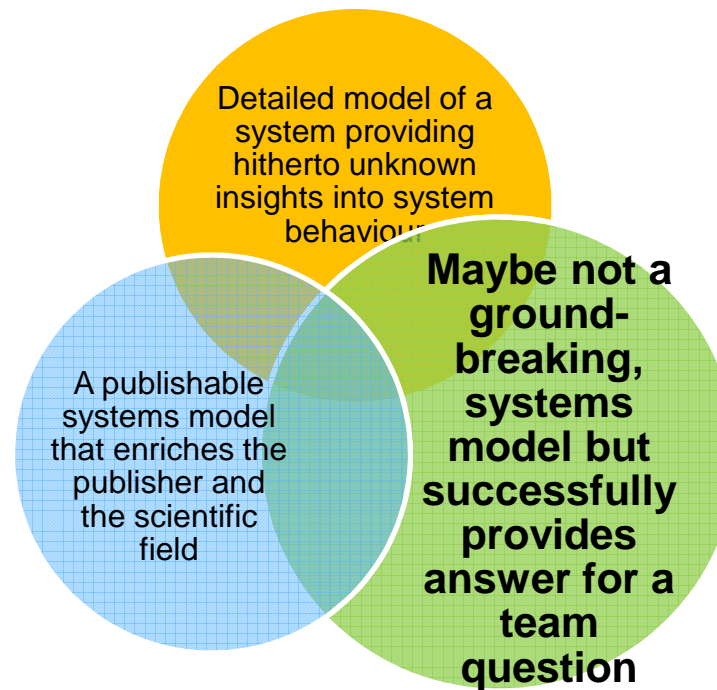

# Successful QSP implementation consists of three successful steps

---

Asking the  
“right”  
question

Managing the  
modelling  
process

Clear  
communicatio  
n of the  
results

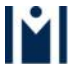

# “Asking the right question is half the answer” – (must be a proverb somewhere)

---

|                                  |                                                                                                                                                                              |
|----------------------------------|------------------------------------------------------------------------------------------------------------------------------------------------------------------------------|
| Specific and verifiable          | Quantifiable, resulting in a tractable problem<br>Roadmap can be created to check answer is reached<br>Model results can be verified with reasonable investment (preferable) |
| Supported by data                | Knowledge needs to exist regarding the problem at hand – preliminary exploratory analysis                                                                                    |
| Alternative methods are not easy | Cheaper animal models, in vitro testing, etc.                                                                                                                                |

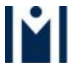



# Identification of the optimal GLP1/glucagon balance in a dual agonist

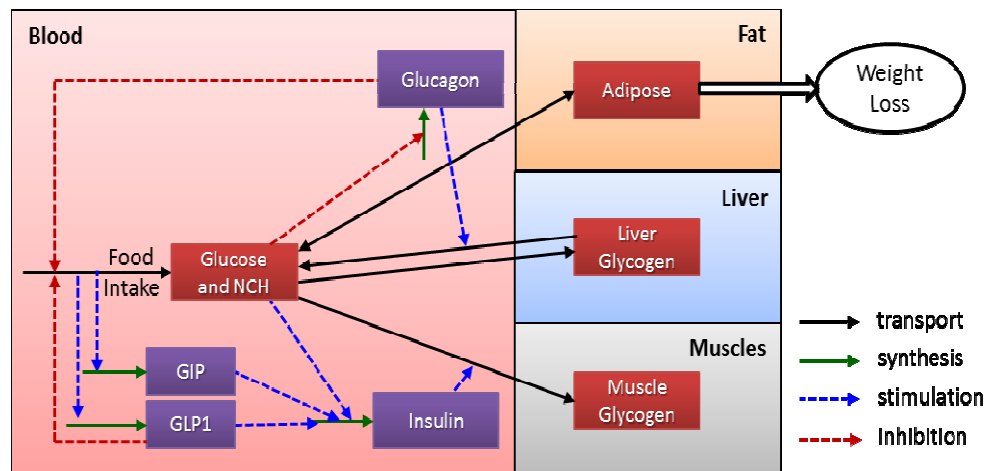

Agoram, et al. ADA 2015

- We hypothesised that in order to guide the design of optimised multi-pharmacology incretin-like molecules, a detailed organ/organism level understanding of the action of the incretins on weight regulation and glucose control was necessary
- We developed a systems pharmacology model to enable this understanding using a modular approach and evaluated its performance using a range of literature-reported data

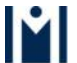

# Example: Affinity goals for a GLP-1/glucagon dual agonist (2/2)

Model predicted weight loss and FPG after GLP-1 agonist treatment in T2D patients

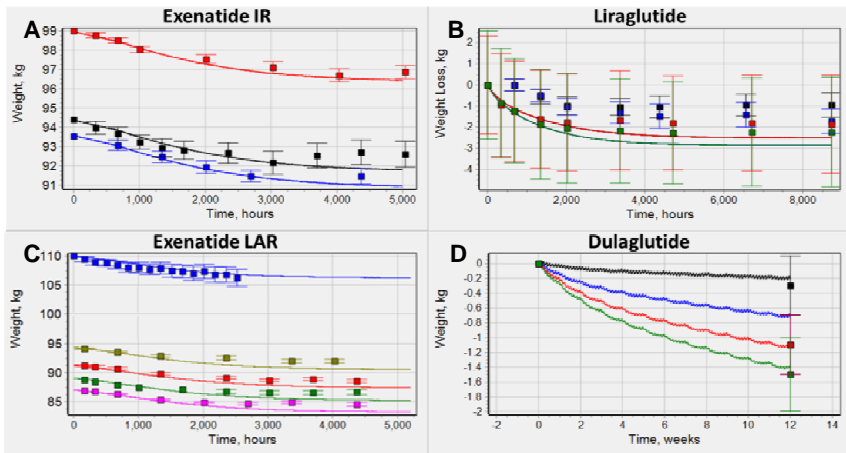

Verification of dual agonist predictions: Simulated vs. observed effects of oxyntomodulin on weight and FPG in obese (non T2D) volunteers

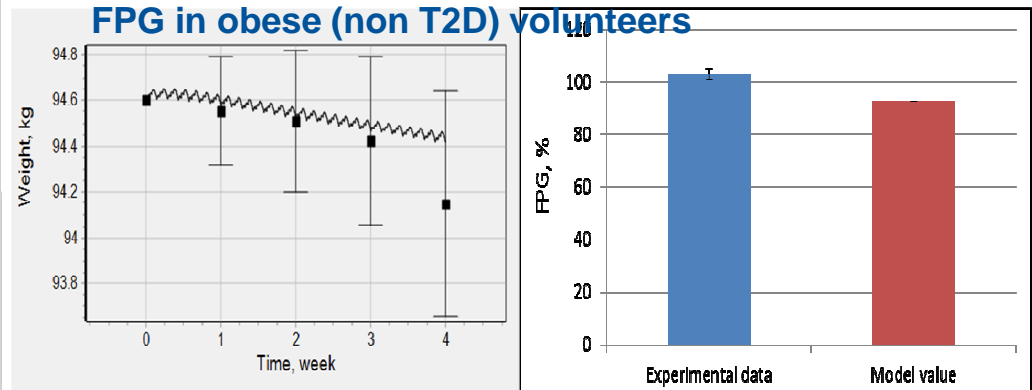

# How does this example demonstrate success factors?

| Specific and verifiable          | Quantifiable, resulting in a tractable problem<br>Roadmap can be created to check answer is reached<br>Model results can be verified with reasonable investment (preferable) | √ |
|----------------------------------|------------------------------------------------------------------------------------------------------------------------------------------------------------------------------|---|
| Supported by data                | Knowledge needs to exist regarding the problem at hand – preliminary exploratory analysis                                                                                    | √ |
| Alternative methods are not easy | Cheaper animal models, in vitro testing, etc.                                                                                                                                | √ |



# Managing simplicity vs complexity during model development...

---

|                                                                    |                                                                                                     |
|--------------------------------------------------------------------|-----------------------------------------------------------------------------------------------------|
| Start with the simplest possible model to test/generate hypothesis | Formal statement of hypothesis (see next presenter)<br>Supported by project physician and biologist |
| Add complexity only if supported by data and if necessary          | Sensitivity analysis                                                                                |
| Check roadmap from question to answer                              | Ensure unnecessary additions are avoided                                                            |

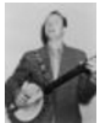

“Any darn fool can make something complex; it takes a genius to make something simple.”  
– Pete Seeger

“Everything should be made as simple as possible, but not simpler.”  
[Albert Einstein](#)

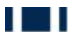

# Systems model to understand action of 5Lipoxygenase-inhibitors

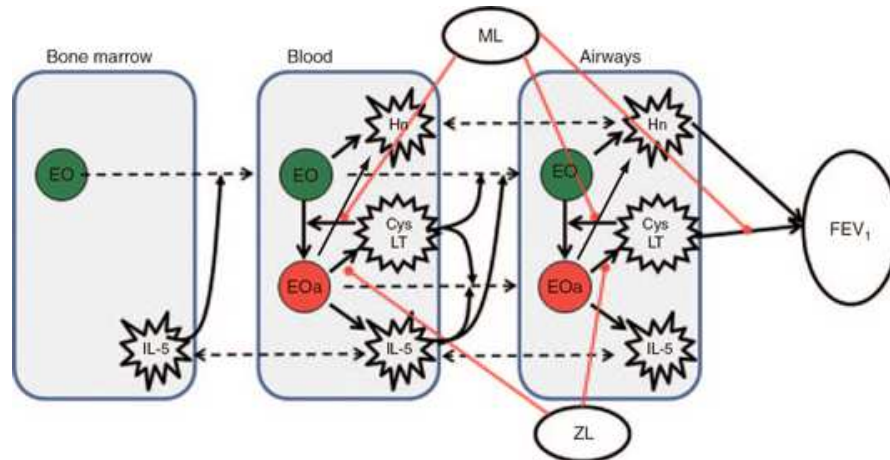

Agoram, Demin, et al CPT:PSP 2013

Balaji Agoram, QSP Basel Feb 2016

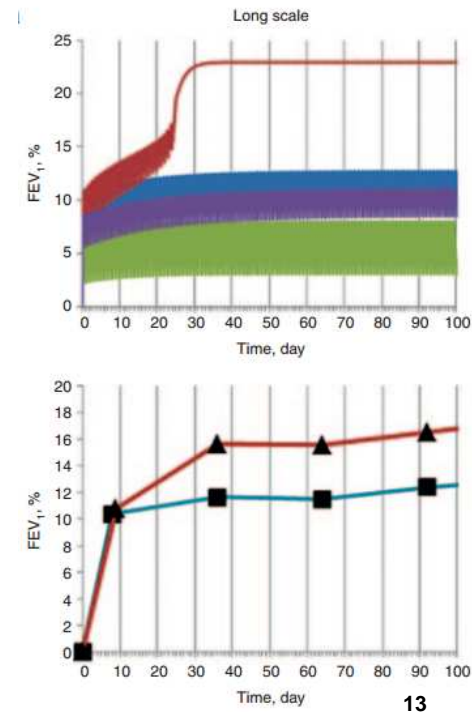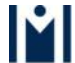

# Did the model really need to be that complex?

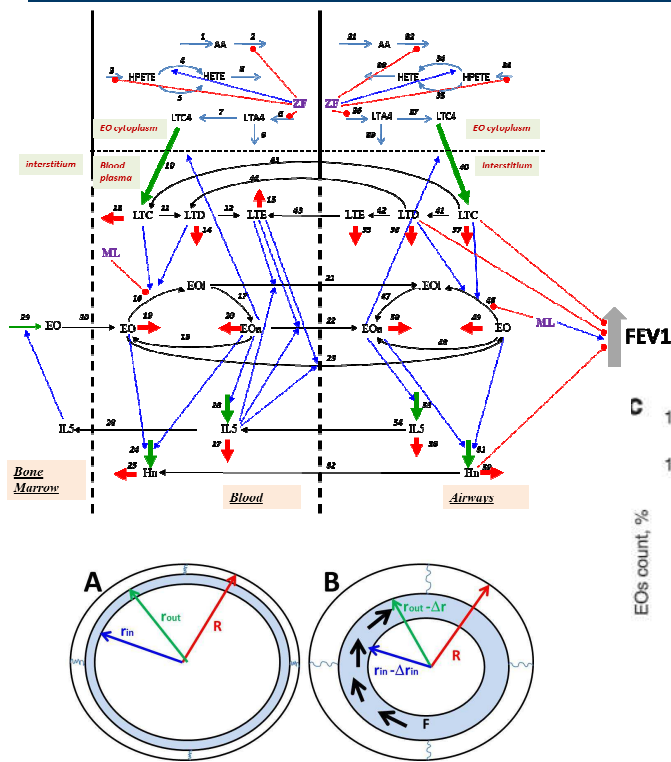

- Extra details on montelukast were added to the model for verification purposes
- Detailed biophysical model was added to link active cytokine levels to changes in FEV<sub>1</sub> through bronchus volume changes

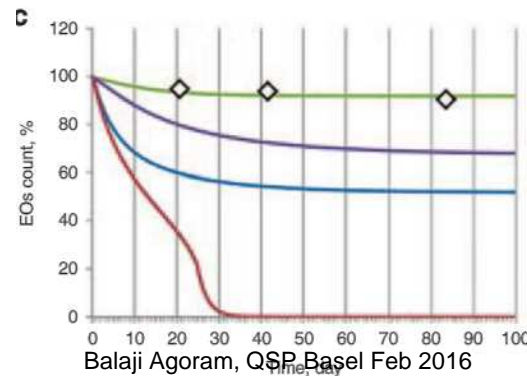

Agoram, Demin, et al CPT:PSP 2013

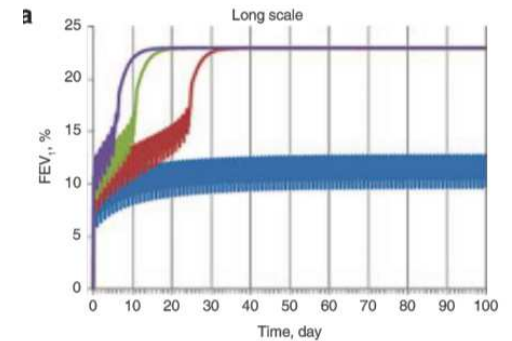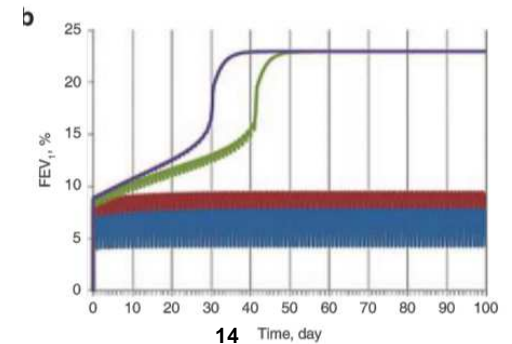

# Model communication should include tabled assumptions

**Table 1** Description of available experimental data and facts

| Assumption/fact                                                                                                                                                                                                                                                    | References  |
|--------------------------------------------------------------------------------------------------------------------------------------------------------------------------------------------------------------------------------------------------------------------|-------------|
| Eosinophils and mast cells are the key cells mainly responsible for bronchoconstrictors production                                                                                                                                                                 | 16,18,44    |
| Cysteinyl leukotrienes C4, D4, and E4 (LTC4, LTD4 and LTE4), histamine, and prostaglandins D2 and F2 are key bronchoconstrictors responsible for excessive bronchoconstriction in asthmatic patients. Among leukotrienes, LTD4 is the strongest bronchoconstrictor | 45          |
| IL-5, granulocyte-macrophage colony-stimulating factor, and stem cell factor are main cytokines governing eosinophils and mast cells maturation                                                                                                                    | 16,46       |
| Binding of LTD4 and LTC4 to cysteinyl leukotriene receptors 1 and 2 (CysLT1R and CysLT2R) is able to transform inactive eosinophil to activated eosinophil                                                                                                         | 44          |
| Only activated eosinophils are responsible for high production of IL-5 and LTC4                                                                                                                                                                                    | 44          |
| Life span of activated eosinophil is larger than that of inactivated eosinophil                                                                                                                                                                                    | 47          |
| Mast cells are able to produce histamine spontaneously. Mast cells of asthmatics produce more histamine than those of healthy subjects                                                                                                                             | 16          |
| Eosinophils are able to modulate histamine production in mast cells via excretion of eosinophil cationic protein (ECP). Increase in ECP results in degranulation of mast cells                                                                                     | 16          |
| The key chemoattractants driving eosinophils migration are LTE4 and IL-5                                                                                                                                                                                           | 31,34,45,48 |
| Increase in LTE4 concentration results in significant accumulation of eosinophils in airways from blood                                                                                                                                                            | 18,34,45    |
| Increase in IL-5 blood plasma level leads to elevation of eosinophils trafficking from blood plasma to airways                                                                                                                                                     | 31,48       |
| ASM contraction is governed by intracellular calcium level                                                                                                                                                                                                         | 45          |
| Intracellular calcium level depends on concentration of bronchoconstrictors (LTD4, LTC4, and histamine)                                                                                                                                                            | 49          |
| Binding of LTD4 and LTC4 to CysLT1R and CysLT2R of ASM and binding of histamine to H <sub>1</sub> receptor results in increase in intracellular Ca <sup>2+</sup> concentration                                                                                     | 49,50       |

ASM, airway smooth muscle; IL-5, interleukin-5.

Agoram, Demin, et al CPT:PSP 2013

Balaji Agoram, QSP Basel Feb 2016

15



# Systems model development is a community activity...

---

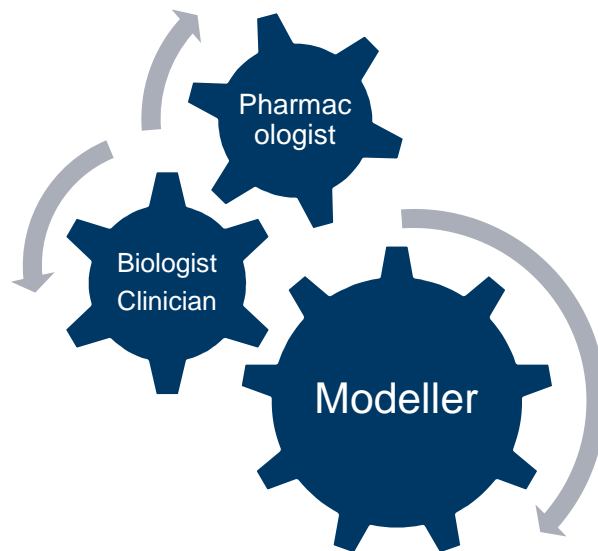

Vs

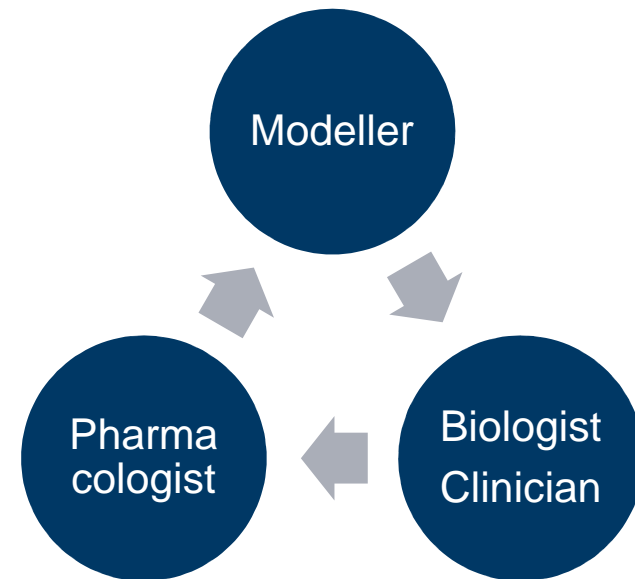



# Communication of model should be succinct...

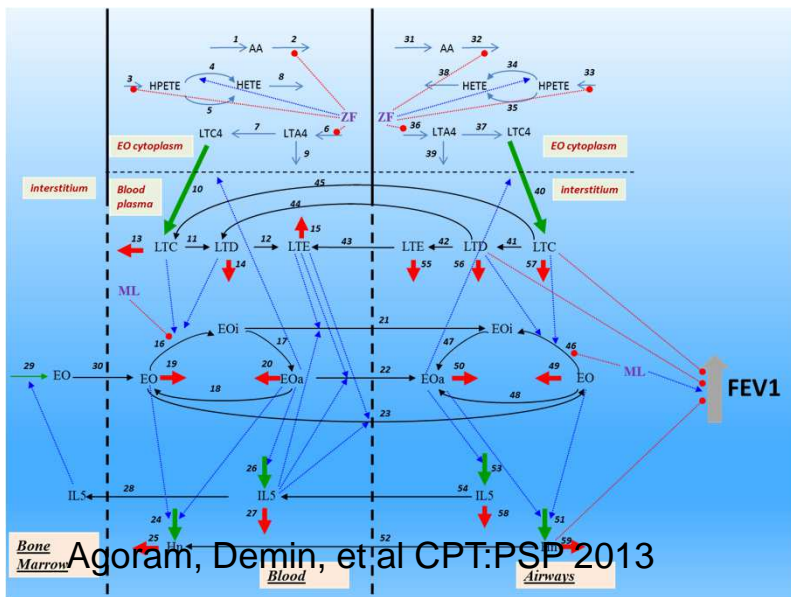

Vs

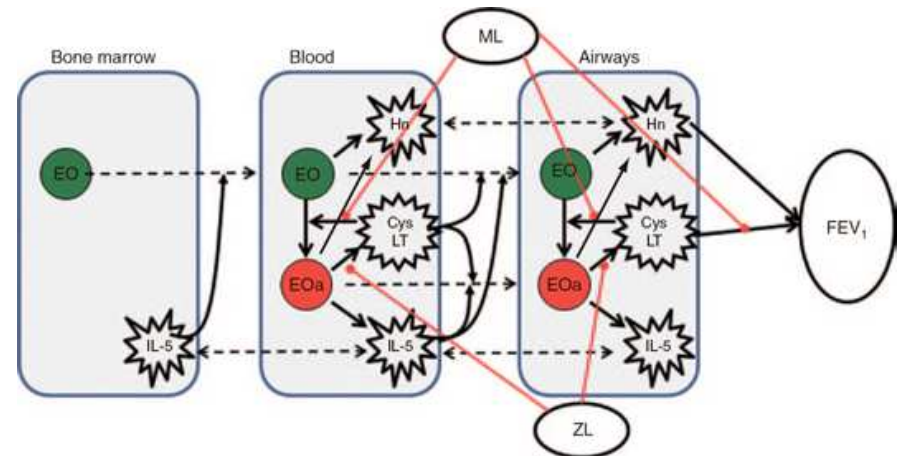

# Communication of model should be succinct...

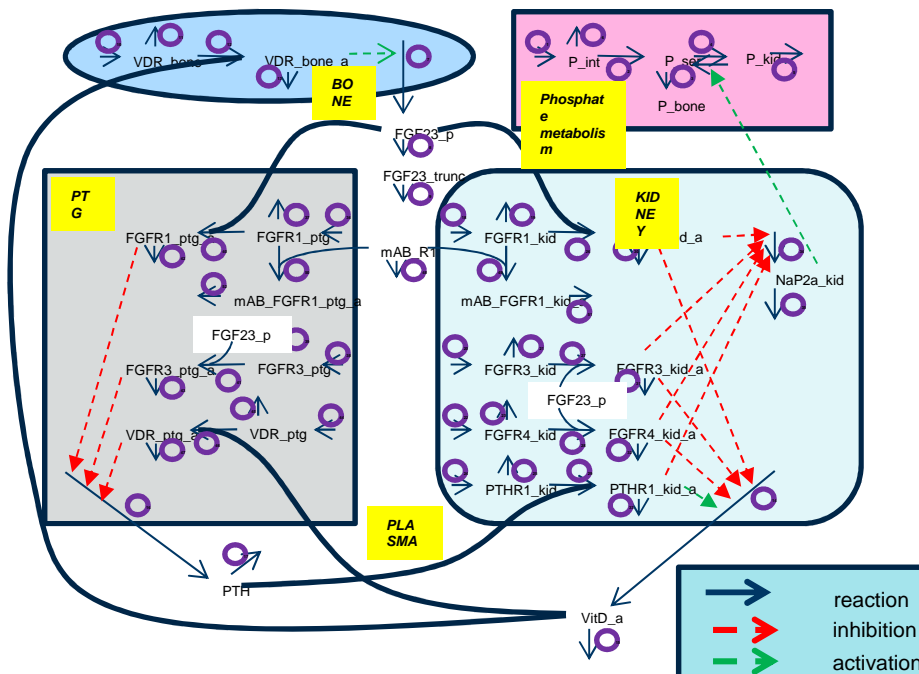

Demin, Agoram, et al PAGE 2012

Balaji Agoram, QSP Basel Feb 2016

Vs

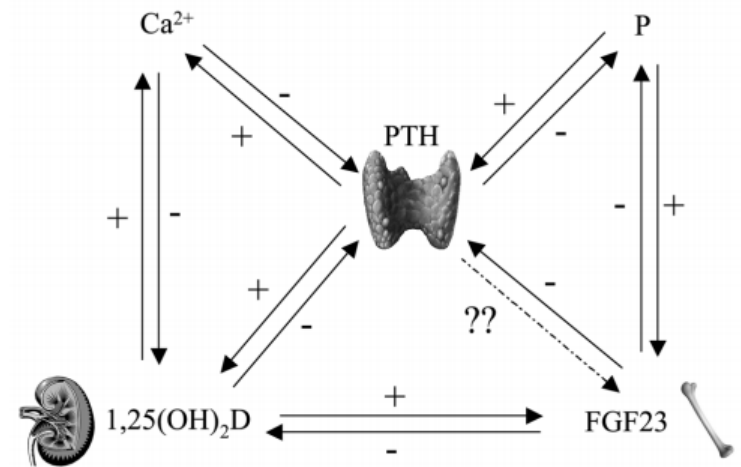

Ben-dov et al 2007



# A simple model of bispecific binding was developed from basic principles

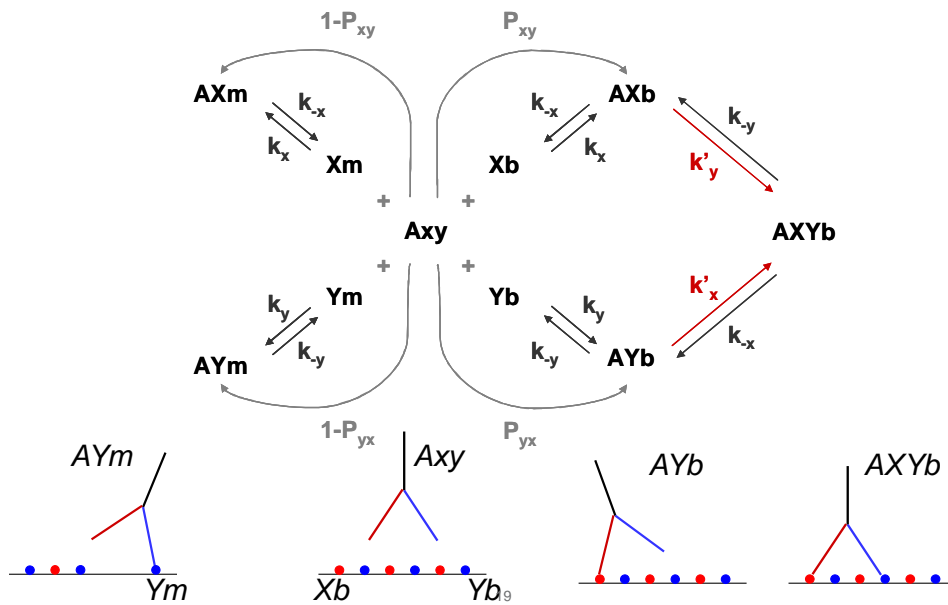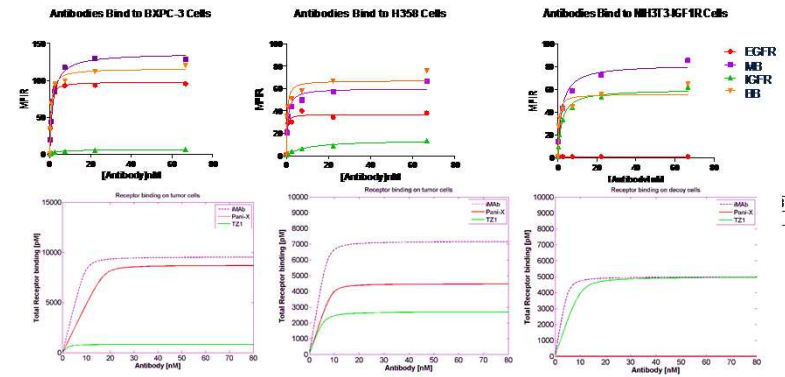

Van Steeg, Agoram, et al mAbs (2016)

Balaji Agoram, QSP Basel Feb 2016



# Binding =f(receptor density): Avidity hypothesis *is* true, albeit **NOT** universally

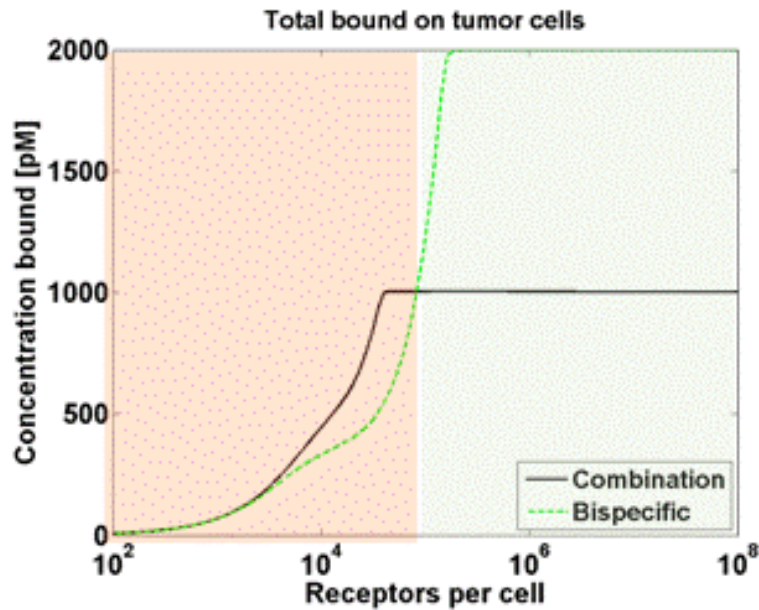

Van Steeg, Agoram, et al mAbs (2016)

m, QSP Basel Feb 2016

20



- In the presence of decoy cells, at high receptor densities, bispecific is better than combination treatment, but not at low receptor densities
- N.B: All in vitro experiments were done at high receptor density

# Communication of results to external audience...

---

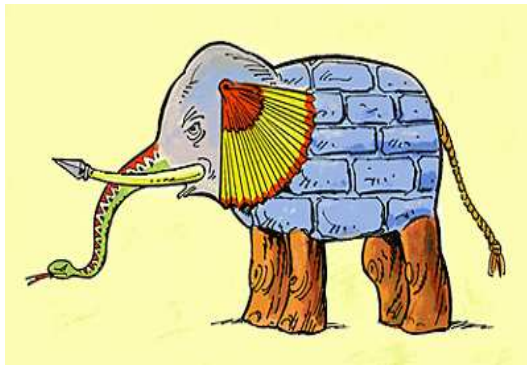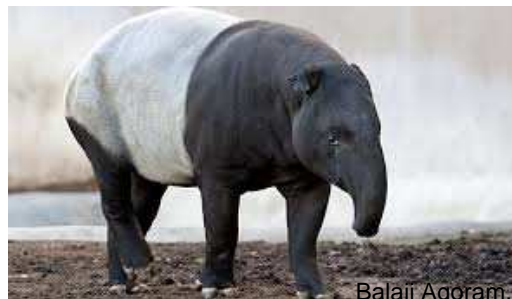

Balaji Agoram, QSP Basel Feb 2016

- Need to convince that the individual submodels add up to an elephant, rather than say... a tapir
- Justification of the underlying structure is critical in systems modelling rather than data fitting
- Selection of data for individual submodels
  - Avoiding bias in data selection and relationships
- Unknown/unknown bias is always present in systems models
  - One among many plausible explanations



# Development of systems models is different from that of PKPD models

---

- Three key elements to the development and implementation of a systems model:
  - Right question, continuous communication/teamwork, and clear communication of results
- The right question is one that is specific, verifiable, supported by data, and not easily answered through traditional methods
- Systems modelling is a community activity → continuous involvement of team members required
- Clear and succinct internal and external communication strategy required



## Confidentiality Notice

This file is private and may contain confidential and proprietary information. If you have received this file in error, please notify us and remove it from your system and note that you must not copy, distribute or take any action in reliance on it. Any unauthorized use or disclosure of the contents of this file is not permitted and may be unlawful. AstraZeneca PLC, 2 Kingdom Street, London, W2 6BD, UK, T: +44(0)20 7604 8000, F: +44 (0)20 7604 8151, [www.astrazeneca.com](http://www.astrazeneca.com)



Supplement: PSP4-6-496-s004.pdf [file PSP4-6-496-s004.pdf]
