# Supplementary material for: Methodologies for Quantitative Systems Pharmacology (QSP) Models: Design and Estimation
Source: PubMed Central journal article supplement — CPT Pharmacometrics Syst Pharmacol. 2017 Jul 11;6(8):496–8. doi: 10.1002/psp4.12206 (PMC5572127; doi:10.1002/psp4.12206), 2017-07-11

*Basel, 04-04-16*

# Roche QSP Methodology Workshop

**Piet van der Graaf**

*Editor-in-Chief  
CPT: Pharmacometrics  
Systems Pharmacology*

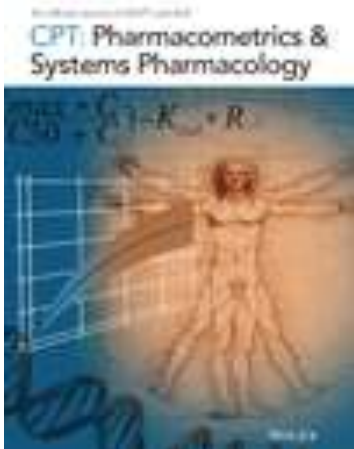

*Leiden Academic Centre for Drug Research (LACDR)  
Leiden University, The Netherlands*

LACDR

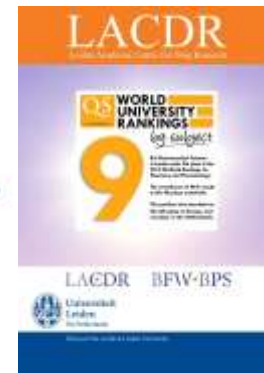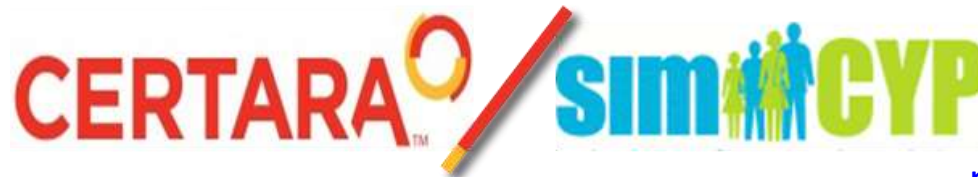

[piet@certara.com](mailto:piet@certara.com)

# Quantitative Systems Pharmacology (QSP) to improve Phase 2 success

Confidence in Proof of Concept

Confidence in Compound

Confidence in Target

Pharmacokinetics-  
Pharmacodynamics

Systems Pharmacology

Target  
Exposure

Target  
Engagement

Target  
Modulation

Pathway  
Modulation

(Patho)-  
Physiological  
Regulation

Disease  
Modification

# Quantitative Systems Pharmacology (QSP) to improve Phase 2 success

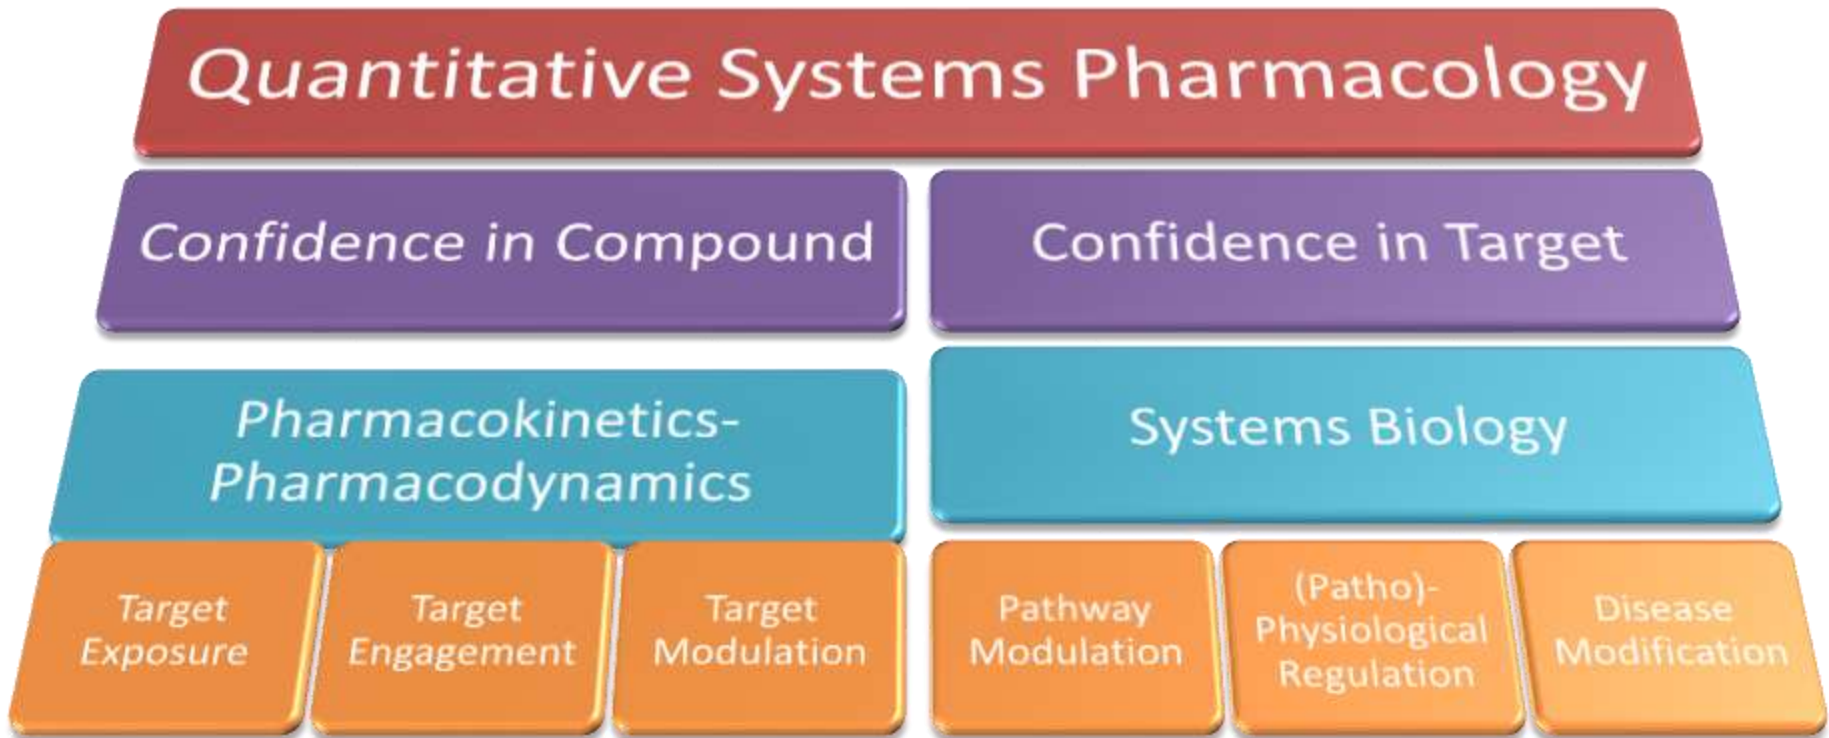

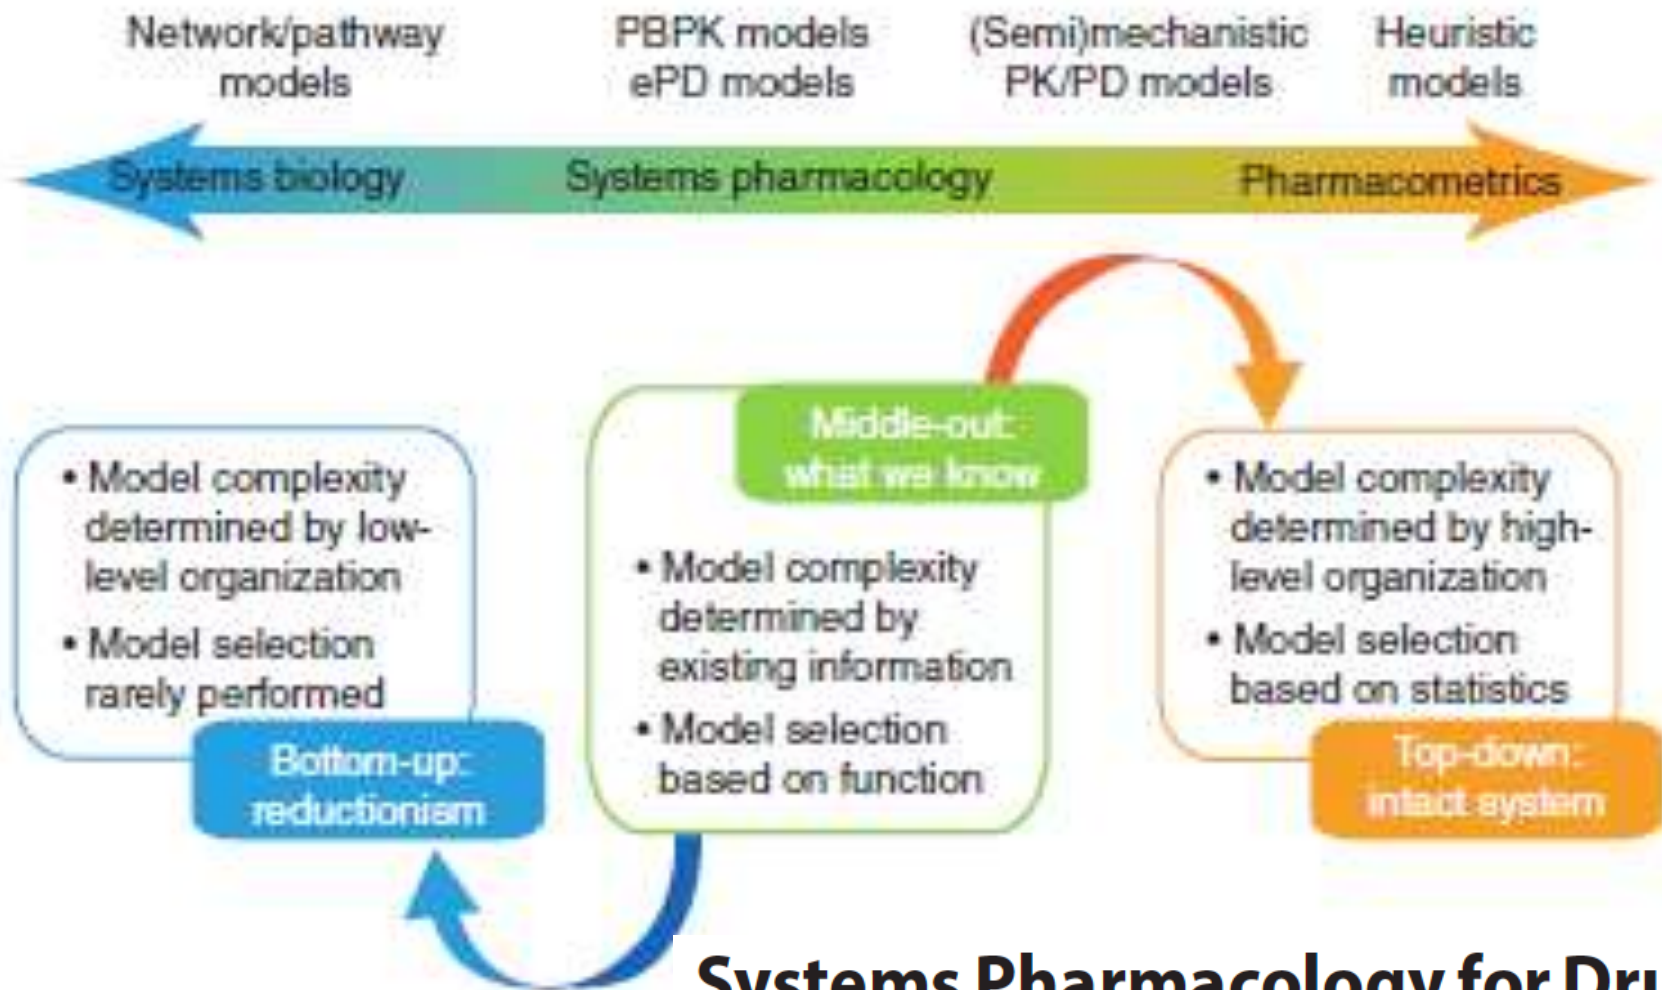

## Systems Pharmacology for Drug Discovery and Development: Paradigm Shift or Flash in the Pan?

# QSP IMPLEMENTATION: Some Points for discussion

## 1. Why, What & When:

- Define the question and potential impact
- Scope and Timing

## 2. How:

- Training and Education
- New data requirements
  - *Biomarkers*
  - *Biomeasures*
- Model validation
- (Precompetitive) collaboration
  - *Models*
  - *Databases*

# QSP IMPLEMENTATION: Some Points for discussion

## 1. Why, What & When:

- Define the question and potential impact
- Scope and Timing

## 2. How:

- Training and Education
- New data requirements
  - *Biomarkers*
  - *Biomeasures*

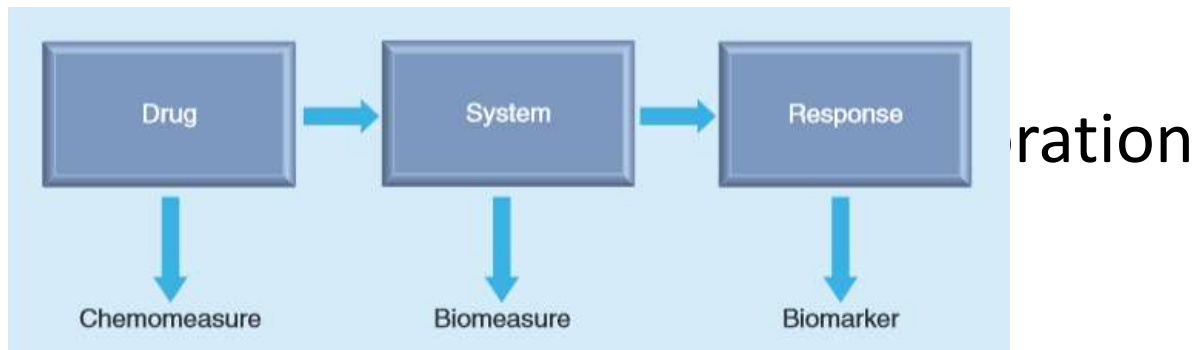

Figure 1. Three types of measures underpinning the development of

## 1. Why,

- De
- Sc

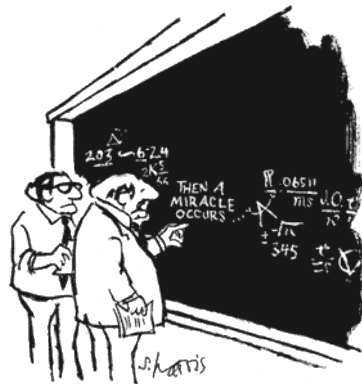

"I THINK YOU SHOULD BE MORE EXPLICIT HERE IN STEP TWO."

*Models are psychologically most appealing when they succeed, but logically strongest when they fail*

After Yates (1978), *Am. J. Physiol.* 3, R159-160

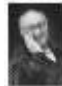

*...all models are wrong, but some are useful*

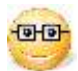

*Wrong models are most useful?*

*Biomeasures*

- Model validation
- (Precompetitive) collaboration
  - *Models*
  - *Databases*

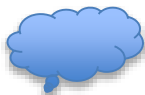

### PERSPECTIVE

## Evaluating Systems Pharmacology Models Is Different From Evaluating Standard Pharmacokinetic-Pharmacodynamic Models

B Agreus<sup>1</sup>

Based on the author's recent experiences, there appears to be some confusion regarding the steps required to qualify a systems pharmacology model as adequate for the intended purpose. This manuscript outlines the model evaluation approach used in the author's recent publication<sup>1</sup> on the systems pharmacology of a 5-lipoxygenase inhibitor and is an attempt to generate discussion on this topic within the pharmacometrics and systems pharmacology community.

*CPT Pharmacometrics Syst Pharmacol* (2014) 3, e101; doi:10.1002/psp.2013.77; published online 19 February 2014

Check CPT Pharmacometrics Syst Pharmacol (2014) 3, e101. doi:10.1002/psp.2013.77  
© 2014 ASPT. All rights reserved 2163-8306/14  
www.interscience.wiley.com

Check CPT Pharmacometrics & Systems Pharmacology (2013) 2, e40. doi:10.1002/psp.2013.26  
© 2013 ASPT. All rights reserved 2163-8306/13  
www.interscience.wiley.com

### COMMENTARY

## Negative Modeling Results: A Dime a Dozen or a Stepping Stone to Scientific Discovery?

B Hendriks<sup>1</sup>

*CPT Pharmacometrics & Systems Pharmacology* (2013) 2, e40; doi:10.1002/psp.2013.26; advance online publication 12 June 2013

Systems pharmacology models, in general, tend to span multiple timescales bridging detailed mechanism with higher level responses or functional outputs. These features serve to put systems pharmacology models in a separate class that brings with it specific challenges, particularly in evaluating such work. When models are constructed on well-understood mechanisms but fail to match experimental data, in what cases should "negative modeling results" be considered scientific findings?

## Summary of PhD Research

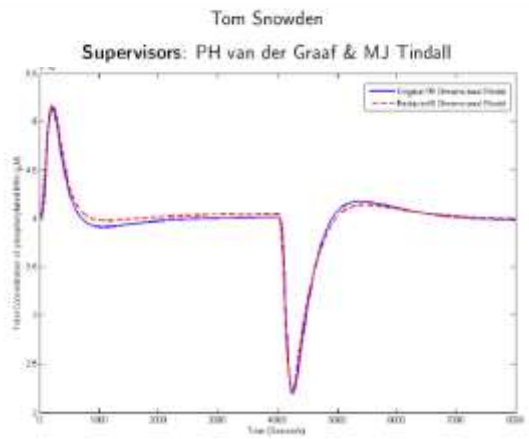

# QSP IMPLEMENTATION

## Need for (precompetitive) collaboration

### MODELS

### DATABASES

#### REVIEW

### The impact of mathematical modeling on the understanding of diabetes and related complications

I Ajmera<sup>1,2</sup>, M Swat<sup>1</sup>, C Lalibe<sup>1</sup>, N Le Novère<sup>1,3</sup> and V Chelliah<sup>1</sup>

Diabetes is a chronic and complex multifactorial disease caused by persistent hyperglycemia and for which underlying pathogenesis is still not completely understood. The mathematical modeling of glucose homeostasis, diabetic condition, and its associated complications is rapidly growing and provides new insights into the underlying mechanisms involved. Here, we discuss contributions to the diabetes modeling field over the past five decades, highlighting the areas where more focused research is required.

*CPT: Pharmacometrics & Systems Pharmacology* (2013) 2, e54; doi:10.1038/psp.2013.30; advance online publication 10 July 2013

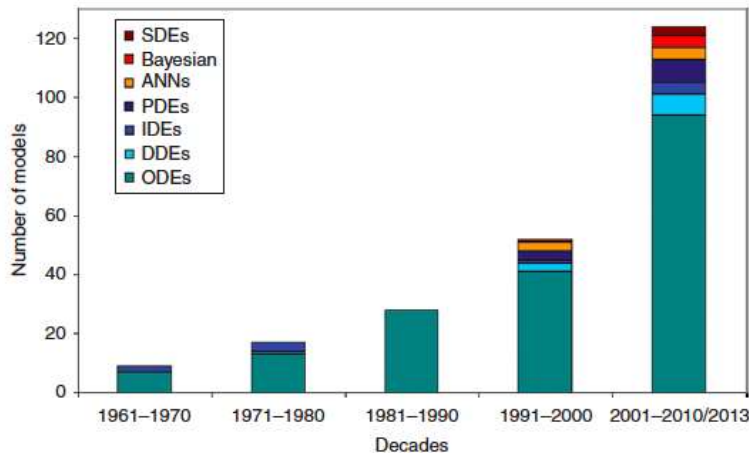

Figure 2 Modeling approaches vs. the number of models in relation to diabetes and associated complications, over the past five decades. There has been a significant increase in the number of models, as well as in the diversity of the modeling approaches applied toward addressing diabetes. ANNs, artificial neural networks; DDEs, delay differential equations; IDEs, integro-differential equations; ODEs, ordinary differential equations; PDEs, partial differential equations; SDEs, stochastic differential equations.

CPT: Pharmacometrics & Systems Pharmacology  
An Official Journal of ASCPT and ISoP

Open Access

#### Database -

### A New Article Type in *CPT: Pharmacometrics & Systems Pharmacology*

Lang Li<sup>1</sup> and Piet H. van der Graaf<sup>2</sup>

<sup>1</sup>Associate Editor

Center for Computational Biology and Bioinformatics, Department of Medical and Molecular Genetics, School of Medicine, Indiana University, Indianapolis, 46202, U.S.A.

[llai@iu.edu](mailto:llai@iu.edu)

<sup>2</sup>Editor-in-Chief

Leiden Academic Centre for Drug Research (LACDR), Systems Pharmacology, 2333 CC Leiden, The Netherlands.

[pspeditor@ascpt.org](mailto:pspeditor@ascpt.org)

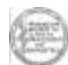

CPT: Pharmacometrics & Systems Pharmacology  
An Official Journal of ASCPT and ISoP

Open Access

Citation: *CPT: Pharmacometrics Syst. Pharmacol.* (2015) 00, 00; doi:10.1002/psp4.55  
© 2015 ASCPT. All rights reserved.

#### DATABASE

### Organ Impairment—Drug–Drug Interaction Database: A Tool for Evaluating the Impact of Renal or Hepatic Impairment and Pharmacologic Inhibition on the Systemic Exposure of Drugs

CK Yeung<sup>1,2</sup>, K Yoshida<sup>3</sup>, M Kusama<sup>4</sup>, H Zhang<sup>5</sup>, I Regueneau-Najess<sup>6,7</sup>, S Argon<sup>8</sup>, L Li<sup>9</sup>, P Chang<sup>9</sup>, CD Le<sup>9</sup>, P Zhao<sup>9</sup>, L Zhang<sup>9</sup>, Y Sugiyama<sup>4</sup> and S-M Huang<sup>10</sup>

The organ impairment and drug–drug interaction (OI-DDI) database is the first rigorously assembled database of pharmacokinetic drug exposure data from publicly available renal and hepatic impairment studies presented together with the maximum change in drug exposure from drug interaction inhibition studies. The database was used to conduct a systematic comparison of the effect of renal/hepatic impairment and pharmacologic inhibition on drug exposure. Additional applications are feasible with the public availability of this database.

*CPT: Pharmacometrics Syst. Pharmacol.* (2015) 00, 00; doi:10.1002/psp4.55; published online on 0 Month 2015.



# QSP IMPLEMENTATION

## Need for (precompetitive) collaboration

### Status of Quantitative Systems Pharmacology Modeling in the Pharmaceutical Industry: A Consortium Survey of the What, When and How

Mohamad Shebley<sup>1</sup>, Marjoleen Nijssen<sup>1</sup>, Masoud Jamei<sup>2</sup> and Amin Rostami-Hodjegan<sup>2,3</sup>

<sup>1</sup> Translational Modeling & Simulations, DMPK Bioanalysis, AbbVie Inc, North Chicago IL U.S.A.; <sup>2</sup> Simcyp Limited (a Certara Company), Blades Enterprise Centre, Sheffield S2 4SU, UK; <sup>3</sup> Centre for Applied Pharmacokinetic Research, Manchester Pharmacy School, University of Manchester, Stopford Building, Oxford Road, Manchester M13 9PT, UK

**Question 1.**  
Is QSP modeling a part of your company's modeling & simulations tool box?

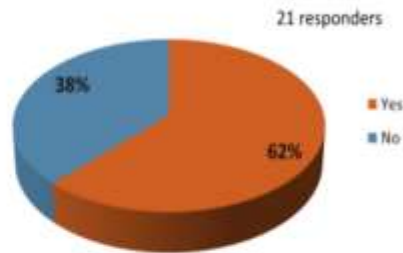

**If so, do you have dedicated QSP modellers within your company?**

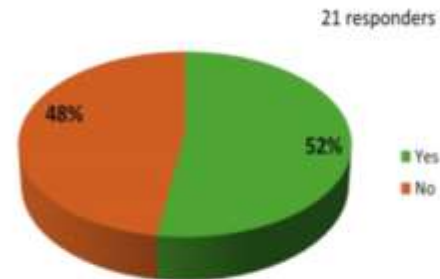

**Question 4.**  
What applications does your company mostly utilize/plan to utilize QSP approaches for?

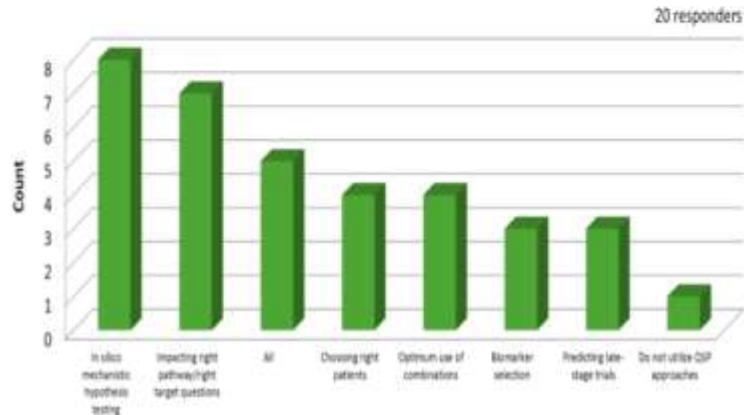

**Question 5.**  
Is your company interested in developing pre-competitive QSP disease models? If so, which therapeutic areas or indications?

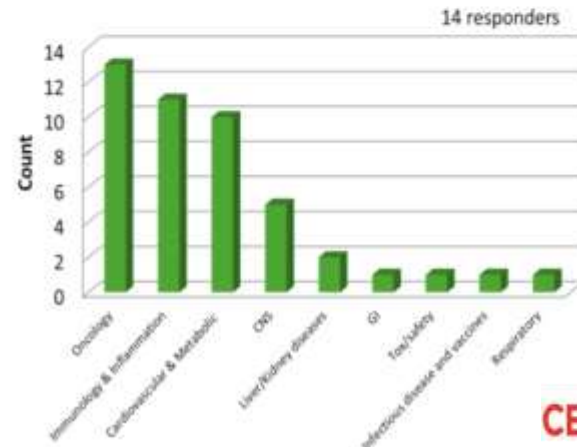

# Clinical Pharmacology Review of Natpara® (BLA 125511)

Endocrinologic and Metabolic Drugs Advisory Committee  
Advisory Committee Meeting, September 12, 2014

Manoj Khurana, PhD  
Immo Zadezensky, PhD  
Nitin Mehrotra, PhD  
Office of Clinical Pharmacology

## Natpara

Natpara is recombinant human parathyroid hormone (PTH) identical in primary sequence to the full-length human endogenous hormone (i.e., 84 amino acids)

Indication sought:

- Natpara for injection is a replacement for endogenous parathyroid hormone (1-84) indicated for the long-term treatment of hypoparathyroidism*

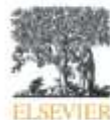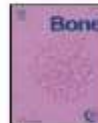

A physiologically based mathematical model of integrated calcium homeostasis and bone remodeling

Mark C. Peterson <sup>a,\*</sup>, Matthew M. Riggs <sup>b</sup>

### Optimizing the PKPD – Conceptual Framework

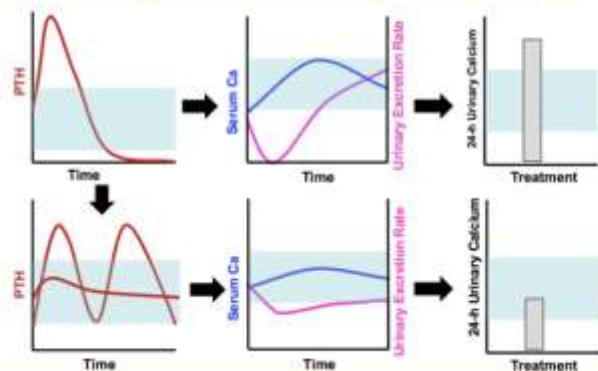

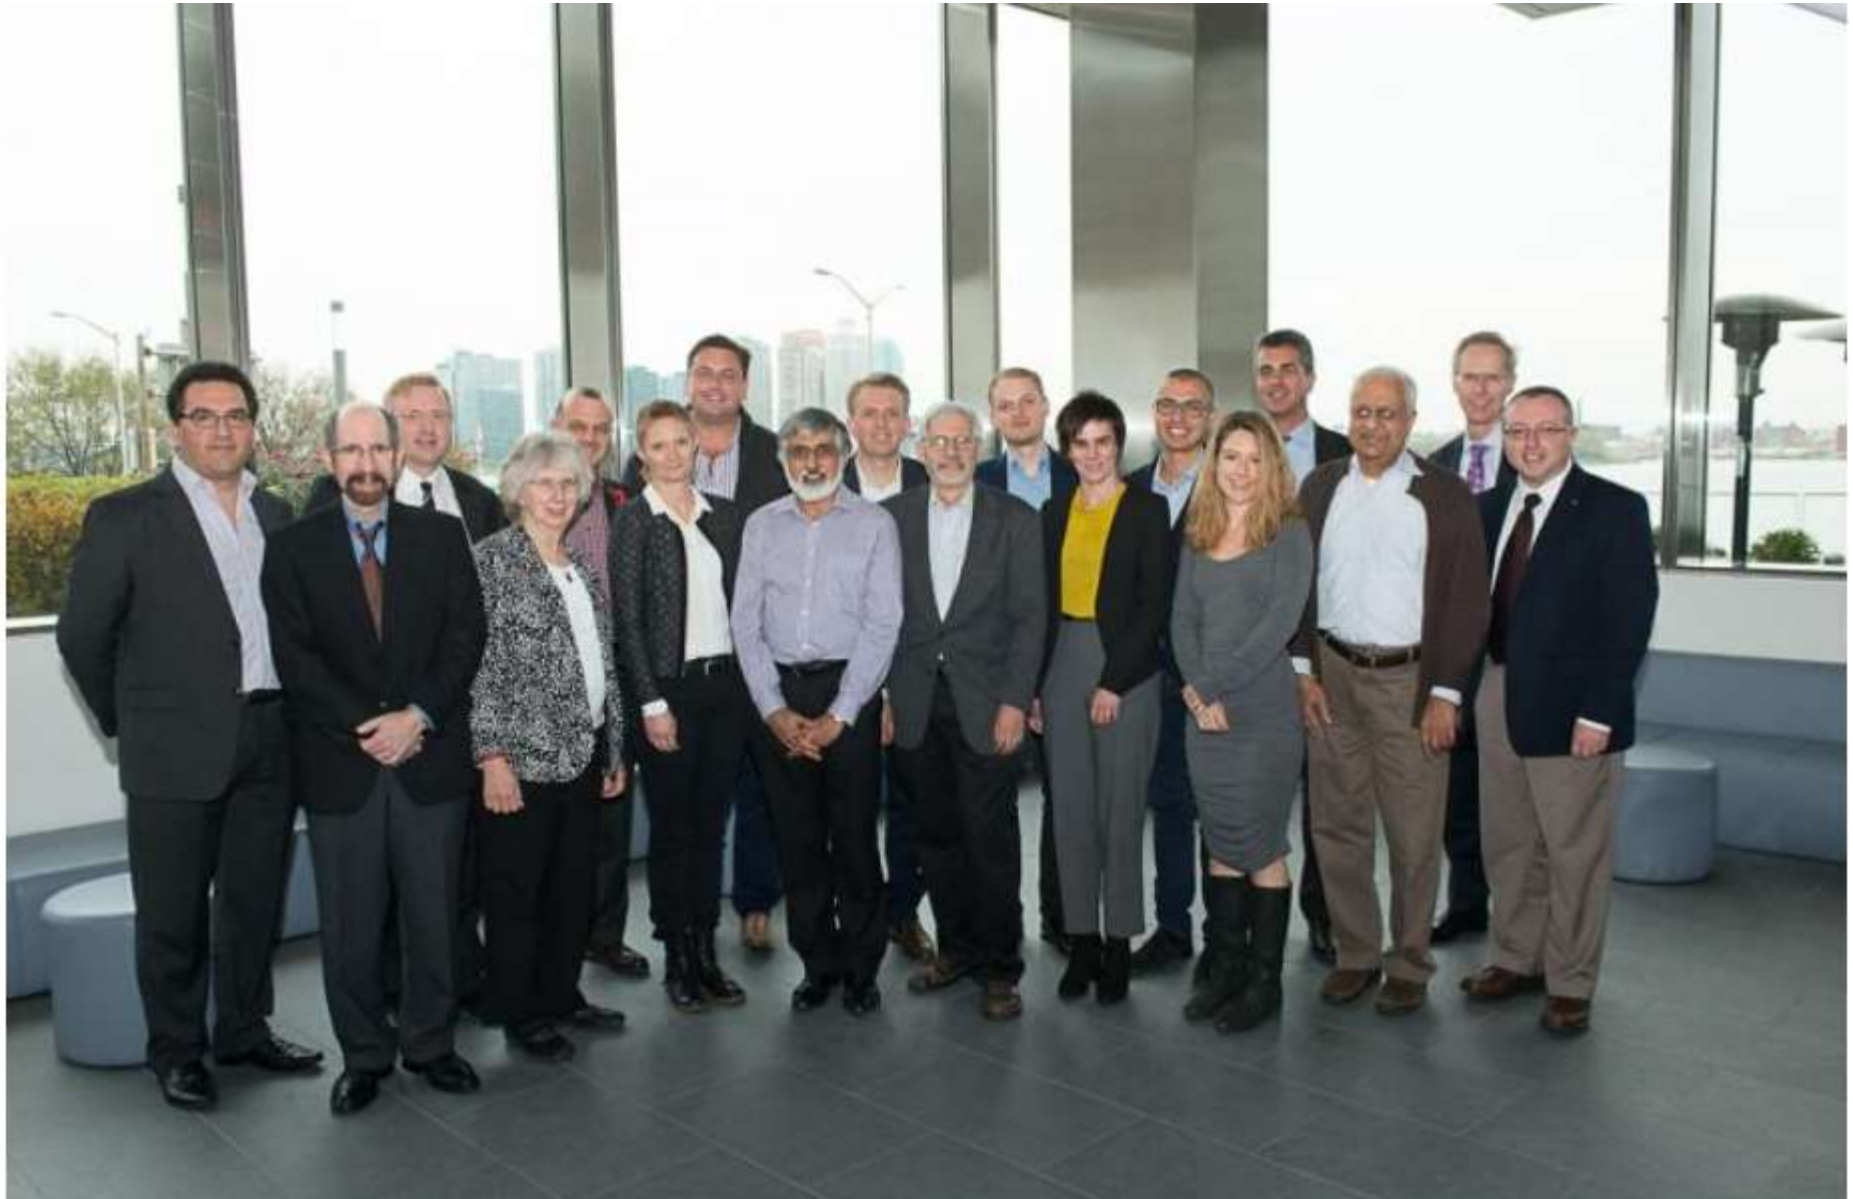

Supplement: PSP4-6-496-s005.pdf [file PSP4-6-496-s005.pdf]
