# Supplementary material for: Methodologies for Quantitative Systems Pharmacology (QSP) Models: Design and Estimation
Source: PubMed Central journal article supplement — CPT Pharmacometrics Syst Pharmacol. 2017 Jul 11;6(8):496–8. doi: 10.1002/psp4.12206 (PMC5572127; doi:10.1002/psp4.12206), 2017-07-11
Supplement: PSP4-6-496-s001.pdf [file PSP4-6-496-s001.pdf]

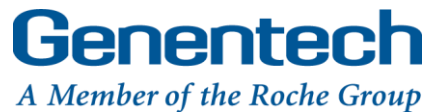

# Exploring Biological Variability & Uncertainty in Quantitative Systems Pharmacology Models

Kapil Gadkar  
Basel, February 2016

# Workflows in QSP: Bridging Conceptual Workflows and Execution?

## Descriptive workflows e.g., Visser et al CPTPSP 2015

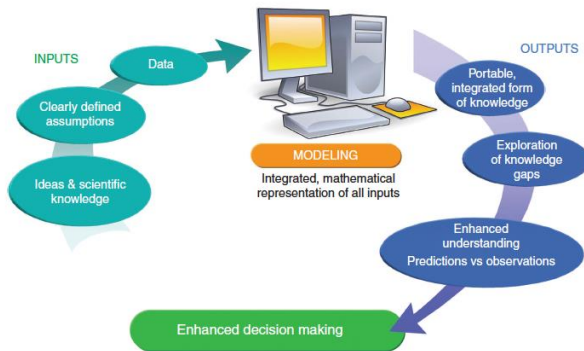

## Qualification Workflows e.g., ROSA MQM<sup>®</sup> Friedrich et al CPTPSP 2016

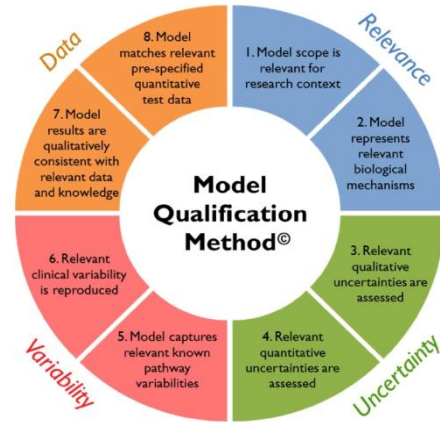

## Computational workflows e.g., Ghosh et al 2011, Nature Revs- Genetics

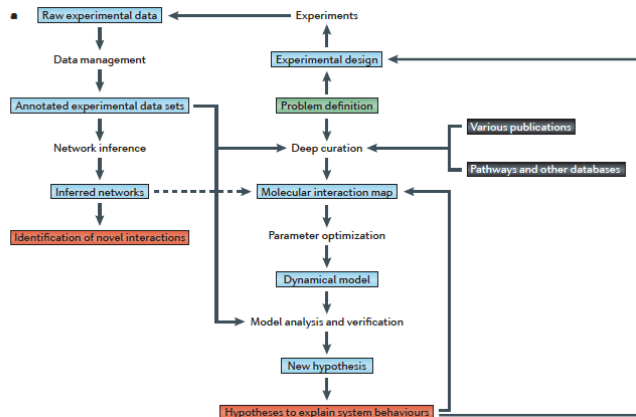

## Workflows for specific analyses e.g., Zhang et al 2015, CPTPSP

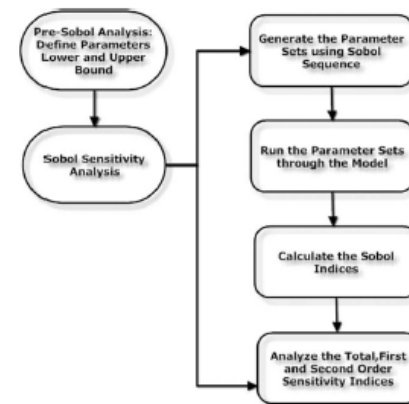

# Workflow & Technical Methodologies: Six Stages of QSP model development and Implementation

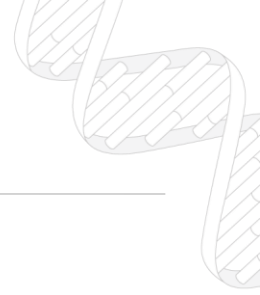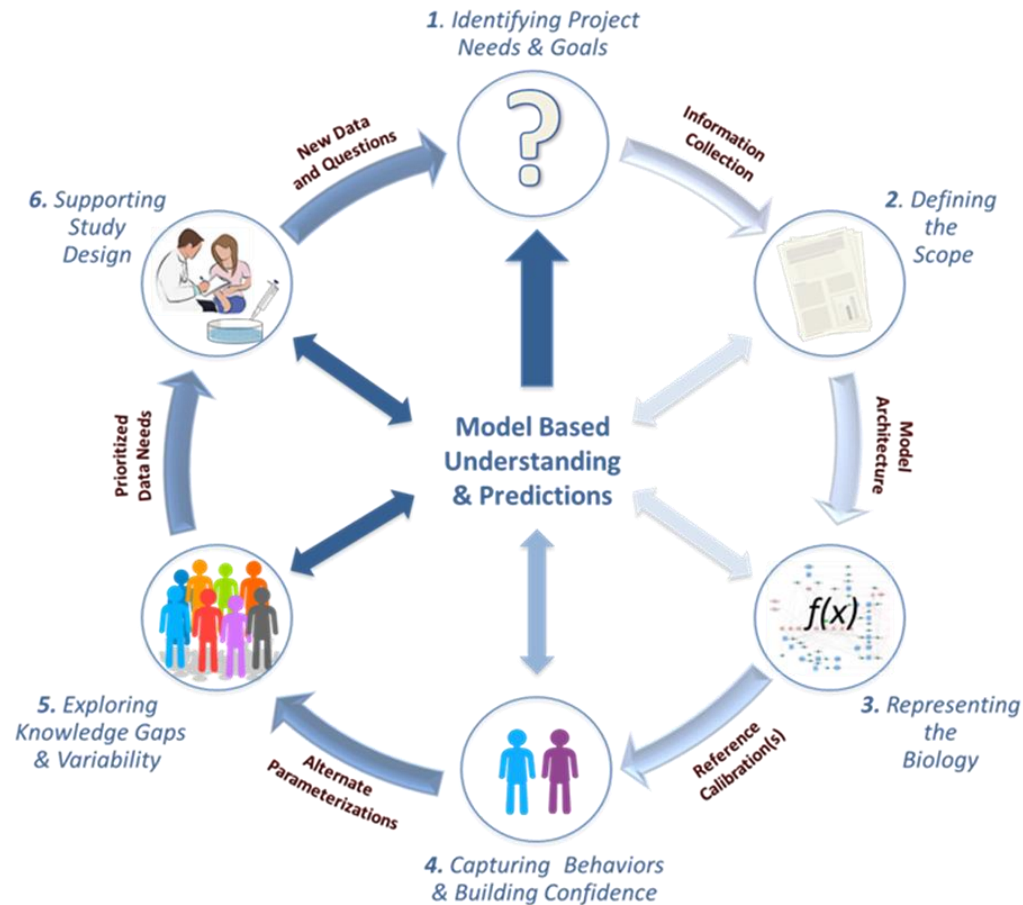

## Six stages of QSP model development & implementation

1. Identifying project needs & goals
2. Defining model and project scope
3. Representing the biology
4. Capturing behaviors
5. Explore knowledge gaps & variability
6. Supporting experimental & clinical design

Gadkar et al, CPT-PSP 2016

# Workflow & Technical Methodologies: Six Stages of QSP model development and Implementation



## Considerations & Activities

- Careful evaluation of problem context and specification of the needs to be met
- Clear understanding of the decisions that will be potentially impacted
- Deadlines & time frame for decisions and milestones
- Evaluation of whether QSP is the right approach
- Identification and interaction with key stakeholders and collaborators

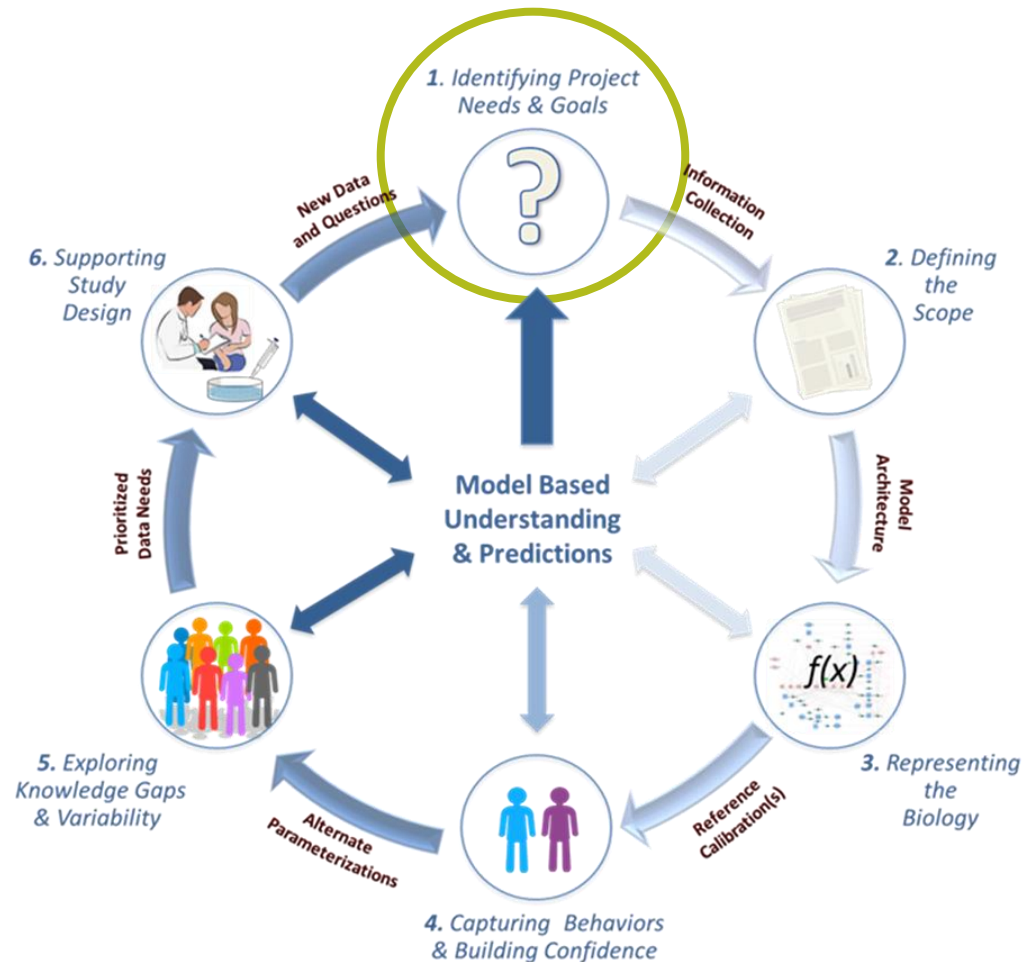

Gadkar et al, CPT-PSP 2016

# Workflow & Technical Methodologies: Six Stages of QSP model development and Implementation

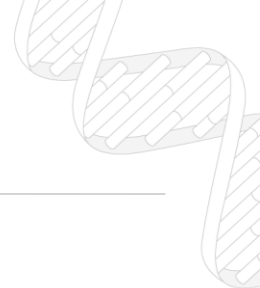

## Considerations & Activities

- Extensive review & organization of information & data from varied sources
- Identify key knowledge gaps
- Specification of the QSP model qualification criteria<sup>1</sup>
- Visual map of the biology of scope with tools such as Cytoscape, JDesigner, others

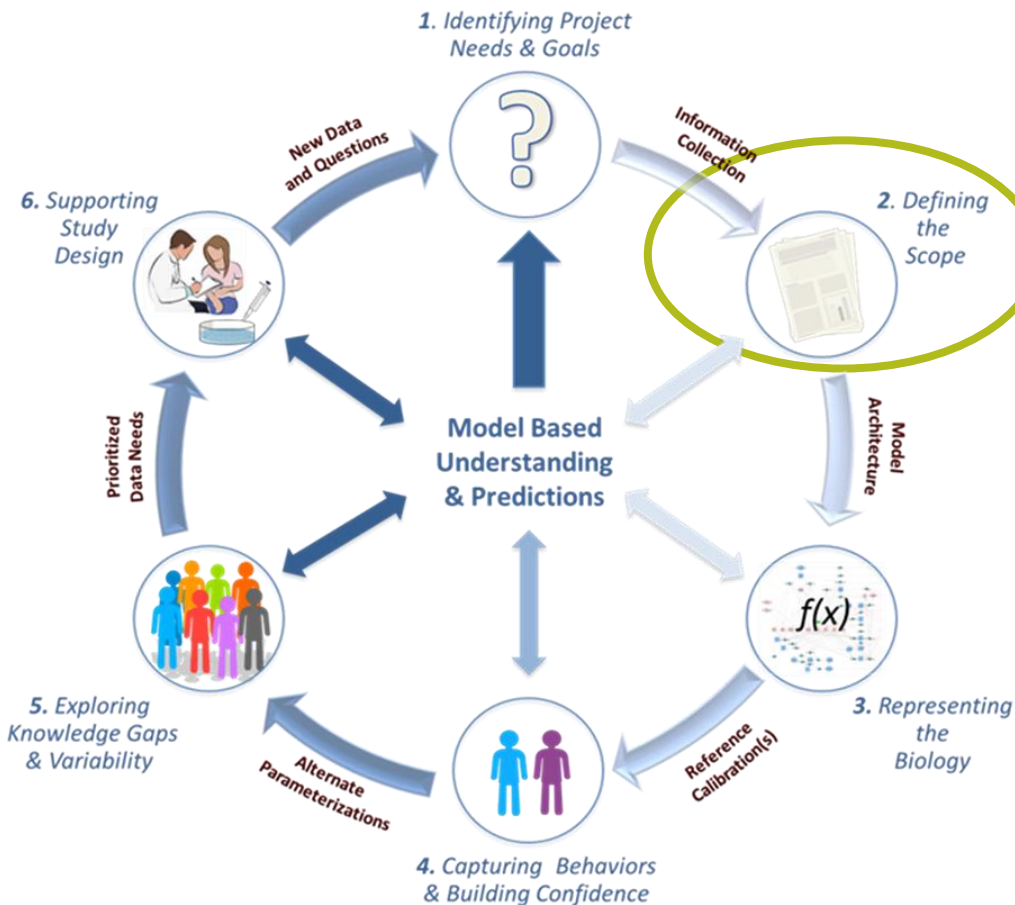

Gadkar et al, CPT-PSP 2016

1. Friedrich et al; Facilitating Drug Discovery and Development with Mechanistic Physiological Models that are "Fit for Purpose": Introducing a Model Qualification Method 2012

# Workflow & Technical Methodologies: Six Stages of QSP model development and Implementation



## Considerations & Activities

- Choice of mathematical formalism & implementation of equations

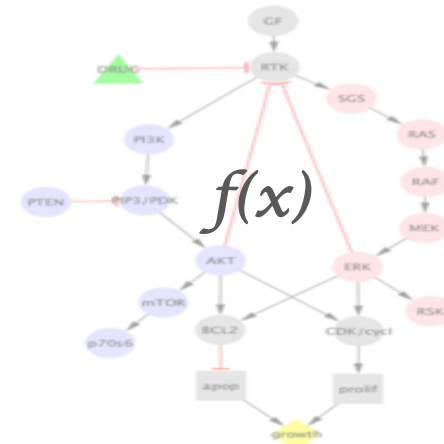

- Alternate model structures and/or topologies

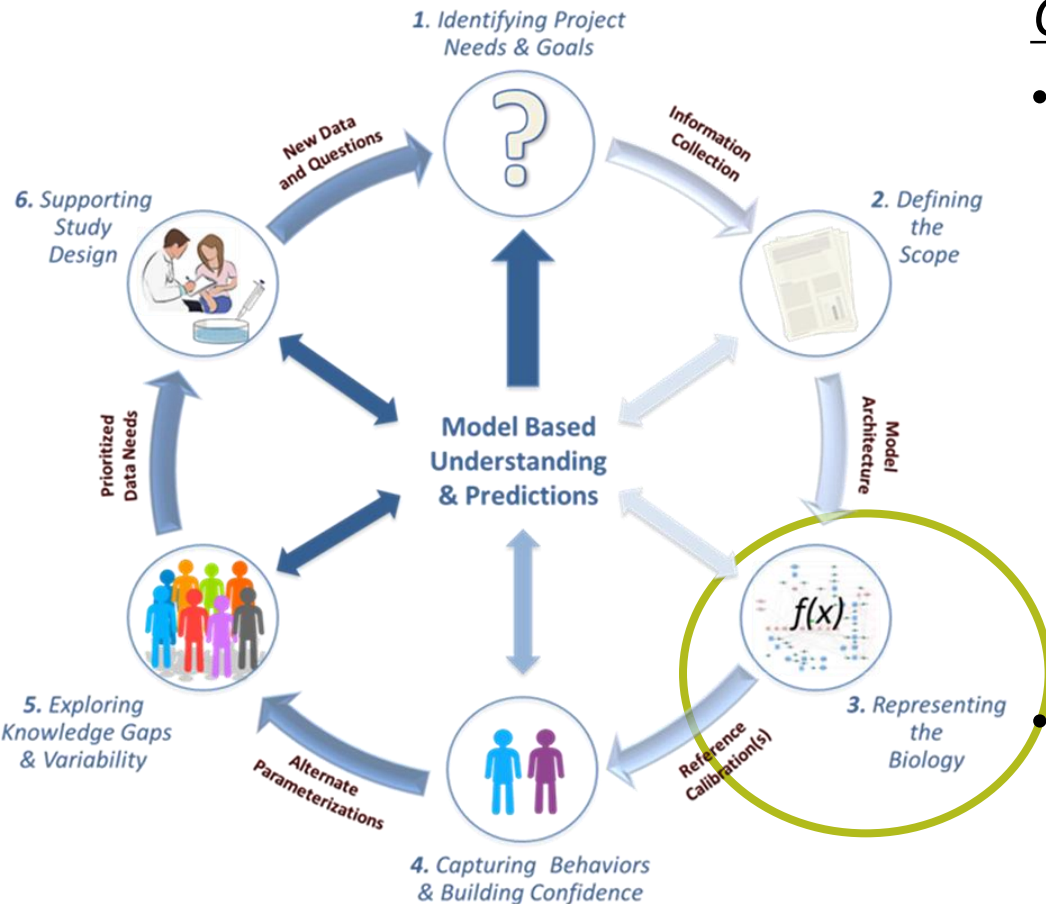

Gadkar et al, CPT-PSP 2016

# Workflow & Technical Methodologies: Six Stages of QSP model development and Implementation

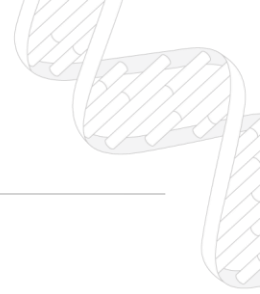

## Focus of today's talk

### Capturing "Reference" behavior

- Overview of tools
- Example application

### Virtual populations (Vpops) as a means to explore variability & uncertainty

- A methodology for developing Vpops
- Case studies demonstrating application of the tools and workflows

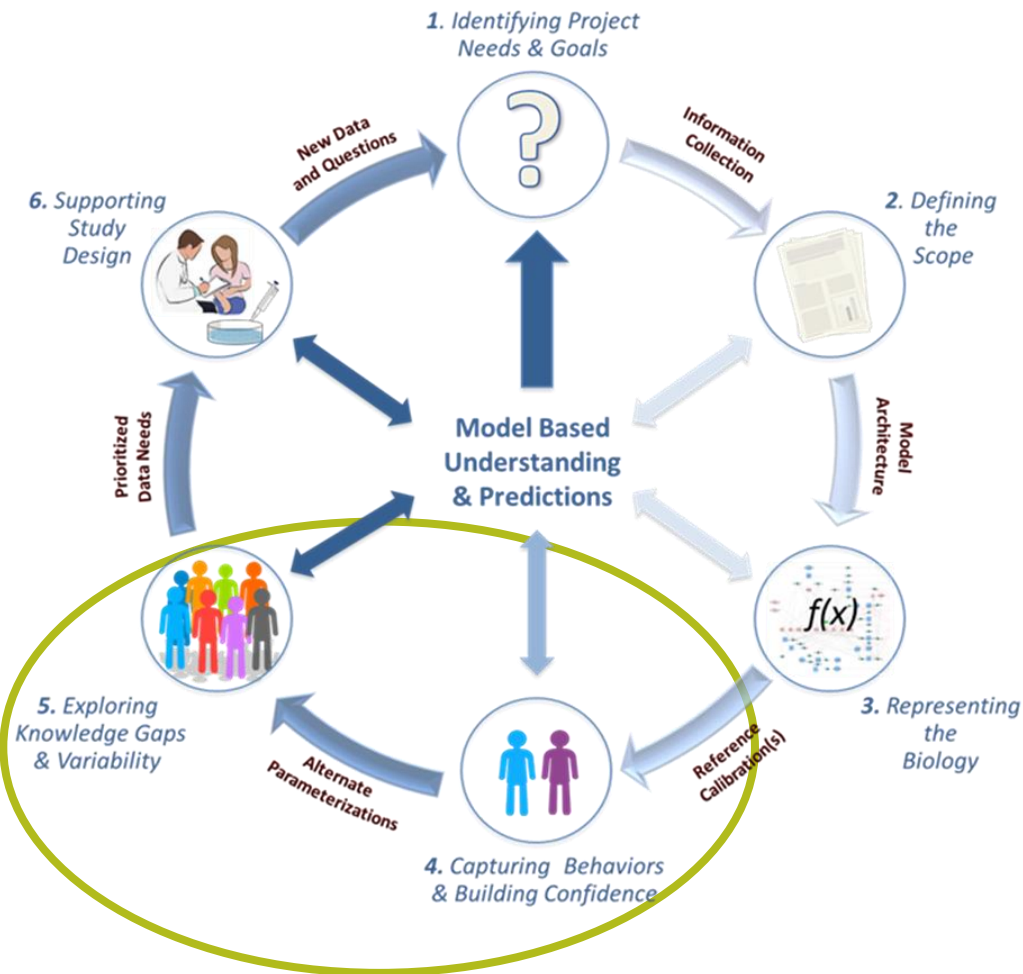

Gadkar et al, CPT-PSP 2016

# What kinds of uncertainty and variability do we commonly encounter

## Insufficient or imperfect mechanistic knowledge

- Alternate hypotheses? Conflicting data? Missing data?
- Translational relevance?

## Quantitative uncertainty

- Lack of quantitative prior information on modeled entities and/or process parameters (e.g. what is the level or rate of X)

## Known inter-subject or intra-subject (spatial or time)

### Variability

- Can be either qualitative or quantitative



# Using Virtual Subjects to Represent Uncertainty & Variability

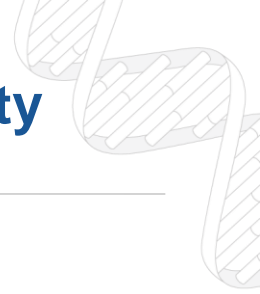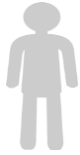

## Virtual subject (VS)

Single structure & parameterization of the model yielding *virtual measurements* within ranges of corresponding data

- subject = animal, human, cell, pathway, ...

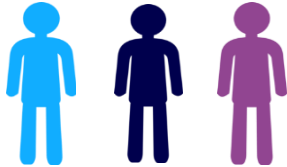

## Reference virtual subject (Ref VS)

Virtual subject with virtual measurements representative of corresponding real-world data in a specified patient phenotype

- e.g., severe vs. moderate vs. mild disease activity

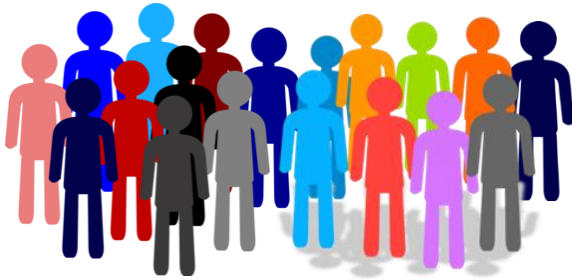

## Virtual Cohort

Collection of “candidate” virtual subjects with alternate structures or parameterizations each yielding measurements consistent with corresponding data

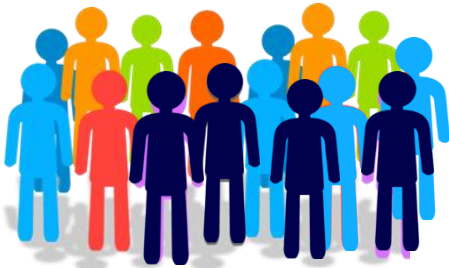

## Virtual Population (VPop)

Set of virtual subjects (from a virtual cohort) that is selected and statistically *weighted* to reproduce selected statistical features of corresponding data

- e.g., mean and std. dev. of biomarker measurements

# “Reference” calibration indicative of high likelihood of success for QSP model

## Considerations & Activities

- A “reference” calibration ensures topology and mathematical representation sufficient

# “Reference” calibration indicative of high likelihood of success for QSP model

## Considerations & Activities

- A “reference” calibration ensures topology and mathematical representation sufficient
- Sensitivity analysis (local vs. global)<sup>1,2</sup>

| Criteria for comparison                  | Commonly used global sensitivity analysis methods     |                                             |                                              |                                               |       |
|------------------------------------------|-------------------------------------------------------|---------------------------------------------|----------------------------------------------|-----------------------------------------------|-------|
|                                          | Weighted average of local sensitivity analysis (WALS) | Partial rank correlation coefficient (PRCC) | Multi-parametric sensitivity analysis (MPSA) | Fourier amplitude sensitivity analysis (FAST) | Sobol |
| Discrete inputs                          | Yes                                                   | Yes                                         | Yes                                          | Yes                                           | Yes   |
| Model independence                       | No                                                    | No                                          | No                                           | Yes                                           | Yes   |
| Non-linear, input-output relationship    | Yes                                                   | Yes                                         | Yes                                          | Yes                                           | Yes   |
| Non-monotonic input-output relationship  | Yes                                                   | No                                          | Yes                                          | Yes                                           | Yes   |
| Robustness                               | Yes                                                   | Yes                                         | Yes                                          | Yes                                           | Yes   |
| Reproducibility                          | Yes                                                   | Yes                                         | Yes                                          | Yes                                           | Yes   |
| Ability to apportion the output variance | No                                                    | No                                          | No                                           | Yes                                           | Yes   |
| Higher order interaction of parameters   | No                                                    | No                                          | No                                           | Yes                                           | Yes   |
| Quantitative measure for ranking         | Yes                                                   | Yes                                         | Yes                                          | Yes                                           | Yes   |
| Computational efficiency                 | Yes                                                   | Yes                                         | Yes                                          | No                                            | No    |

Zhang et al.<sup>2</sup>

1. Marino, S., I. B. Hogue, et al. (2008). "A methodology for performing global uncertainty and sensitivity analysis in systems biology." *J Theor Biol* 254(1): 178-196
2. Zhang et. Al. (2015). "Sobol Sensitivity Analysis: A Tool to Guide the Development and Evaluation of Systems Pharmacology Models", CPT-PSP, Feb.

# “Reference” calibration indicative of high likelihood of success for QSP model

## Considerations & Activities

- A “reference” calibration ensures topology and mathematical representation sufficient
- Sensitivity analysis (local vs. global)<sup>1,2</sup>
- Parameter estimation via optimization<sup>3,4</sup>

| Optimization approach       | Example algorithms                                                                                                                        | Strengths                                          | Caveats                                                           | Example prior applications               |
|-----------------------------|-------------------------------------------------------------------------------------------------------------------------------------------|----------------------------------------------------|-------------------------------------------------------------------|------------------------------------------|
| <b>Local</b>                | Levenberg-Marquardt                                                                                                                       | Simplicity,<br>Computational efficiency            | Local minimum only;<br>Requires convex, smooth objective function | Multiple                                 |
| <b>Deterministic Global</b> | Branch and Bound                                                                                                                          | Guaranteed global min                              | Computationally expensive                                         | Metabolic systems                        |
| <b>Stochastic Global</b>    | Simulated Annealing,<br>Genetic Algorithms,<br>Evolutionary Programming,<br>Evolutionary Strategies,<br>Particle Swarm,<br>Scatter Search | Computational efficiency;<br>Near global minimum   | Global minimum not guaranteed                                     | Blood coagulation<br>Signal transduction |
| <b>Hybrid</b>               | Combinations of the above                                                                                                                 | Leverages strengths of local and global approaches | Fewer and less widely tested algorithms available                 | Lipid metabolism                         |

1. Marino, S., I. B. Hogue, et al. (2008). "A methodology for performing global uncertainty and sensitivity analysis in systems biology." *J Theor Biol* 254(1): 178-196
2. Zhang et. Al. (2015). "Sobol Sensitivity Analysis: A Tool to Guide the Development and Evaluation of Systems Pharmacology Models", CPT-PSP, Feb.
3. Sun, J., V. Palade, et al. (2014). "Biochemical systems identification by a random drift particle swarm optimization approach." *BMC Bioinformatics* 15 Suppl 6: S1
4. Rodriguez-Fernandez et al. (2006). "Novel metaheuristic for parameter estimation in nonlinear dynamic biological systems." *BMC Bioinformatics* 7: 483

# Workflow and considerations for Reference Subject calibration

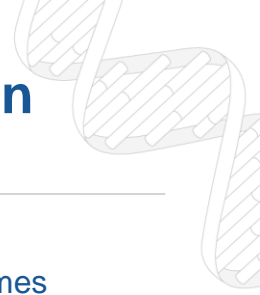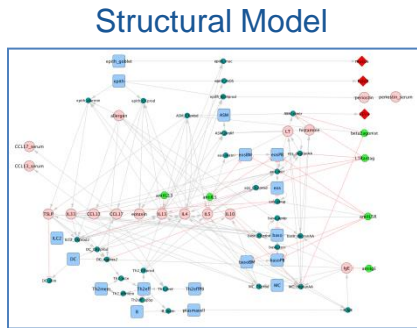

Parameter space,  $p$

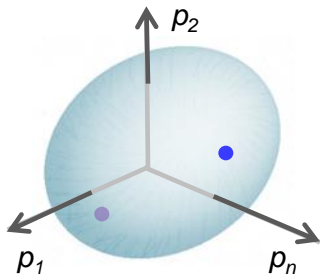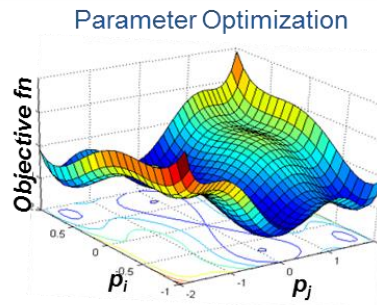

Model Analysis

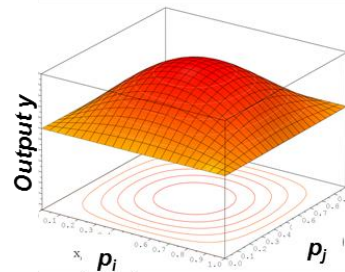

Parameter Sensitivity

Physiological outcomes  
"Acceptance" Criteria

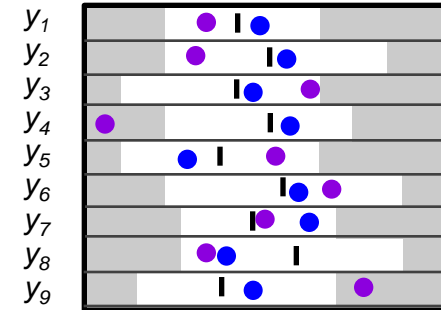

Virtual Subjects

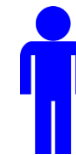

Reference  
Virtual  
Subject

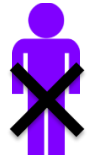

Invalid  
Virtual  
Subject

## Considerations

- Defining the objective function is non-trivial & critical for efficient Reference Subject calibration
- Iteration on QSP model representation is critical at this stage: (i) modifications to mathematical representation; (ii) expansion/reduction of biology included; (iii) alternate hypothesis testing
- Developing a suite of algorithms/tools specific for to QSP models is of high value

# Example: Mechanism-based Asthma disease model for target validation, molecule selection & biomarker evaluation:

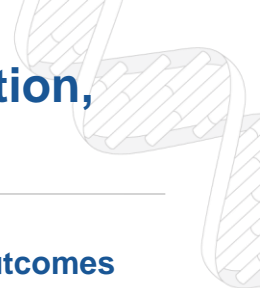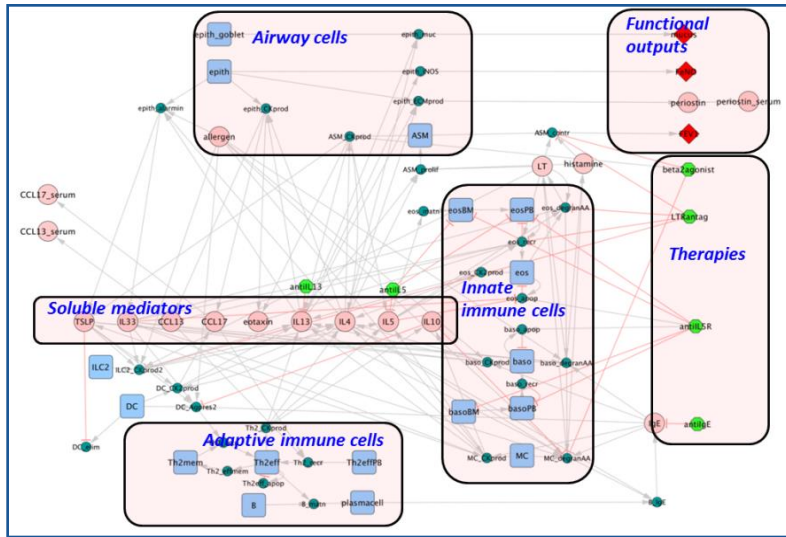

Parameter space,  $p$

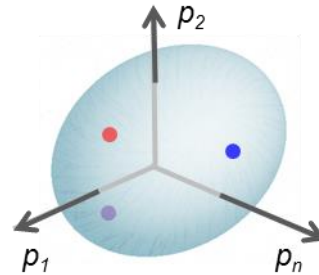

**120+ parameters explored in calibration using Scatter Search**

Physiological outcomes

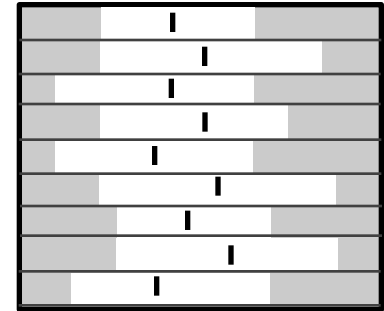

**150+ outcomes used in calibration**

- **Biomarkers & clinical endpoints**
- **Baseline & response to 10+ interventions**

## Key Biological mechanisms & scope

- Activation /recruitment of innate immune cells: eosinophils, basophils, dendritic cells, ILC2s, mast cells, neutrophils
- Activation of adaptive immune cells: Th2, B, plasma cells, Th17
- Production of soluble mediators and their effects
- Airway response: Epithelial cell mediator & mucus production, ASM contraction

## Clinical Scope

**Clinical endpoints:** FEV1, FeNO

**Patients types:** healthy, asthmatics (range of disease severity), eosinophilic vs. neutrophil dominant

**Interventions:** anti-IL5, anti-IL13, anti-IgE, steroids, anti-IL4/IL13, other single/multiple target interventions

## Mechanistic in-vitro & preclinical data

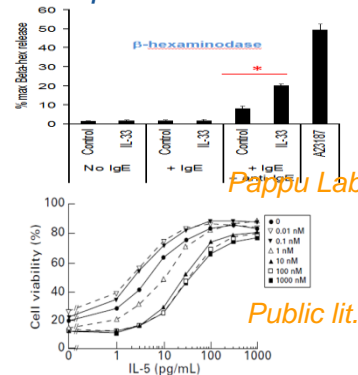

## In house and public clinical database (data from 50+ clinical studies)

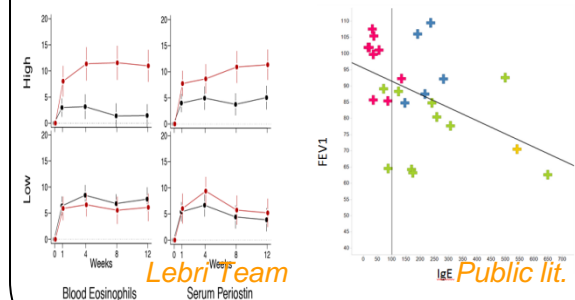

# Application of stochastic global optimization for Reference Subject(s) calibrations in the Asthma QSP platform

## Implementation Considerations

- Data for different patient phenotypes (variability in mechanistic drivers, disease severity)
- Data across multiple cell types, mediators & clinical readouts for multiple therapies/interventions
  - Appropriate data normalization
  - Simultaneous simulations of all interventions for objective function evaluation
- Several mechanistic limitations of model identified in this step and model updated accordingly

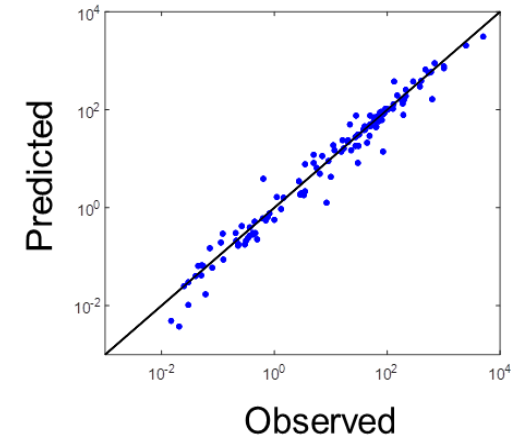

## Capturing the “reference” behavior

### Baseline characteristics

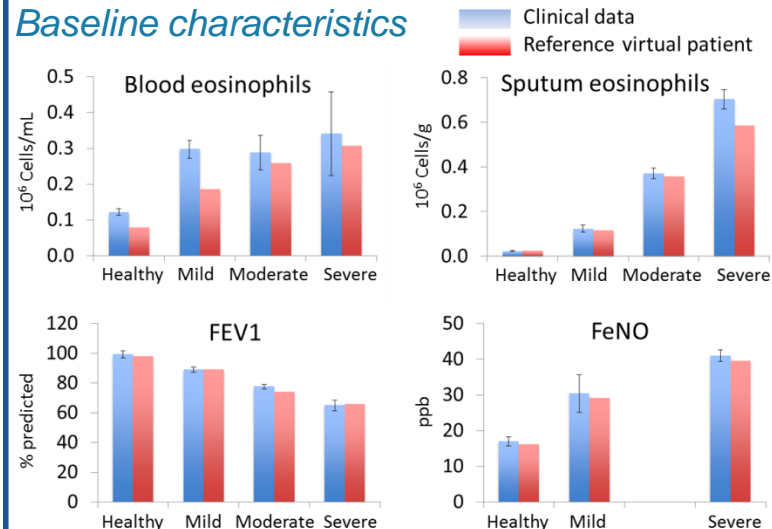

### Response to therapies (severe reference subject)

#### Lebrikizumab (anti-IL13)<sup>1</sup>

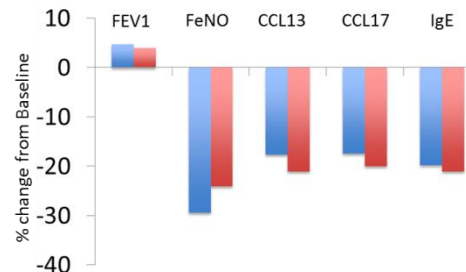

#### Omalizumab (anti-IgE)<sup>2,3</sup>

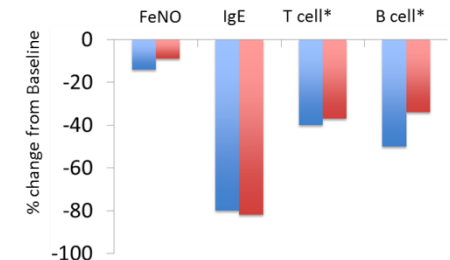

- (1) Corren J et al. Lebrikizumab treatment in adults with asthma. *N Engl J Med.* 2011 Sep 22;365(12):1088-98
- (2) Hanania NA, et al. Omalizumab in severe allergic asthma inadequately controlled with standard therapy: a randomized trial. *Ann Intern Med.* 2011 May 3;154(9):573-82
- (3) Djukanović R, et al. Effects of treatment with anti-immunoglobulin E antibody omalizumab on airway inflammation in allergic asthma. *Am J Respir Crit Care Med.* 2004 Sep 15;170(6):583-93

# “Preliminary” model-based insight obtained from Reference Subject

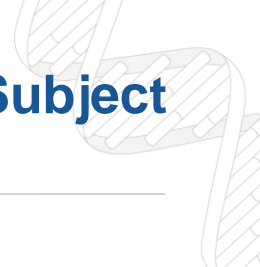

## Additional Testing of Reference Subject Behavior (no further fitting)

### Response to Dupilumab (anti-IL-4R $\alpha$ )

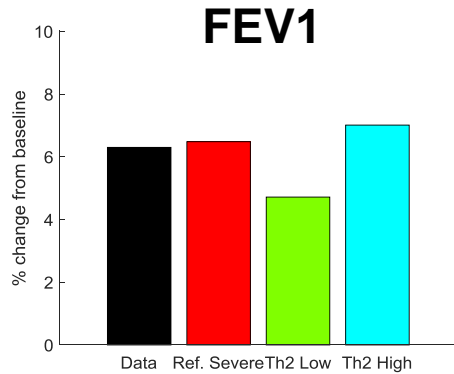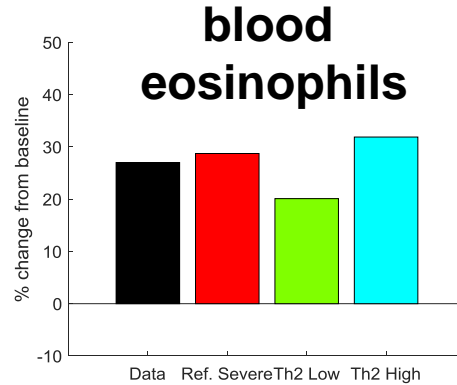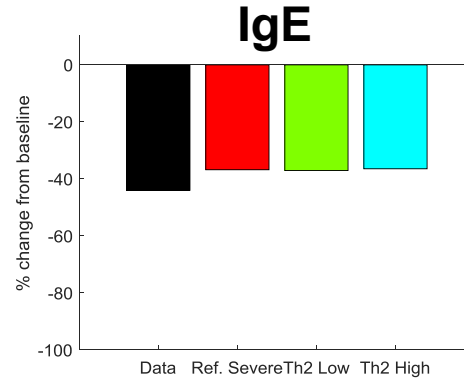

**Clinical Data (mean)\***  
**Severe (Avg. reference)**  
**Severe (Th2 Low reference)**  
**Severe (Th2 high reference)**

## Preliminary Exploration with the Reference Subjects

### Predictions for Novel Therapy

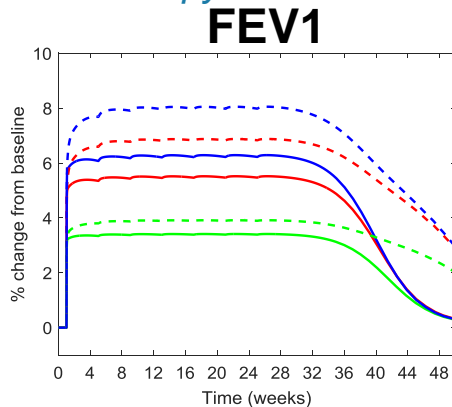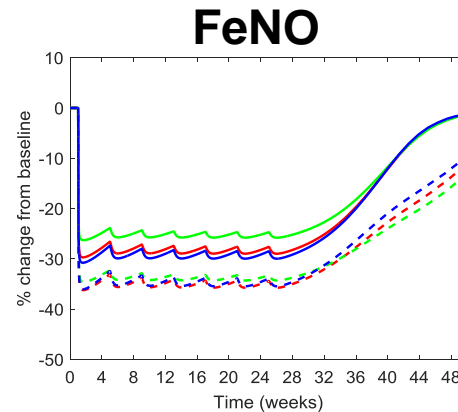

**Severe (Avg. reference)**  
**Severe (Th2 Low reference)**  
**Severe (Th2 high reference)**

— Lebrizumab 250 mg Q4W  
 - - - Novel Therapy 250 mg Q4W



# Exploration of variability and knowledge gaps: a unique and extremely important aspect of QSP-based work

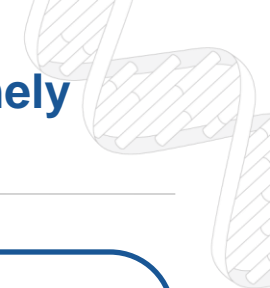

## Considerations

- Knowledge gaps typically explored via alternate model structures or alternate parameterizations; each instance a Virtual Subject
- Multiple Virtual Subjects may “behave” similarly to the known data– i.e, non-unique
- Collective available data utilized to develop the Virtual Population
- Testing against “new” data establishes predictive capability
- “Typical” QSP models are “sloppy”<sup>1</sup>: focus on ranges of predictions rather than parameter values

## Outcomes/learnings

- Robust QSP-based findings grounded in quantitative biology

1. Gutenkunst, R. N., J. J. Waterfall, et al. (2007). "Universally sloppy parameter sensitivities in systems biology models." *PLoS Comput Biol* **3**(10): 1871-1878.

# Workflow for developing a Virtual Population



## Developing the Virtual Cohort

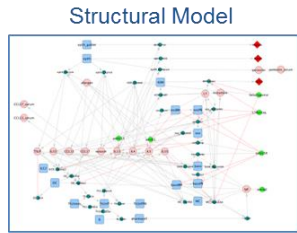

Parameter space,  $p$

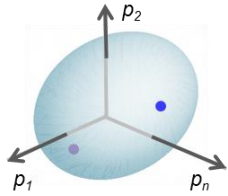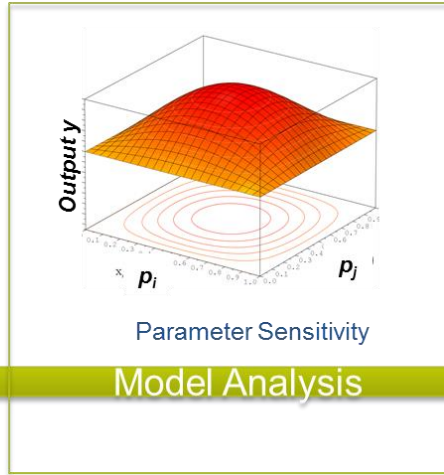

Physiological outcomes  
"Acceptance" Criteria

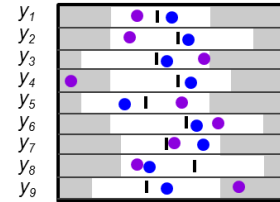

Virtual Subjects

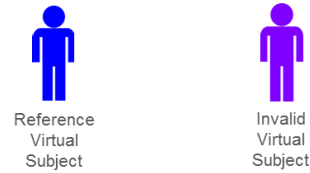

# Workflow for developing a Virtual Population

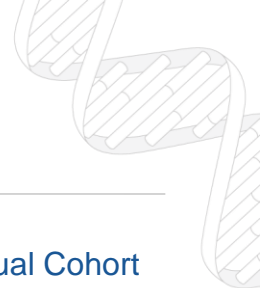

## Developing the Virtual Cohort

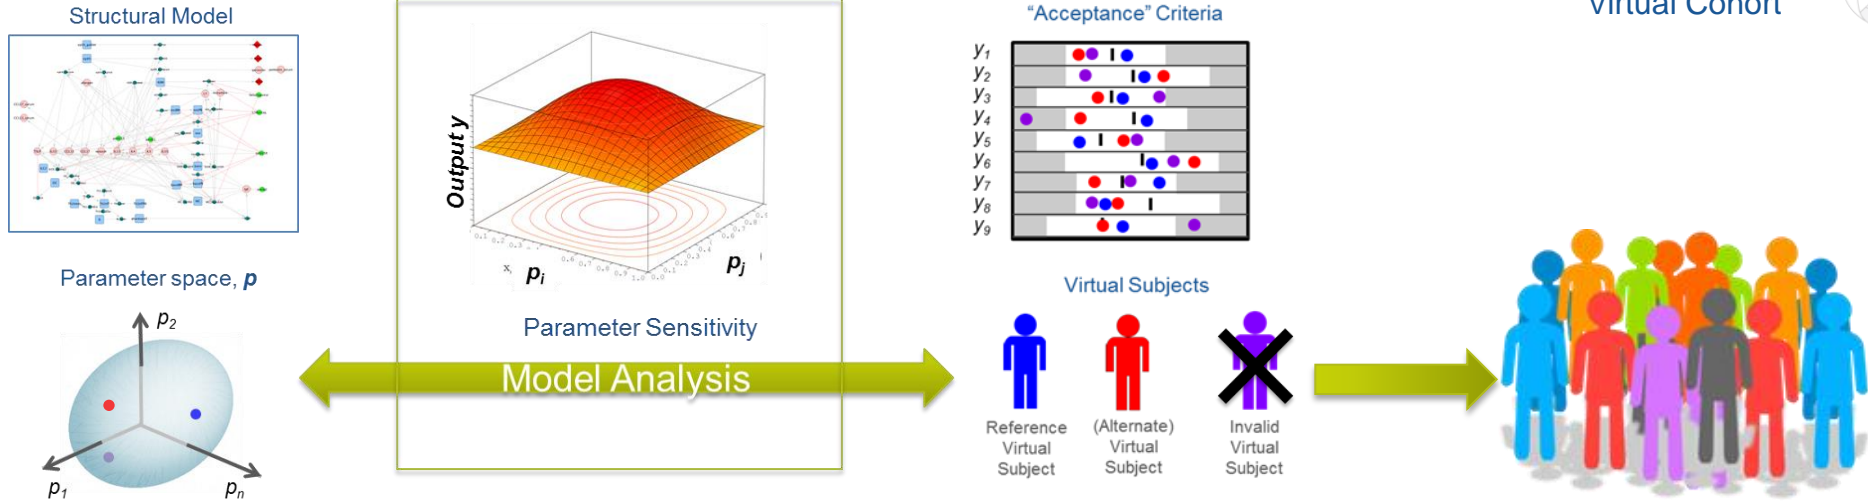

## Developing the Virtual Population

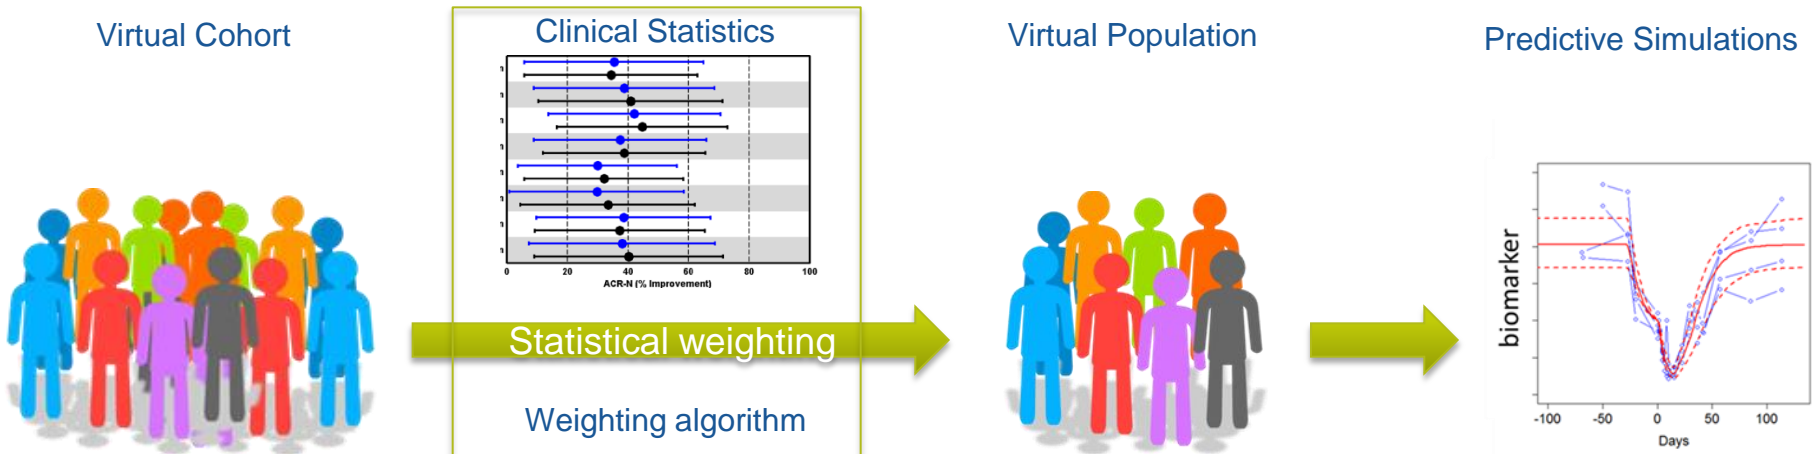

# Statistically weighed virtual population enables robust quantitative representation of a “real” clinical population

Each Virtual Subject in the Virtual Population assigned a “weight” corresponding to the probability of finding similar measurements in the clinical population

- The virtual population as a whole captures the observed statistics of the “true” clinical population of interest

The key statistics captured include:

- Mean and distribution of clinical measurements both as baseline and responses to interventions
- Observed correlations (or lack thereof) between measurements

The weights could either be binary (include/exclude) or be continuous (range from 0-1)

- Calculated using constrained optimization techniques to match the desired statistics

Virtual Population matching means & distributions of clinical populations

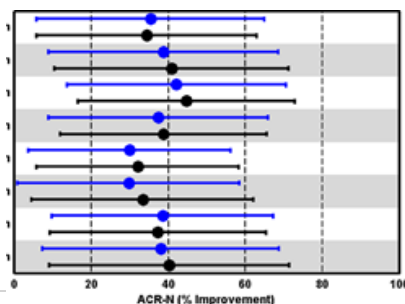

*Clinical data*  
*Virtual population*

Virtual Population captures correlation between biomarkers observed in clinical data

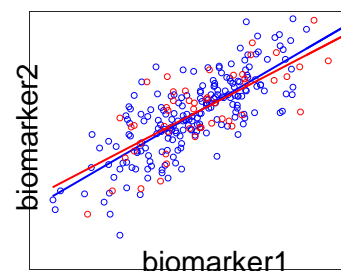

*Clinical data*  
*Virtual population*

# Case studies demonstrate implementation of proposed QSP workflow for Virtual Population

## QSP model for anti-PCSK9

- 6 states; 20 parameters
- High variability in patient clinical measures
- Different patient phenotypes (dyslipidemic, Familial hypercholesterolemics)
- Specific inclusion criteria in clinical trials
- Clinical data from multiple interventions

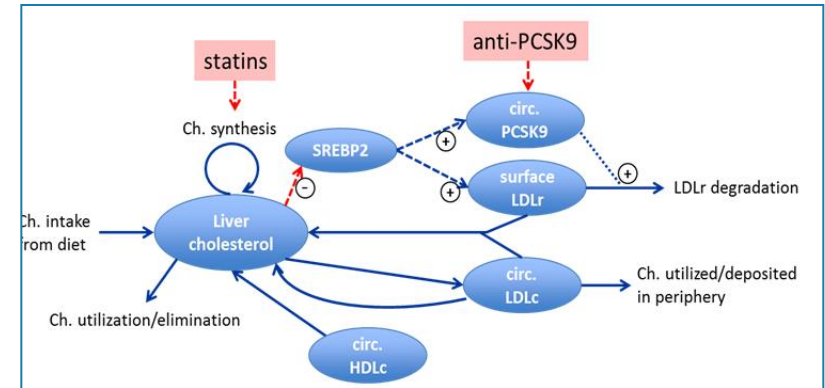

Gadkar et al, CPT-PSP 2014

## MAPK signaling model

- 15 states; 35 parameters
- Model developed primarily using in-vitro & preclinical data sets:
  - Protein signaling dynamics (e.g. pERK, pMEK) in response to inhibitor treatment in vitro
  - In vitro cell growth responses to inhibitors across panels of genetically diverse cell lines
  - In vivo (xenograft) responses to drug combos
- Limited clinical data available: Patient-level tumor growth response data from Phase1 clinical trials

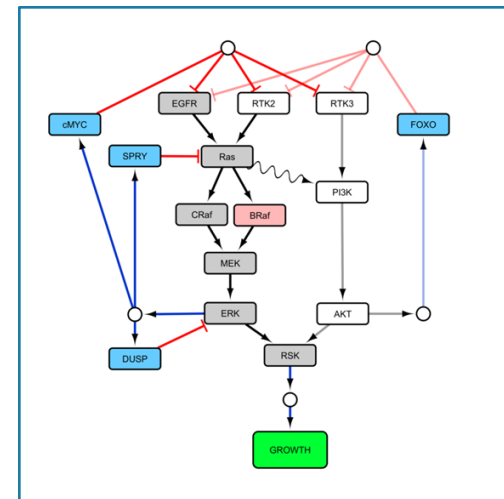

Kirouac, ACoP 2015

# Virtual Populations to address impact of background statin therapy to response to anti-PCSK9 and support trial design

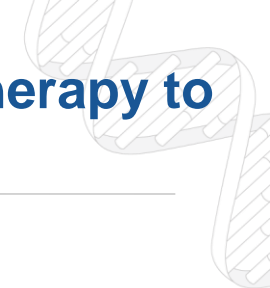

- Inclusion criteria for Phase II available for Virtual Population development
  - Expected LDLc for clinical population: Mean  $\pm$ SD = 125  $\pm$  25 mg/dL
  - Patients with/without statin background expected (two Vpops developed)
- Variability in response (both LDLc & PCSK9) to statin treatment for clinical population available

## Virtual population: development

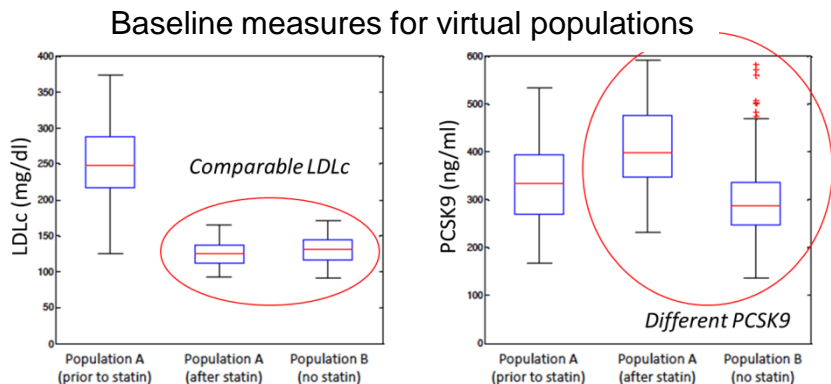

## Virtual population: application in research

Evaluation of statin background on response to anti-PCSK9

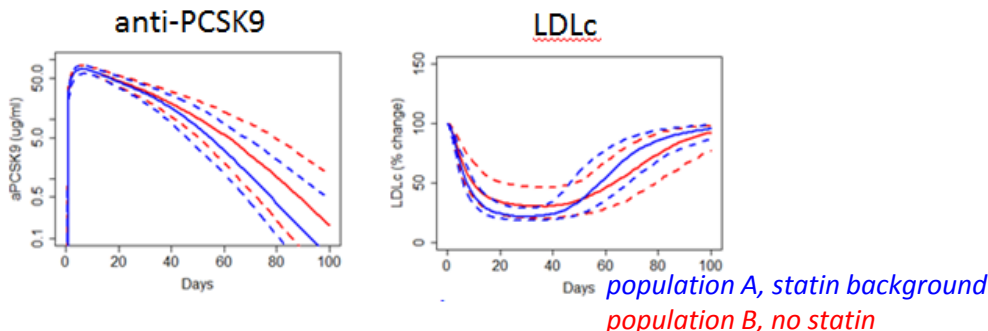

## Response to low dose atorvastatin

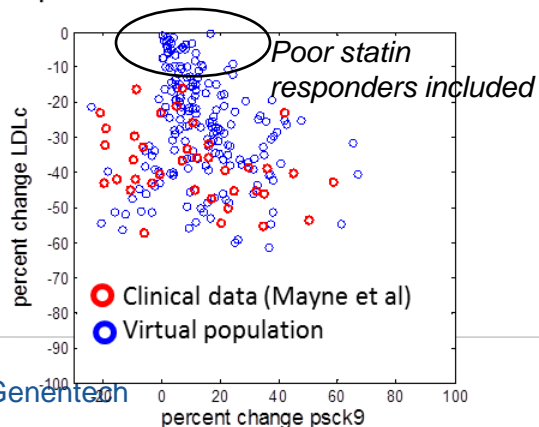

## Predictions for proposed Phase II dosing protocols

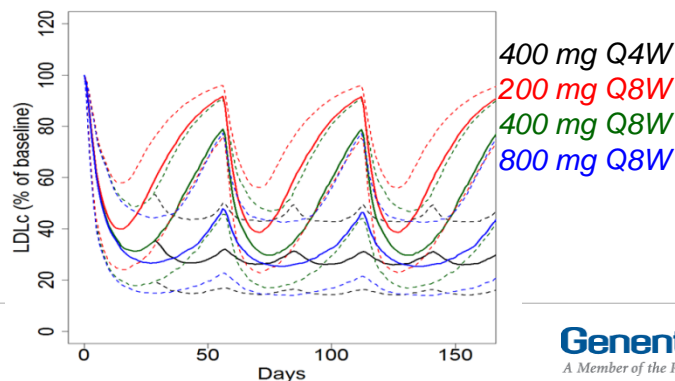

# Virtual Populations developed to evaluate response to anti-PCSK9 for a specific patient sub-phenotype

- The most common genetic defects in Familial hypercholesterolemia (FH) patients are *LDLr* mutations
  - Function LDLr activity in heterozygous FH is 10-25%
  - Function LDLr activity in homozygous FH is <5%
- FH patients have high LDLc levels
- Correlations of baseline LDLc & PCSK9 levels reported in literature (Raal et al. 2003)

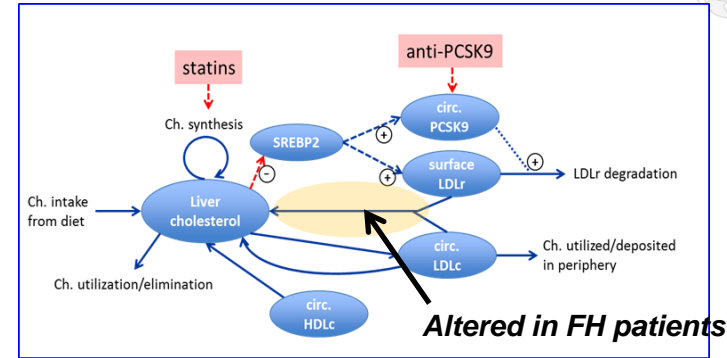

## Virtual population: development

LDLc-pcsk9 for Vpop

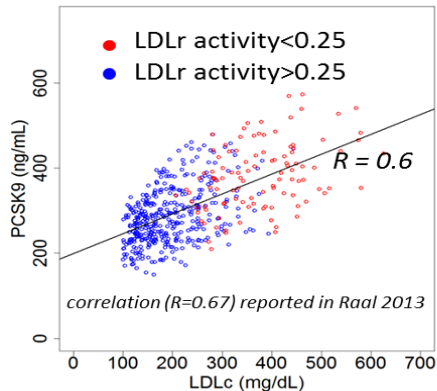

LDLc-LDLr for Vpop

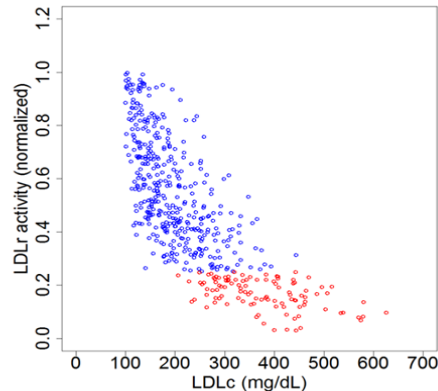

- Range of clinical measures (LDLc, PCSK9) at baseline consistent with expected enrollment in potential clinical study

## Virtual population: application in research

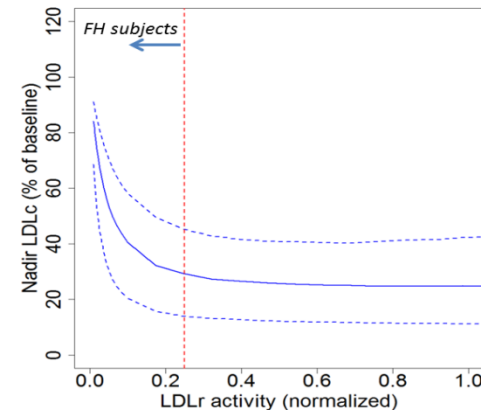

- QSP model predicts that response to anti-pcsk9 is compromised for FH subjects with LDLr activity less than 10% of normal

# Case studies demonstrate implementation of proposed QSP workflow for Virtual Population

## QSP model for anti-PCSK9

- 6 states; 20 parameters
- High variability in patient clinical measures
- Different patient phenotypes (dyslipidemic, Familial hypercholesterolemics)
- Specific inclusion criteria in clinical trials
- Clinical data from multiple interventions



Gadkar et al, CPT-PSP 2014

## MAPK signaling model

- 15 states; 35 parameters
- Model developed primarily using in-vitro & preclinical data sets:
  - Protein signaling dynamics (e.g. pERK, pMEK) in response to inhibitor treatment in vitro
  - In vitro cell growth responses to inhibitors across panels of genetically diverse cell lines
  - In vivo (xenograft) responses to drug combos
- Limited clinical data available: Patient-level tumor growth response data from Phase1 clinical trials

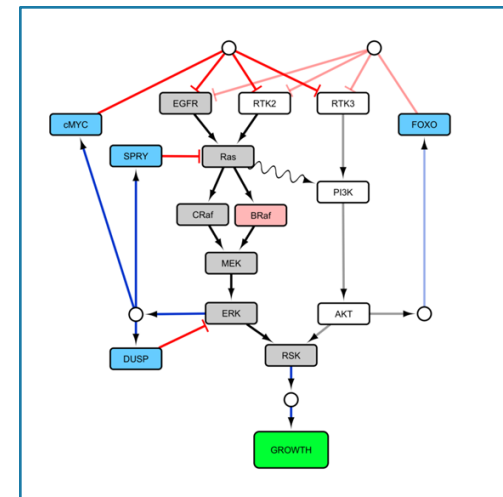

Kirouac, ACoP 2015



# Comparison across multiple single and combination therapies for MAPK pathway inhibitors

- Model developed using in-vitro & preclinical data
- Model translation to predict tumor size for a clinical population
  - Uncertainty in translation included
  - Greater intersubject tumor heterogeneity
  - Pharmacokinetic variability included

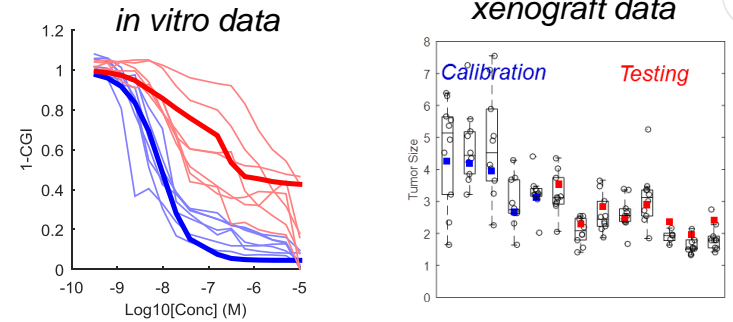

Representative figures for model calibration & testing

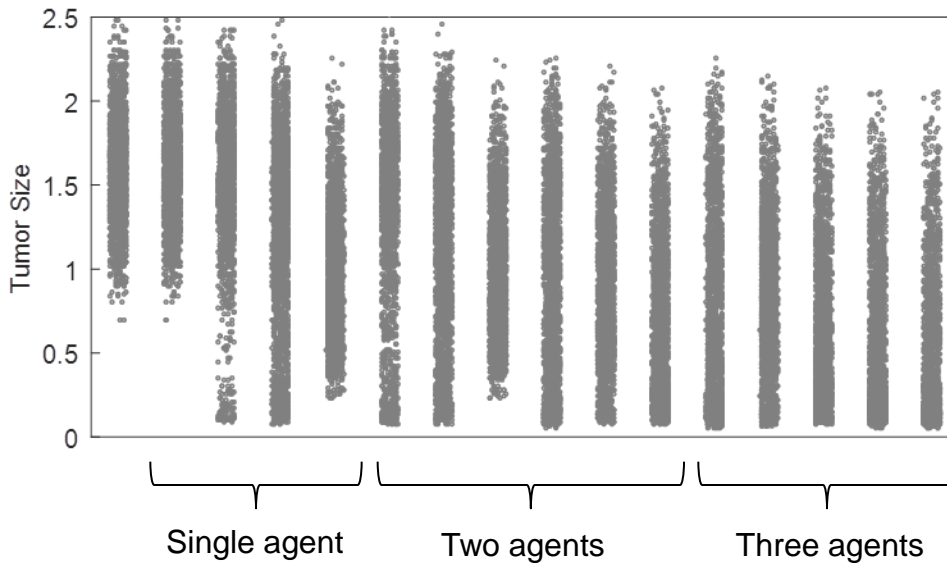

- Limited confidence in predictive capability with Virtual Cohort

- Virtual Subjects

# Comparison across multiple single and combination therapies for MAPK pathway inhibitors

- Model developed using in-vitro & preclinical data
- Model translation to predict tumor size for a clinical population
  - Uncertainty in translation included
  - Greater intersubject tumor heterogeneity
  - Pharmacokinetic variability included



Representative figures for model calibration & testing

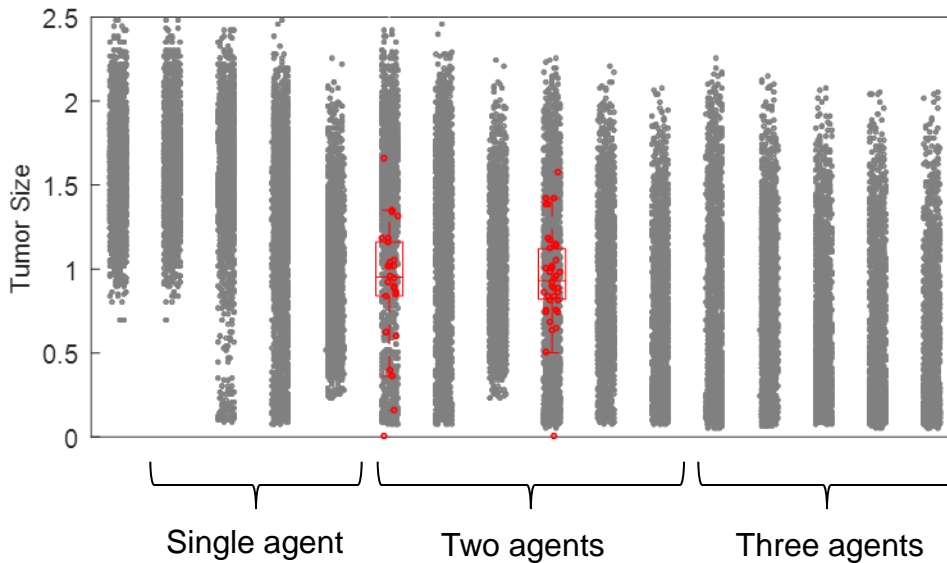

- Limited confidence in predictive capability with Virtual Cohort
- Clinical data available for two protocols utilized for weighting to generate the Virtual Population

- Virtual Subjects
- Clinical data

# Comparison across multiple single and combination therapies for MAPK pathway inhibitors

- Model developed using in-vitro & preclinical data
- Model translation to predict tumor size for a clinical population
  - Uncertainty in translation included
  - Greater intersubject tumor heterogeneity
  - Pharmacokinetic variability included



Representative figures for model calibration & testing

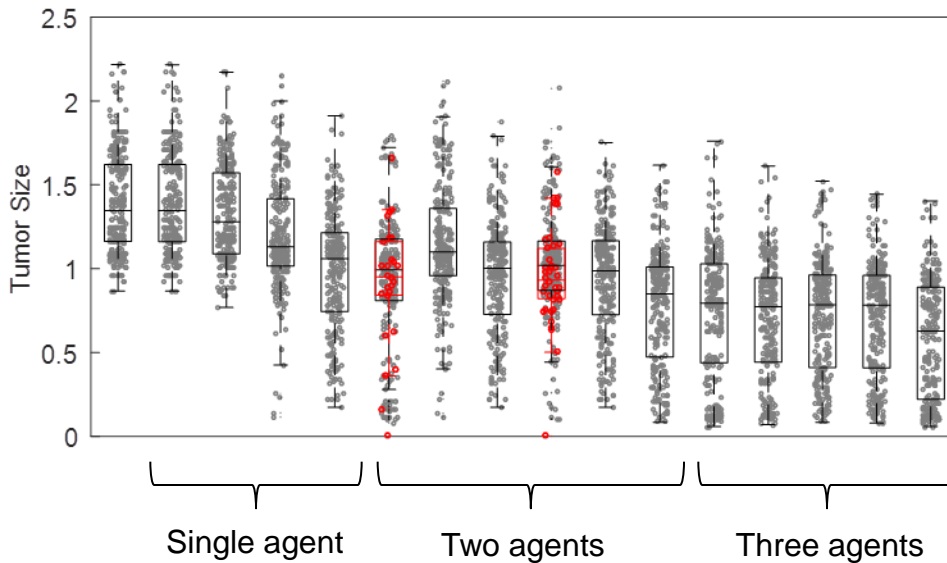

- Limited confidence in predictive capability with Virtual Cohort
- Clinical data available for two protocols utilized for weighting to generate the Virtual Population
- Increase in quantitative confidence in predictions with Virtual Population

- Virtual Subjects
- Clinical data

# Frequently Asked Questions of QSP models in the context of uncertainty & variability

- *How can you build a model of biology we don't quite understand? What about competing hypotheses? Conflicting data?*
- *With enough parameters you can fit an elephant. The model is underspecified and the parameters are not identifiable.*
- *How do we evaluate and interpret this work? To what extent should we trust the predictions?*

# Acknowledgements

---

## Genentech, South San Francisco

Saroja Ramanujan – QSP Group Lead

Daniel Kirouac

Iraj Hosseini

PCSK9 QSP working group

Asthma QSP working group

MAPK Signaling QSP working group

## External Collaborators & Advisors

Piet van der Graaf

Don Mager

# Backup slides

---

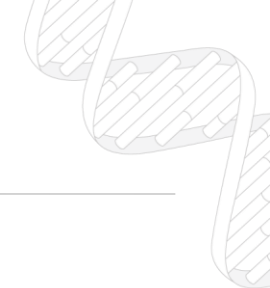



### Common distinguishing features of QSP approaches

- A coherent mathematical representation of key biological connections in the system of interest, consistent with the current state of knowledge
- A general prioritization of necessary biological detail over parsimony potentially including detail at the genetic, protein, cellular, tissue, organ, and whole-body scales
- Consideration of complex systems dynamics resulting from biological feedbacks, cross-talk, and redundancies
- Integration of diverse data, biological knowledge, and hypotheses
- A representation of the pharmacology of relevant therapeutic interventions
- The ability to perform quantitative hypothesis exploration and testing via biology-based simulation in virtual “subjects” (e.g., humans, animals, cells)

*Ramanujan, Gadkar, Kadambi 2015*

# Robust scoping effort determines the biology to be included in the QSP model & collection of diverse data sets for development

## Model schematic developed from current knowledge & input from biology experts

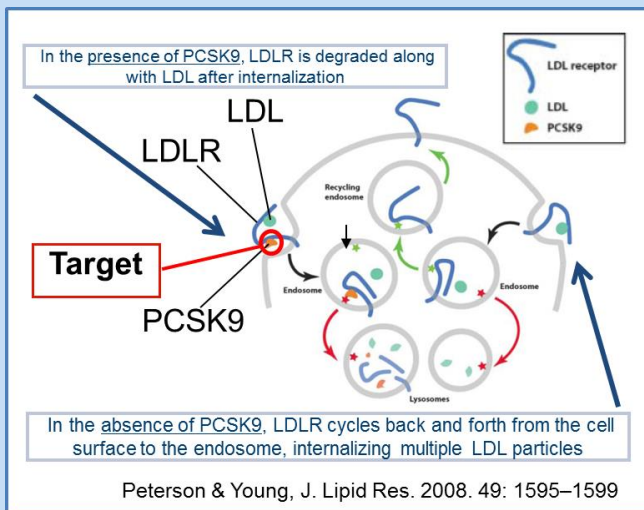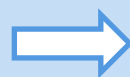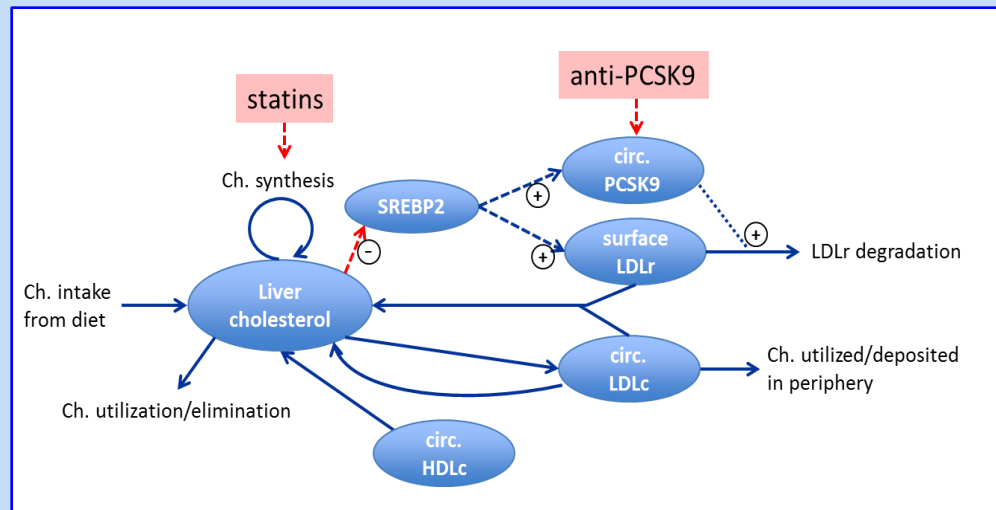

### Biological Mechanisms & Behaviors

- Untreated hepatic cholesterol balance
- LDLr synthesis/degradation including regulation by PCSK9
- LDL synthesis and uptake via LDLr
- SREBP2 regulation of PCSK9 & LDLr expression
- Anti-PCSK9 binding of PCSK9
- Statin inhibition of cholesterol synthesis

### Available data

#### Preclinical data

- Impact of pcsk9 on LDLr in vitro
- Regulation of pcsk9 and LDLr via SREBP2 in vitro
- LDLr specific vs non-specific LDL clearance in animal models

#### Patient populations

- pcsk9 & LDLc levels in dyslipidemia, familial hypercholesterolemia
- Kinetics of hepatocyte cholesterol regulation, apoB-100 particle dynamics, etc

#### Statin clinical data (Jupiter & TNT studies)

- Change in LDLc with statins
- Changes in pcsk9 levels on statins and correlations with other biomarkers

#### Anti-pcsk9 clinical data (Genentech Phase I study)

- Phase I clinical data for anti-pcsk9, total pcsk9, LDLc profiles for monotherapy and combo with statins



# Mechanism based Asthma disease model supporting Genentech pipeline for target validation, molecule selection & biomarker evaluation

## Representing the biology

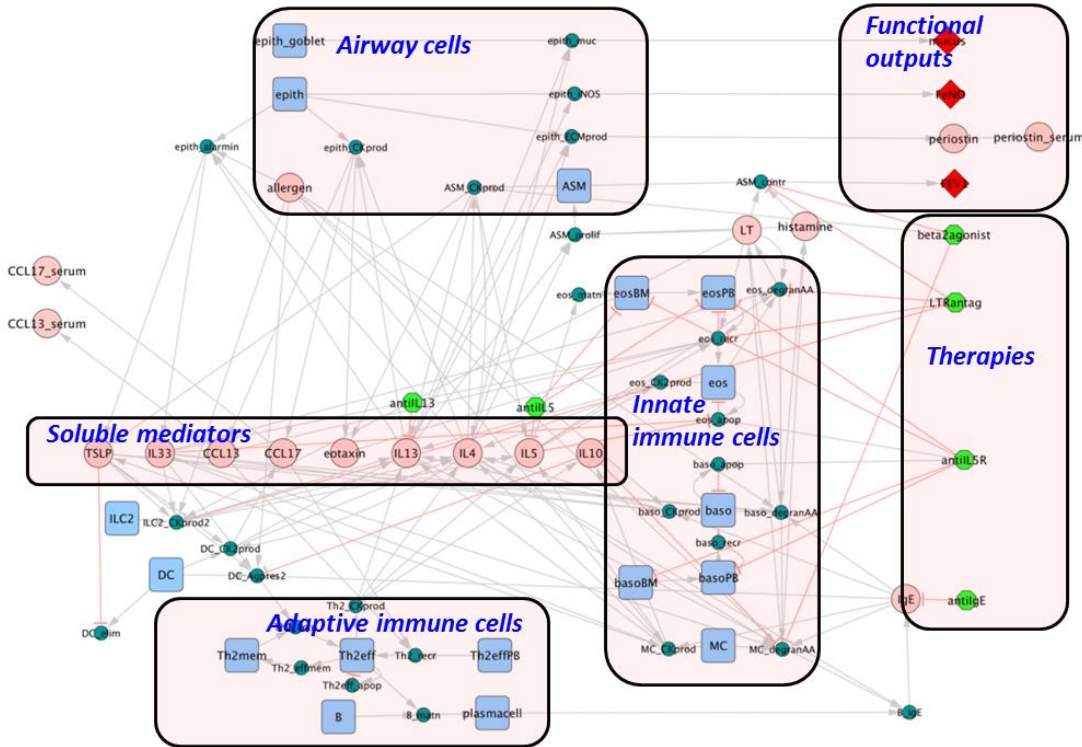

## Capturing the “reference” behavior

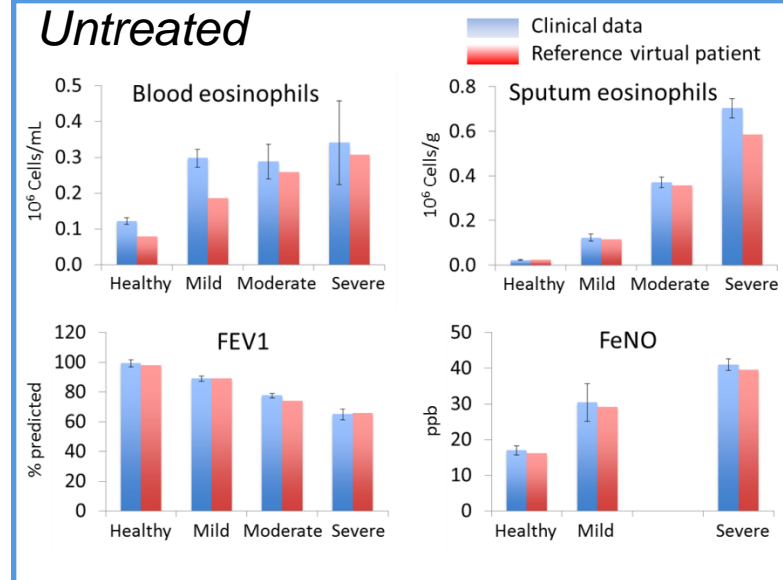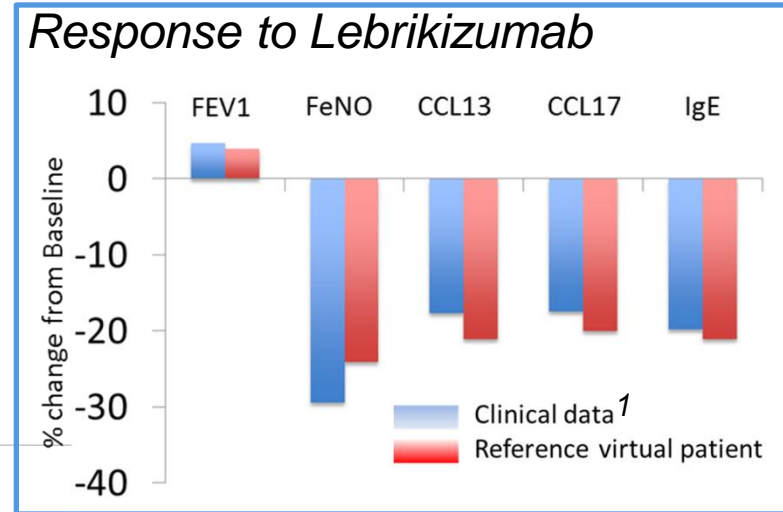

1 Corren J et al. Lebrikizumab treatment in adults with asthma. *N Engl J Med.* 2011 Sep 22;365(12):1088-98  
©2015 Genentech

# Workflow & Technical Methodologies: Six Stages of QSP model development and Implementation

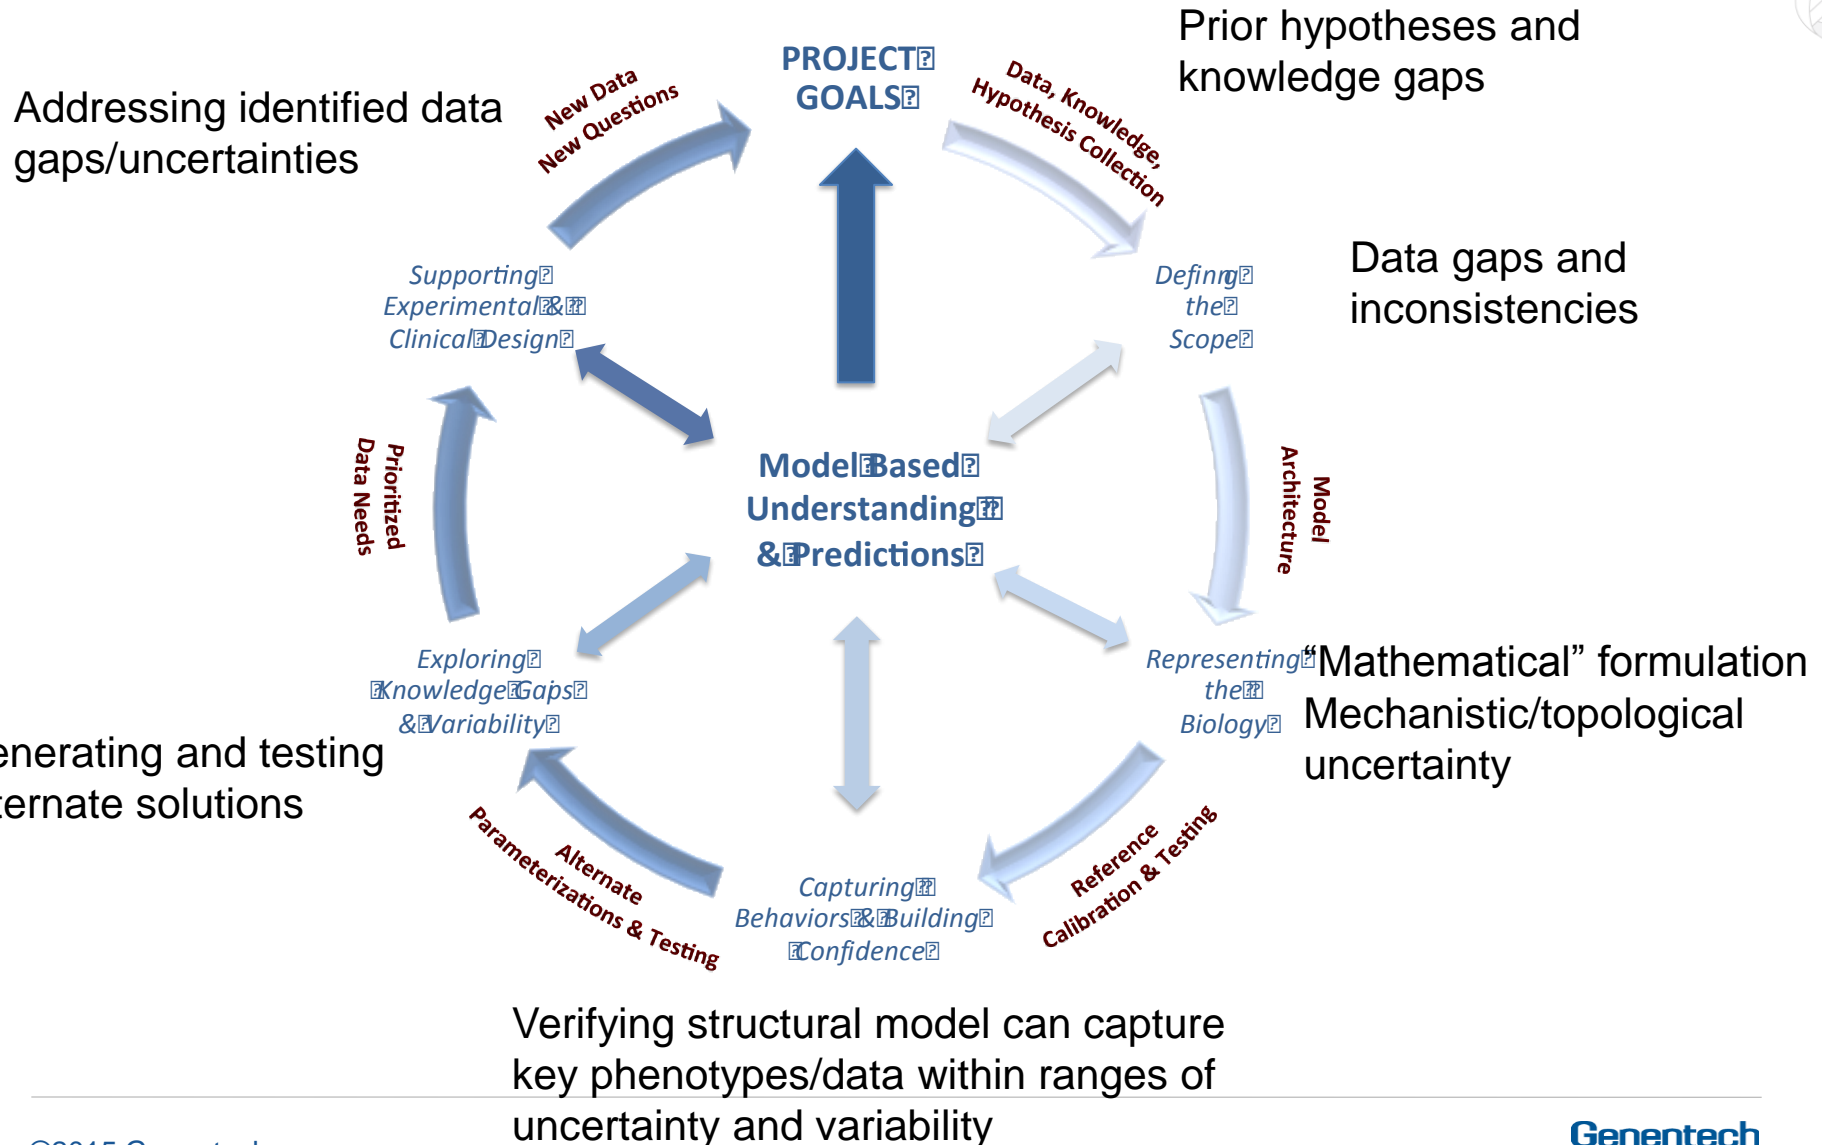

# Quantitative Systems Pharmacology: Terminology for this talk

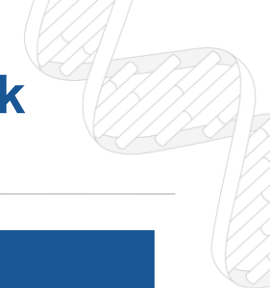

| Term                                                           | Definition                                                                                   | Attributes                                                                                                                   |
|----------------------------------------------------------------|----------------------------------------------------------------------------------------------|------------------------------------------------------------------------------------------------------------------------------|
| <b>QSP Model</b><br>(for tools described in this presentation) | ODE based: $\dot{X} = f(X, p, t)$<br>Logic/algebraic based: $X = f(X, p, t)$                 | $X$ : states/species<br>$p$ : parameters                                                                                     |
| <b>Physiological Outcome</b>                                   | Any quantity calculated from model for which experimental data available                     |                                                                                                                              |
| <b>Virtual Subject</b>                                         | A single parameterization of the model                                                       | All physiological outcomes are within available data                                                                         |
| <b>Reference Subject</b>                                       | A Virtual Subject that exhibits simulated behaviors representative of a specific phenotype   |                                                                                                                              |
| <b>Virtual Cohort</b>                                          | A collection of virtual subjects                                                             |                                                                                                                              |
| <b>Virtual Population</b>                                      | A collection of virtual subjects that is selected to match a “real” population               | A subset of the Virtual Cohort that is selected or weighted to match statistical properties of experimental or clinical data |
| <b>Statistical (prevalence) Weighting</b>                      | Assignment of weights to different Virtual Subjects in a Virtual Population                  | The resulting weighted simulation results capture statistical features of experimental data                                  |
| <b>Variability</b>                                             | Subject to subject differences in mechanistic biology and/or phenotypic behaviors            |                                                                                                                              |
| <b>Uncertainty or Knowledge Gap</b>                            | Areas of qualitative or quantitative uncertainty in mechanistic biology, phenotypic profiles |                                                                                                                              |
