# Supplementary material for: Methodologies for Quantitative Systems Pharmacology (QSP) Models: Design and Estimation
Source: PubMed Central journal article supplement — CPT Pharmacometrics Syst Pharmacol. 2017 Jul 11;6(8):496–8. doi: 10.1002/psp4.12206 (PMC5572127; doi:10.1002/psp4.12206), 2017-07-11
Supplement: PSP4-6-496-s002.pdf [file PSP4-6-496-s002.pdf]

# Optimal Granularity in QSP Model Structures

## The **Pros** and **Cons** of **Model Complexity** In **Cardiac Simulations**

**Dr Steven Niederer**  
**King's College London**

# Quantitative **Systems Pharmacology**

**Population variation**

**Interspecies variation**

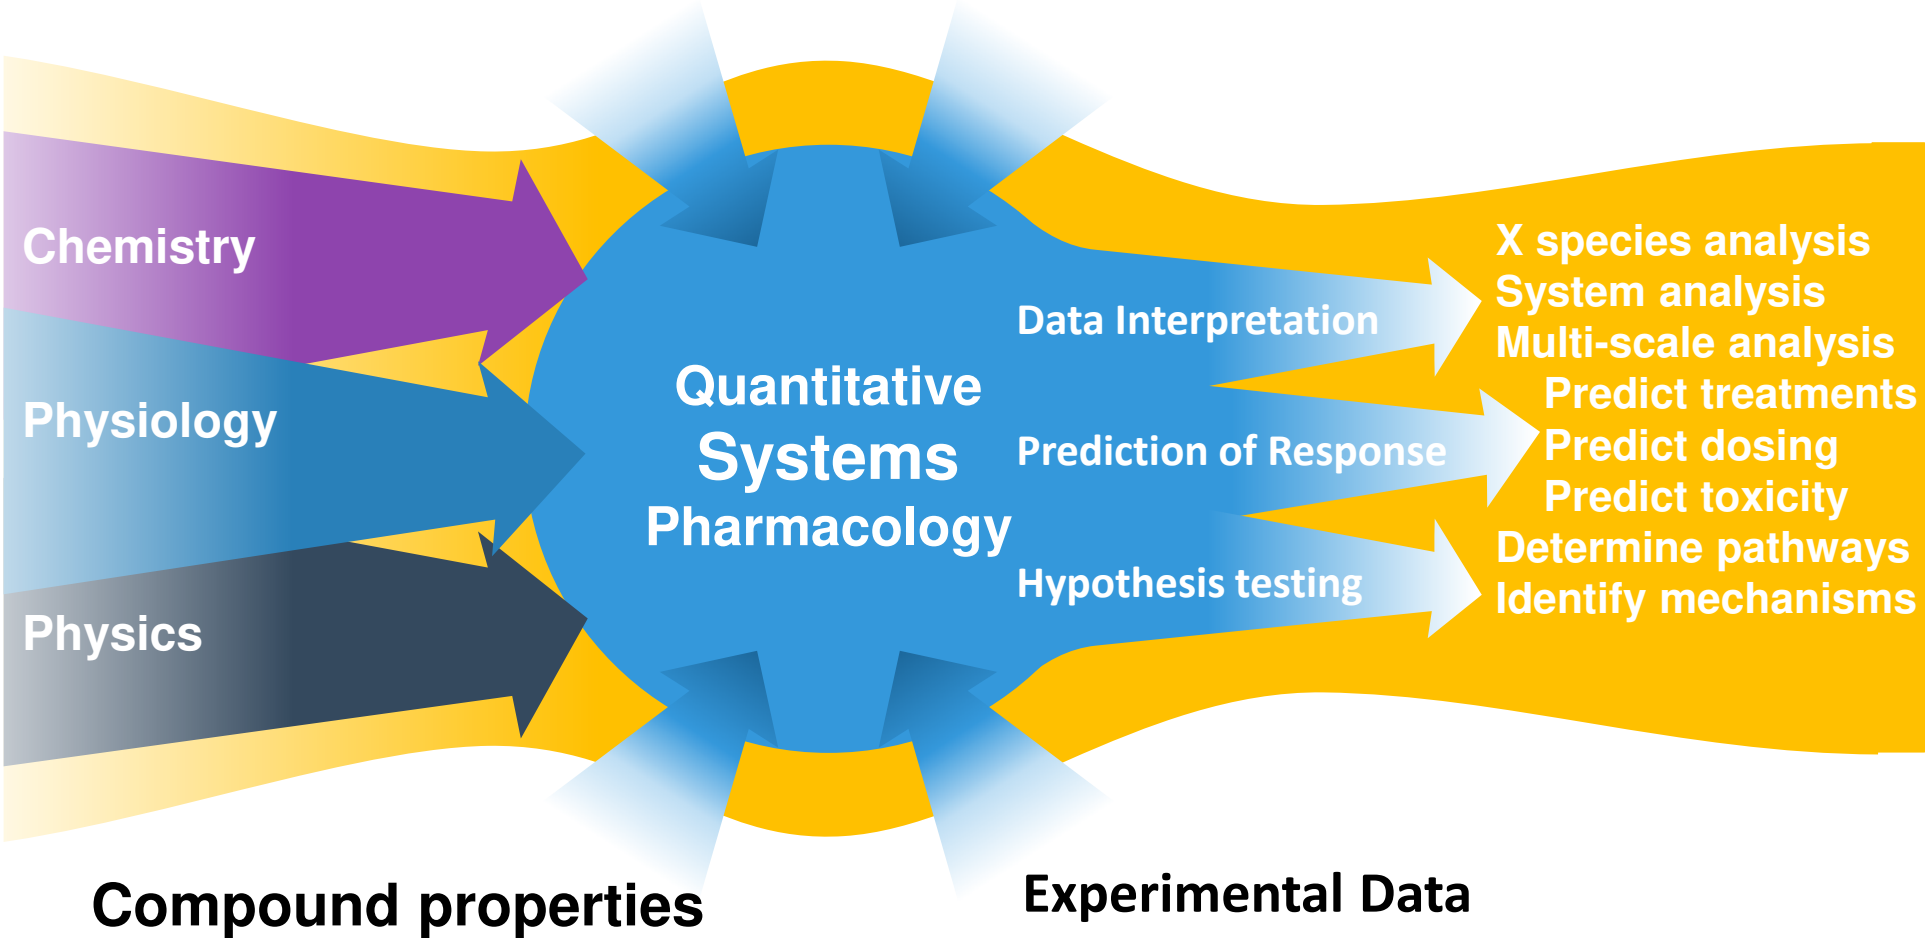

# What systems are involved?

## Organ

### Cell

#### Regulatory pathways

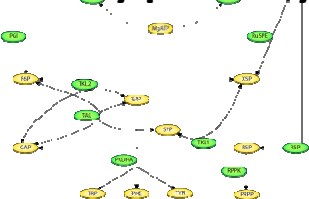

#### Mitochondria

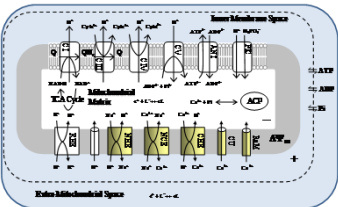

#### Fenton Chemistry...

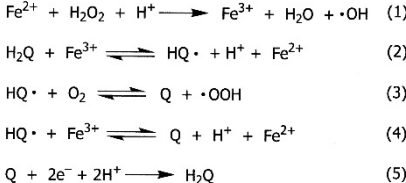

#### Contraction

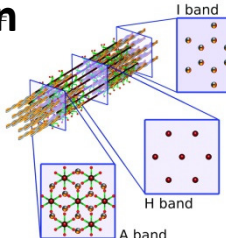

#### Contraction

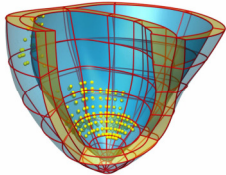

#### Calcium dynamics

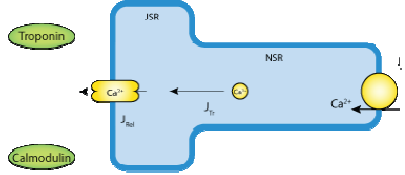

#### Fluids

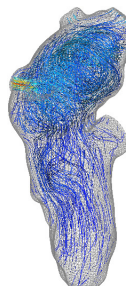

#### Electrophysiology

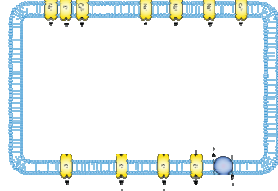

#### Electrophysiology

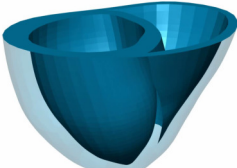

# What Level of Granularity is Required in Time?

## Acute Toxicity (<1 minute)

Arrhythmia, QT prolongation

## Metabolic Time scales (15-30 minutes)

Acute mitochondria dysfunction

## Chronic Lab Toxicity (2weeks – 6 months animal, in-vitro prep)

Change in protein expression level

Compromised metabolism

## Chronic Clinical Toxicity (1+ years patients)

Decreased ejection fraction

Heart failure

**Anthracycline Toxicity**



Time

**Do we need to model a system representative of the population or do we need to model the population ?**

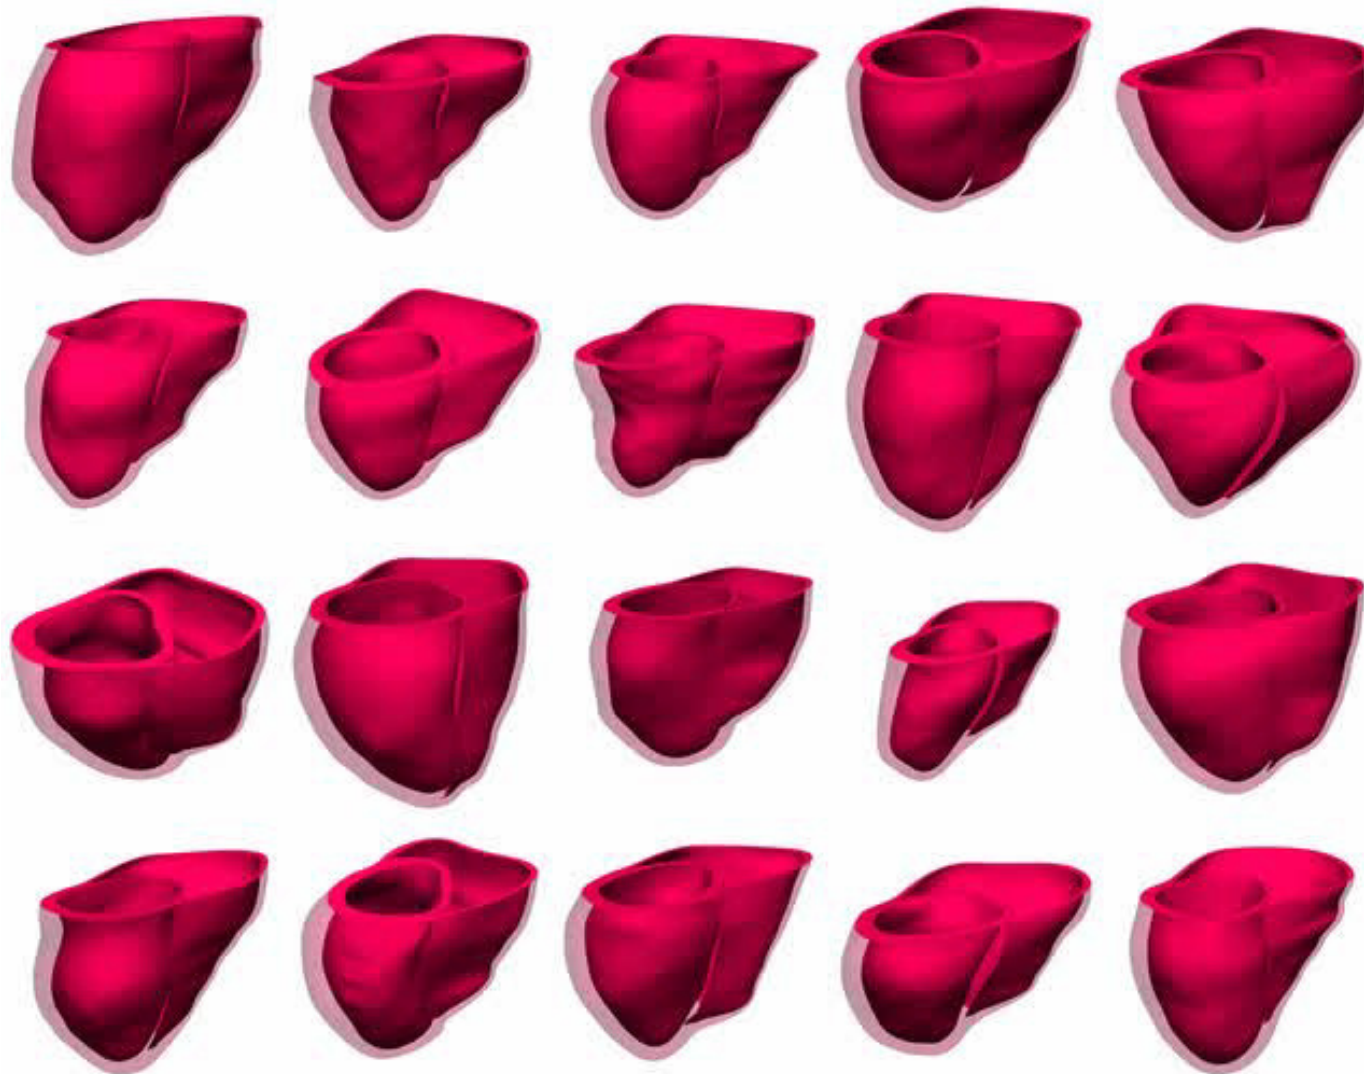

# Is there a cost of complexity?

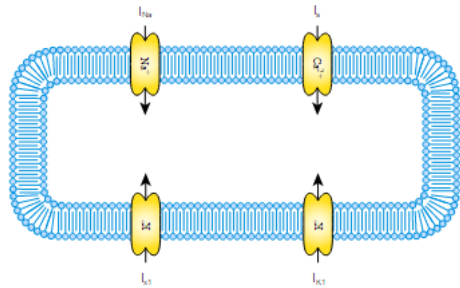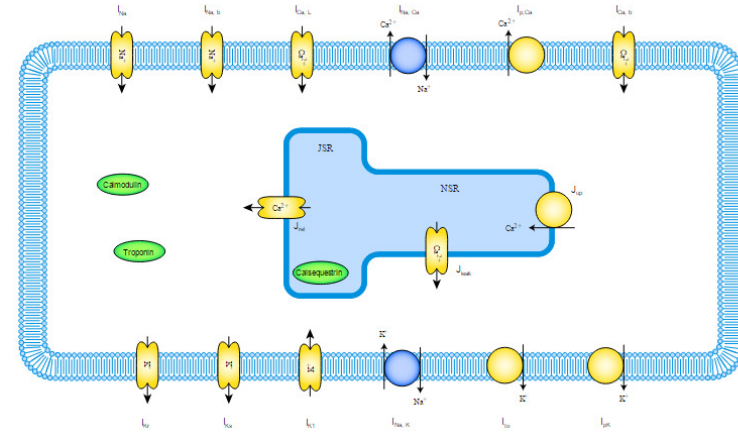

Accessing correct implementations of the equations

Cellml

(100+ cardiac cell models)

SBML

(34 cardiac cell models)

**Functional Curation allows automated checking of implementations**

Cooper J, Mirams GR & Niederer SA. (2011). High-throughput functional curation of cellular electrophysiology models. *Prog Biophys Mol Biol* **107**, 11-20. <https://travis.cs.ox.ac.uk/FunctionalCuration/>

**In physiology studies there is a saying:  
We only learn something when the model breaks**

An error has occurred: To continue :

Press ENTER to return to your Model, or

Press CTRL + ALT + DEL to restart you simulation

**However, if using the model as a tool we  
simply learn that the tool does not work**

# Complex models are not a single entity

Complex models combine multiple simpler components into a single framework

Complex models (should) rely on more data to constrain parameters and **Comprehensively validate the model**



# Fine Model Granularity

## PROS

- Aspire to be closer representation of biology
- Easy access to model equations
- Compute time often reasonable

## CONS

- Hard to determine what has gone wrong when they break
- Built from distinct components and not comprehensively validated
- Validation is often against easily measurable phenotypes

# Finding the ~~limitations~~ opportunities of complex models through the model creation process

Case Study:

## Modelling the Rat Ventricular Myocyte

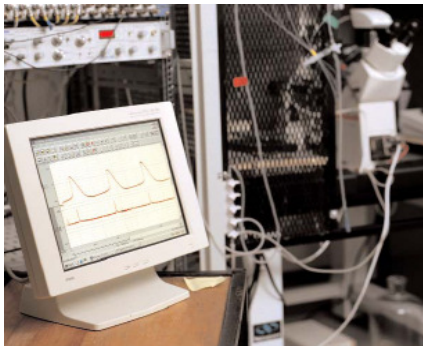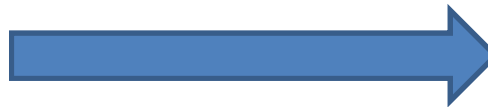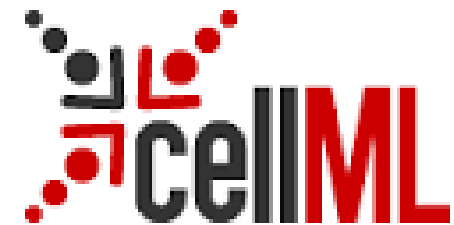

# Wish to model electro-mechanics whole rat heart

1. Biphasic calcium frequency response
2. Able to operate at physiological (6Hz+) frequency
3. Simulate at physiological temperatures

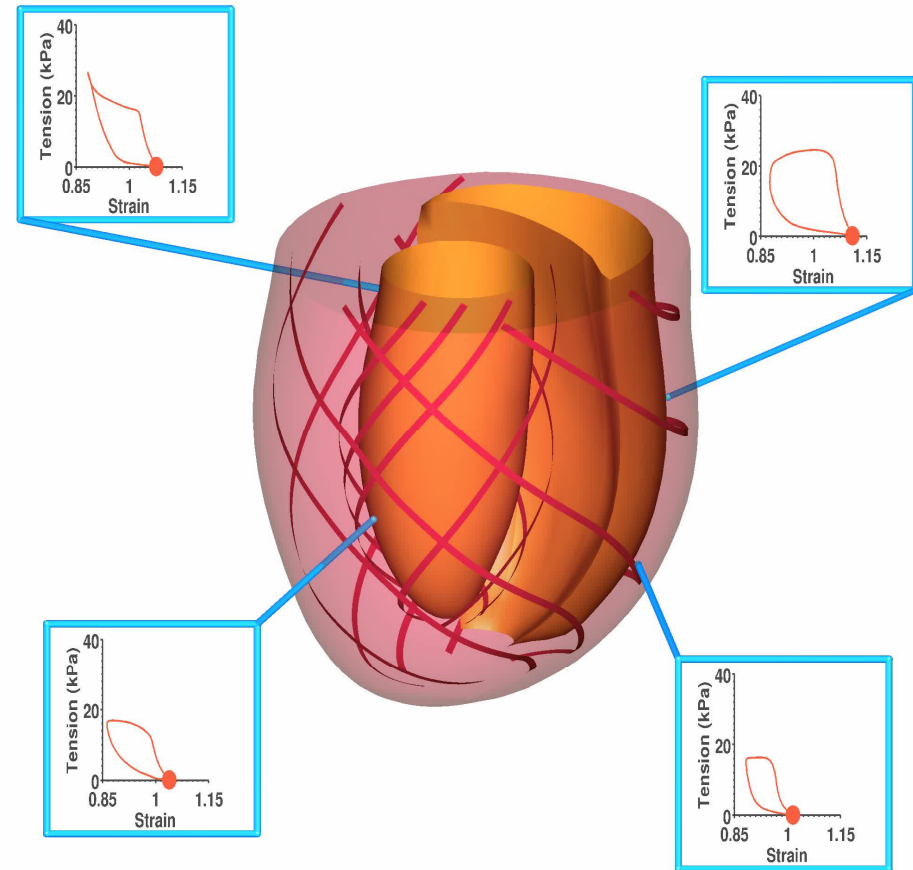

# Using the rat as an example

How are we currently modelling the rat ventricular myocyte?

Pandit 2001

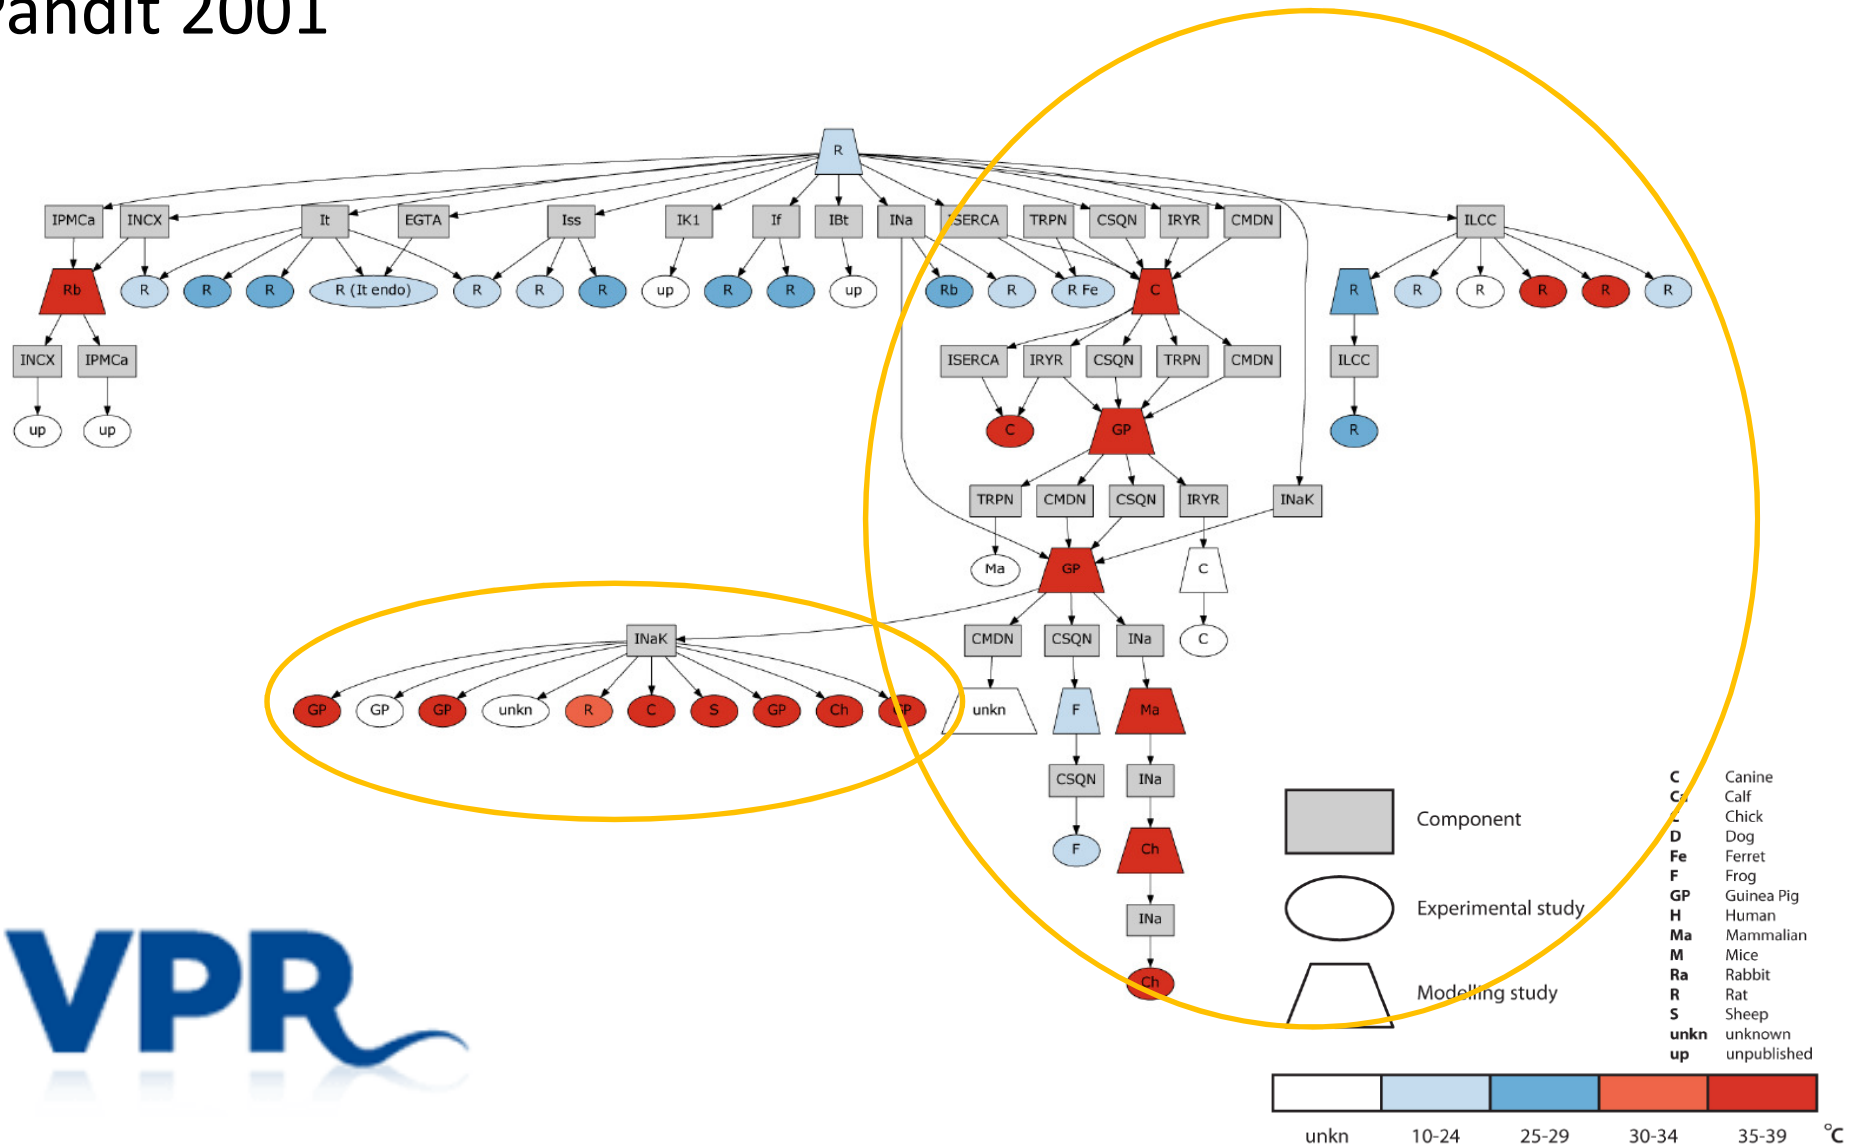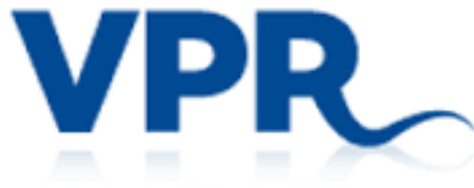

# Modelling the Sodium Potassium pump

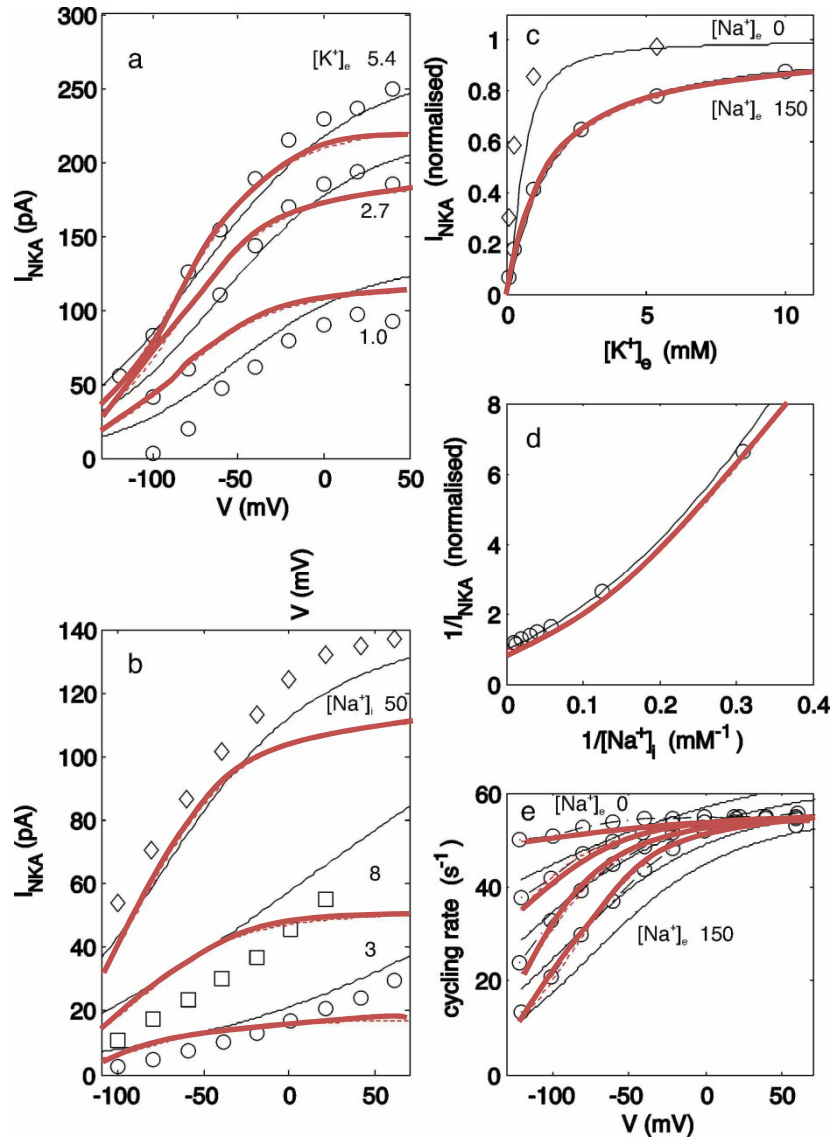

Nakao & Gadsby (1989)

Luo & Rudy (1991)

Phenomenological Model

Incompatible with compound binding

# Modelling Protein Function

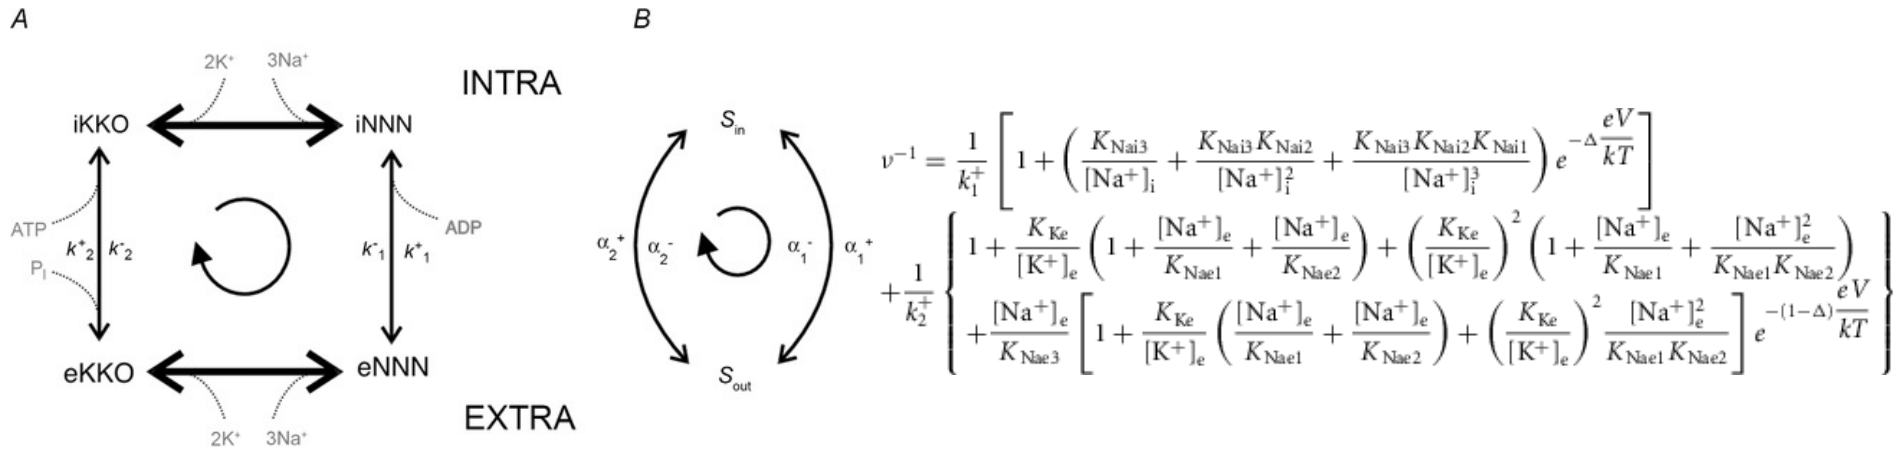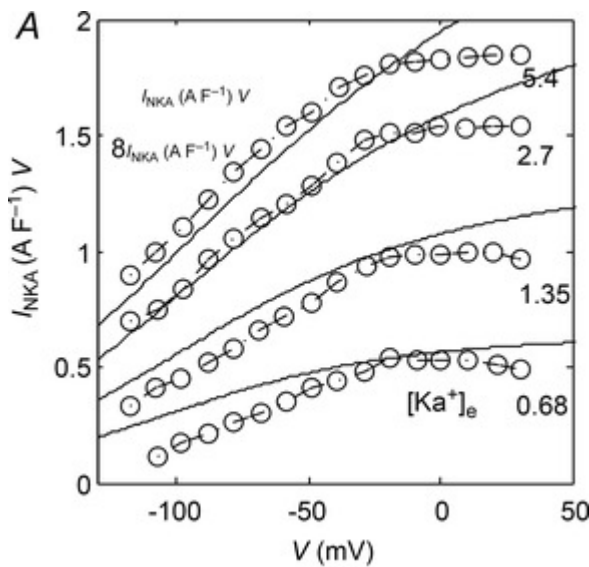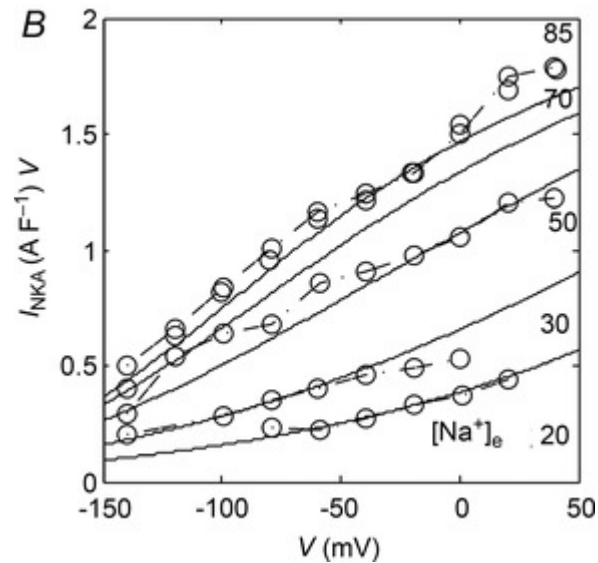

Lewalle A, Niederer SA & Smith NP. (2014). Species-dependent adaptation of the cardiac Na<sup>+</sup>/K<sup>+</sup> pump kinetics to the intracellular Na<sup>+</sup> concentration. *The Journal of Physiology* **592**, 5355-5371.

# Hinch Model of rat calcium regulation with graded calcium release

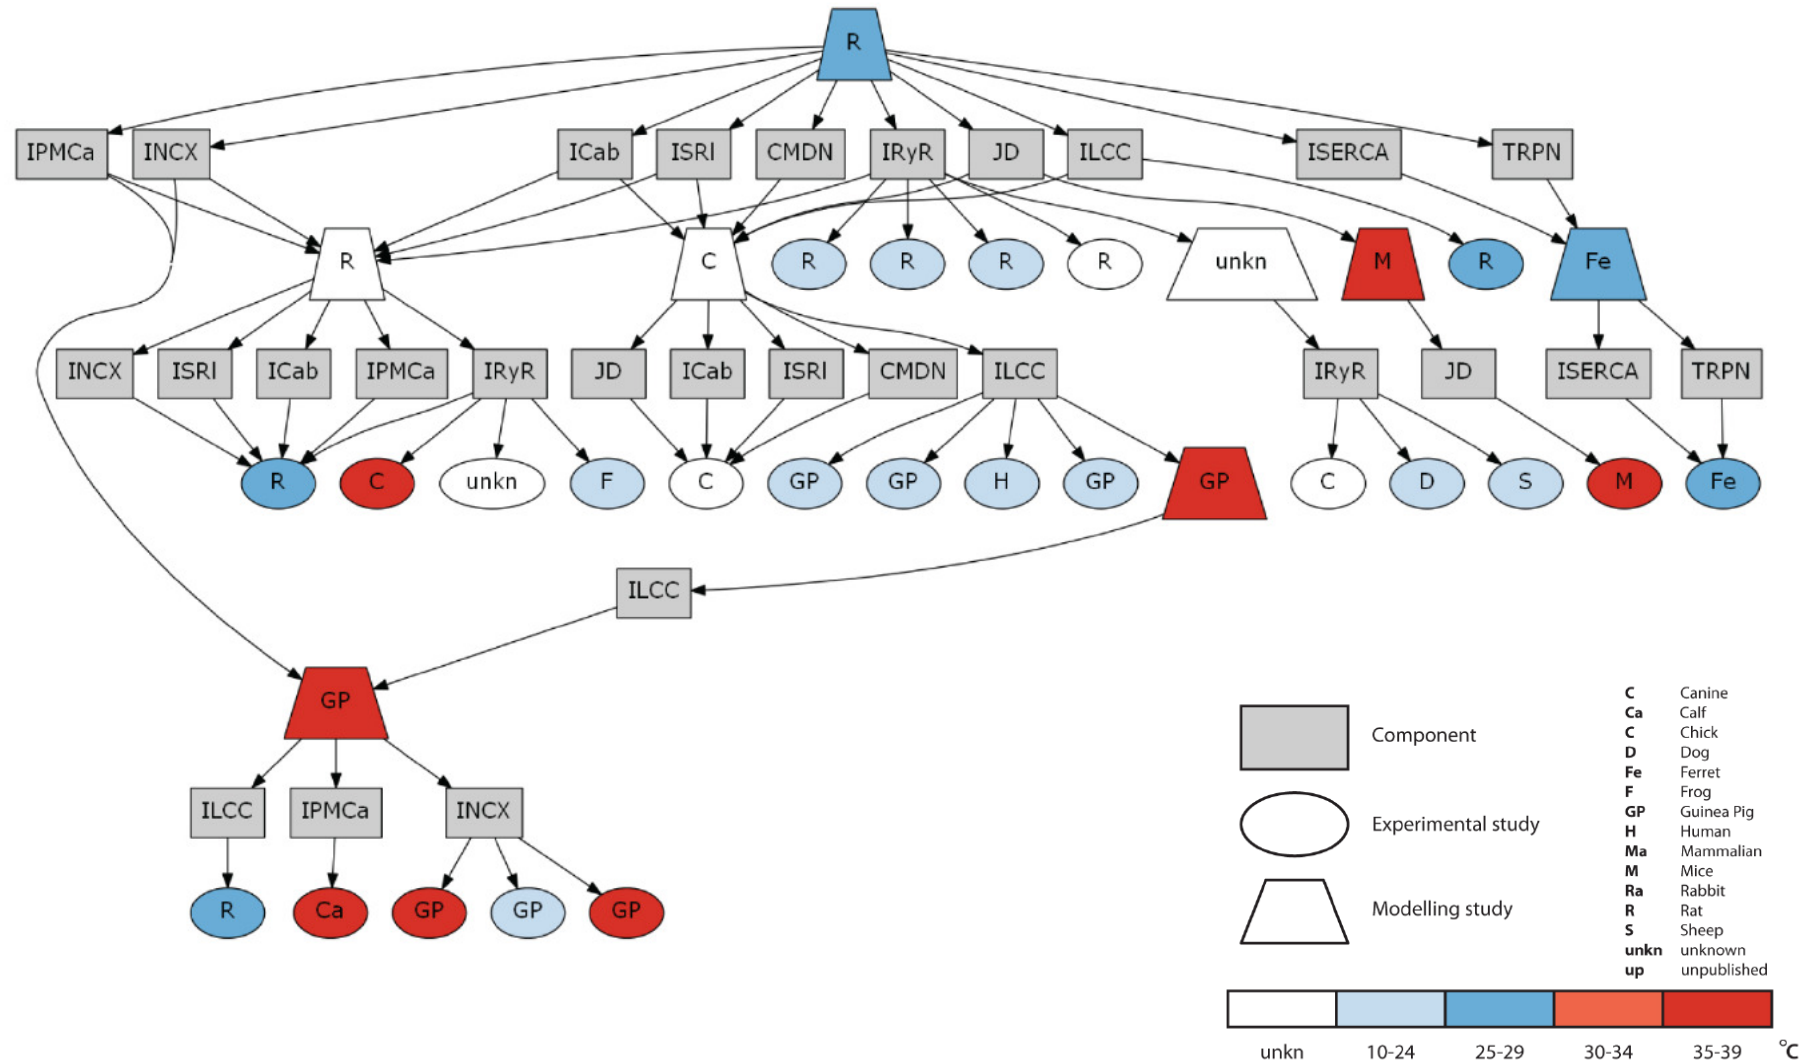

# Calcium Dynamics

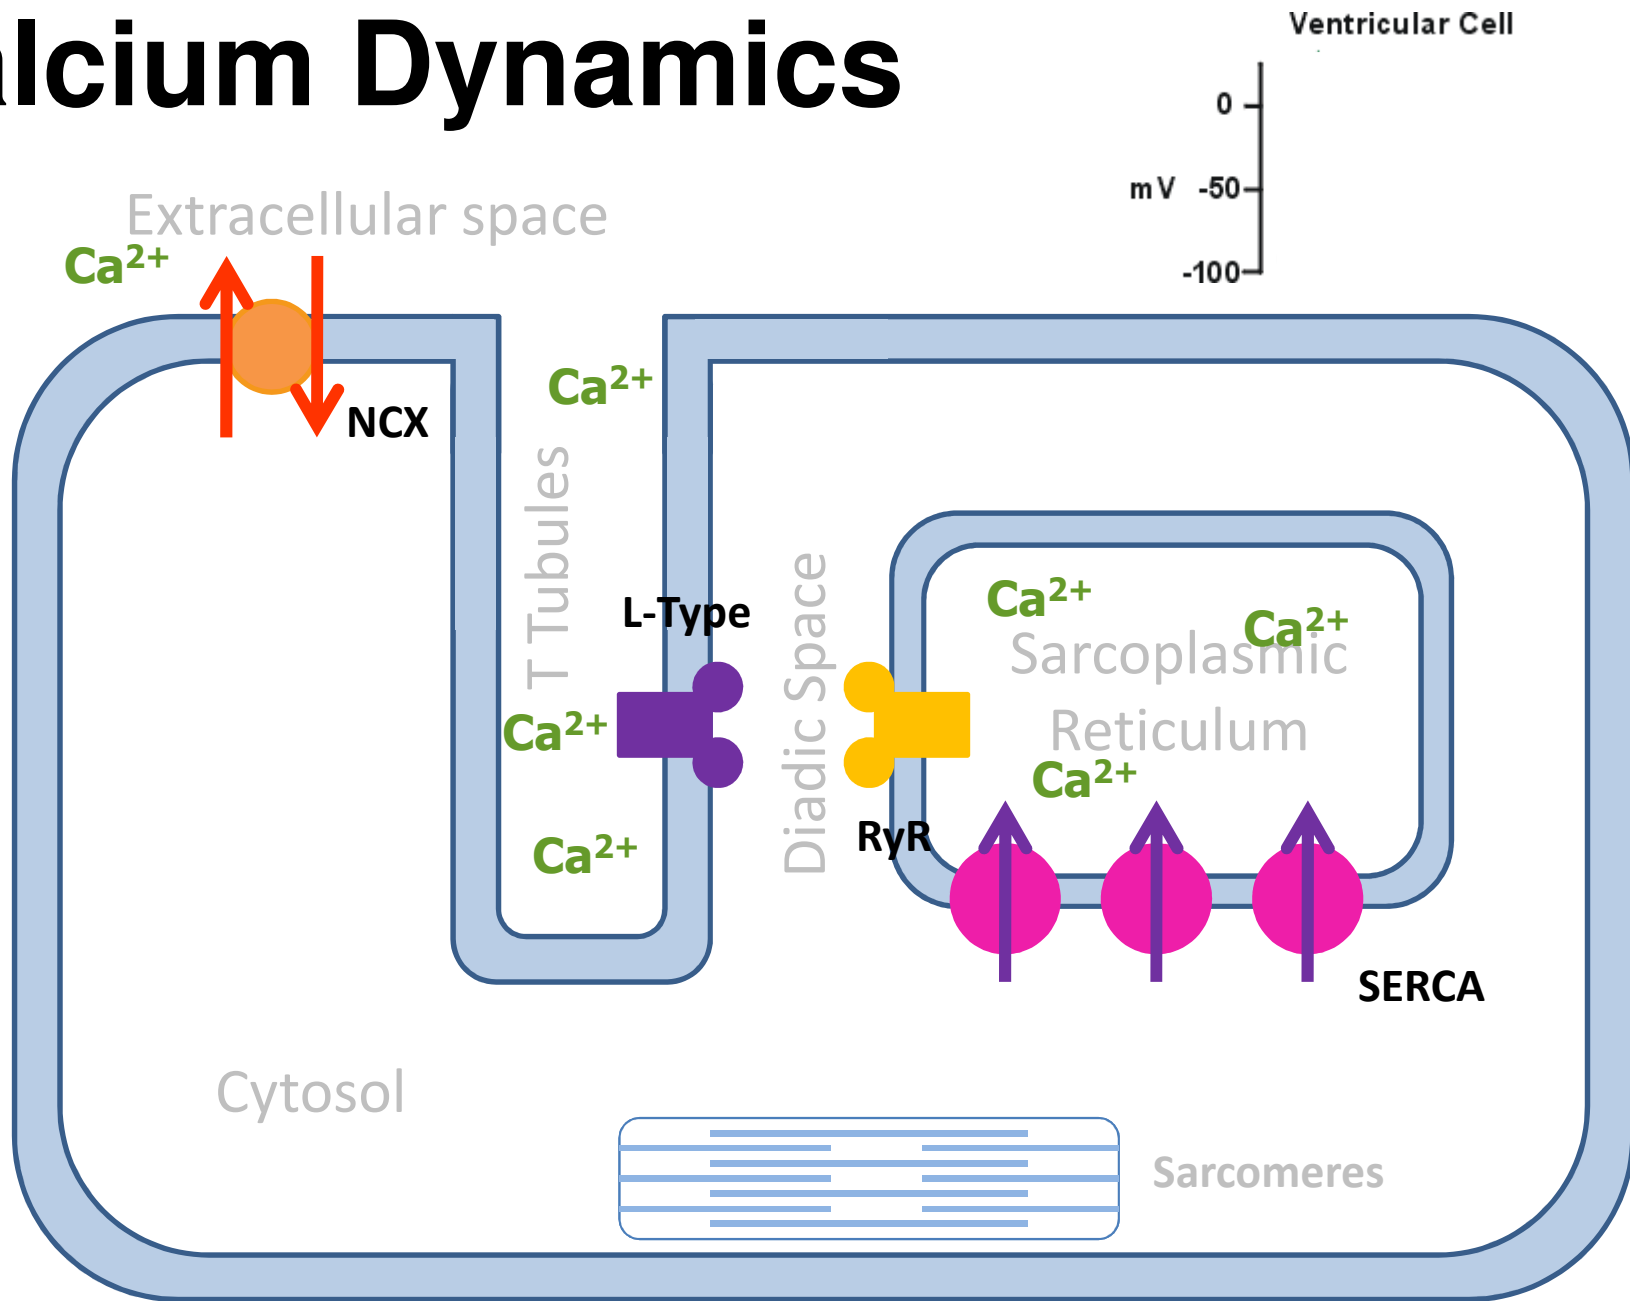



# Modelling **Data Driven**

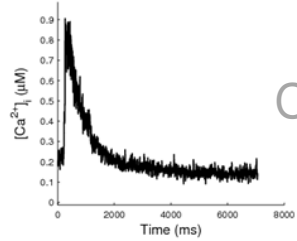

Ca Flux during Caffeine Ca transient

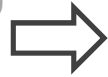

**Fit NCX Model**

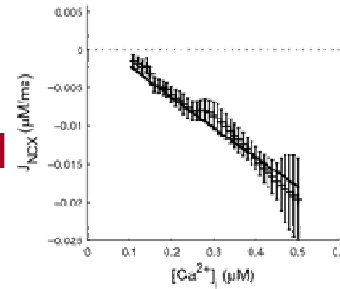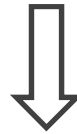

Ca Flux during tail of Field Stimulation Ca Transient. Less Ca Flux through NCX (calculated)

$I_{CaL}$  Voltage clamp traces

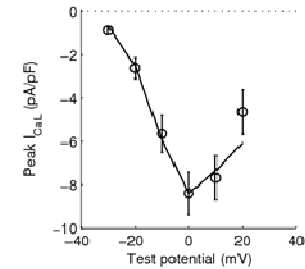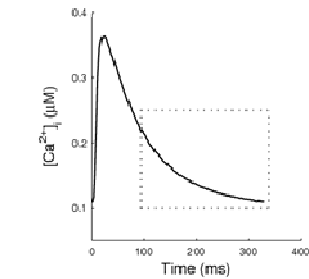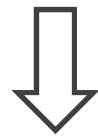

**Fit SERCA Model**

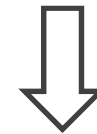

**Fit  $I_{CaL}$  Model**

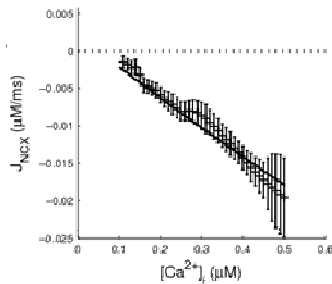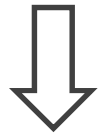

Ca flux during start of Field Stimulation Ca Transient. Less Ca Flux through NCX, SERCA and  $I_{CaL}$  (calculated)

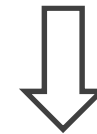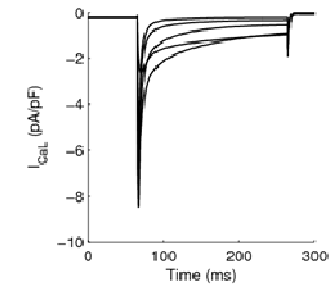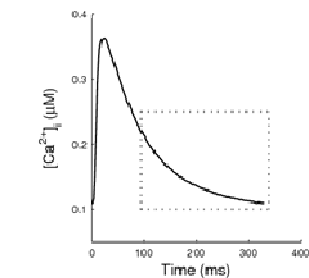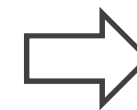

**Fit RyR Model**

# Modelling Data Driven

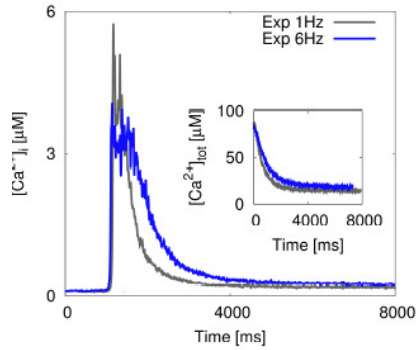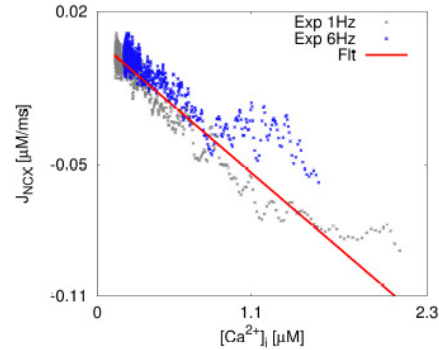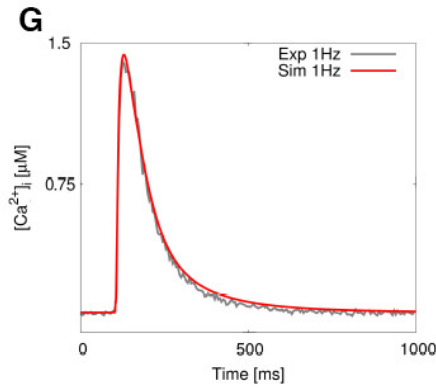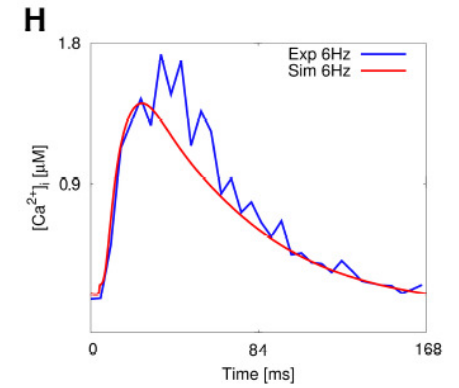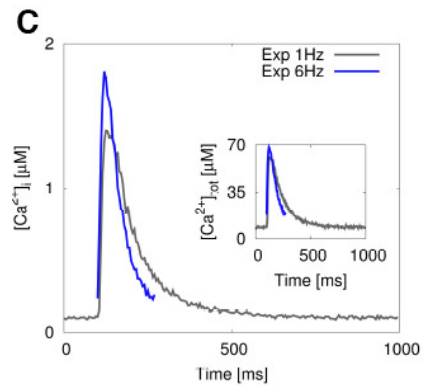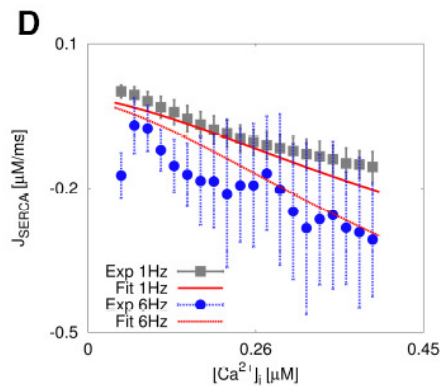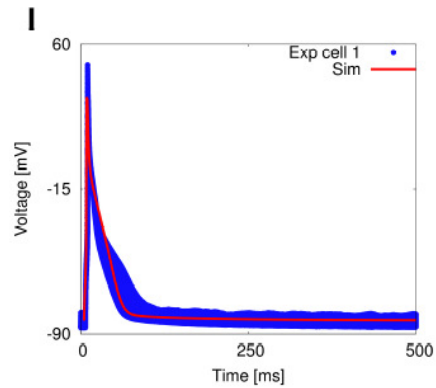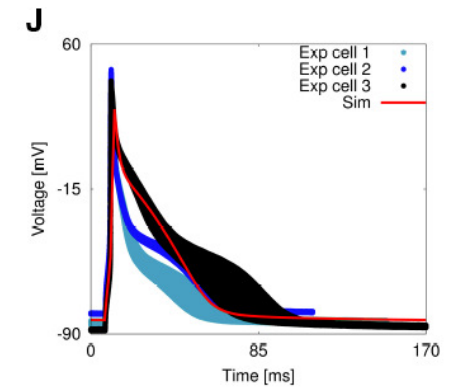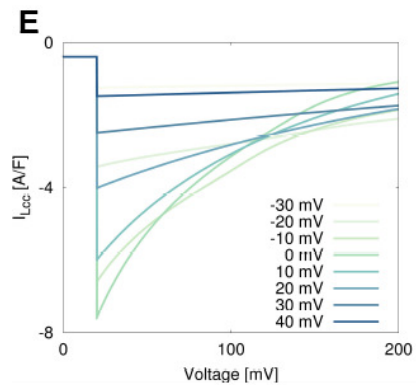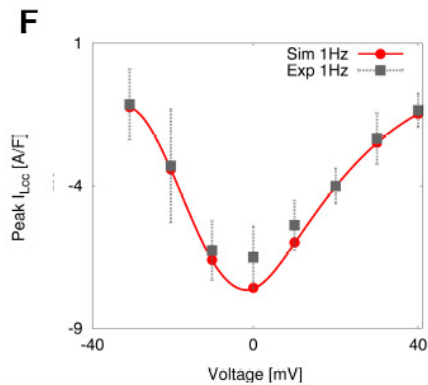

# Modelling **Data Driven**

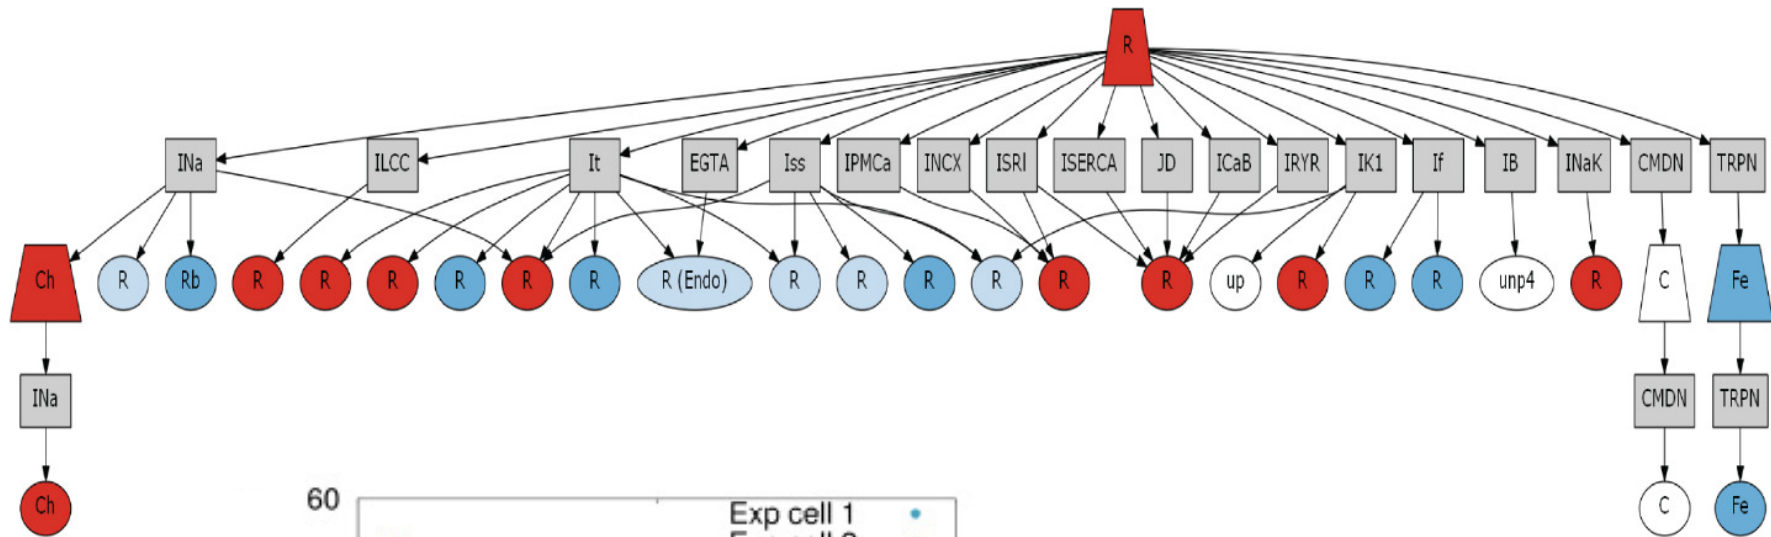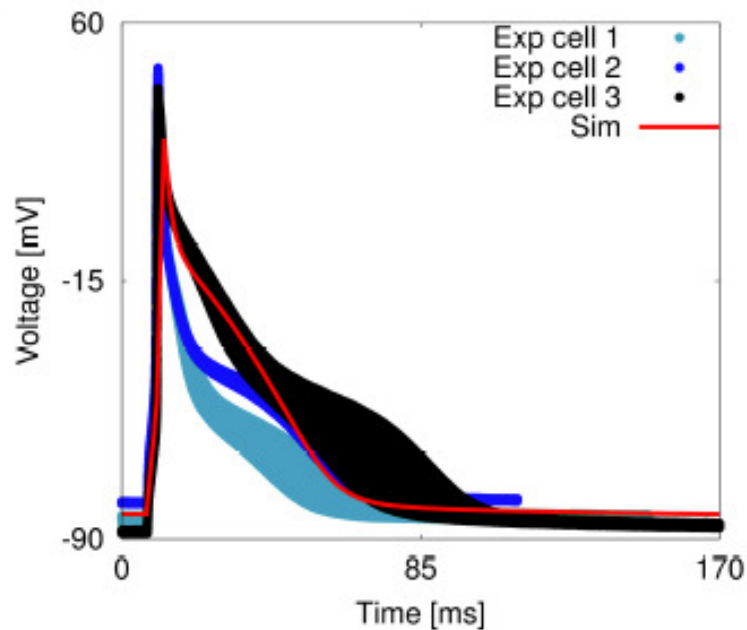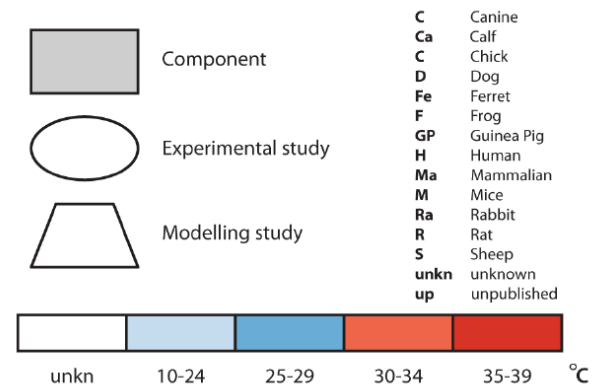

# High through put functional curation of models and components

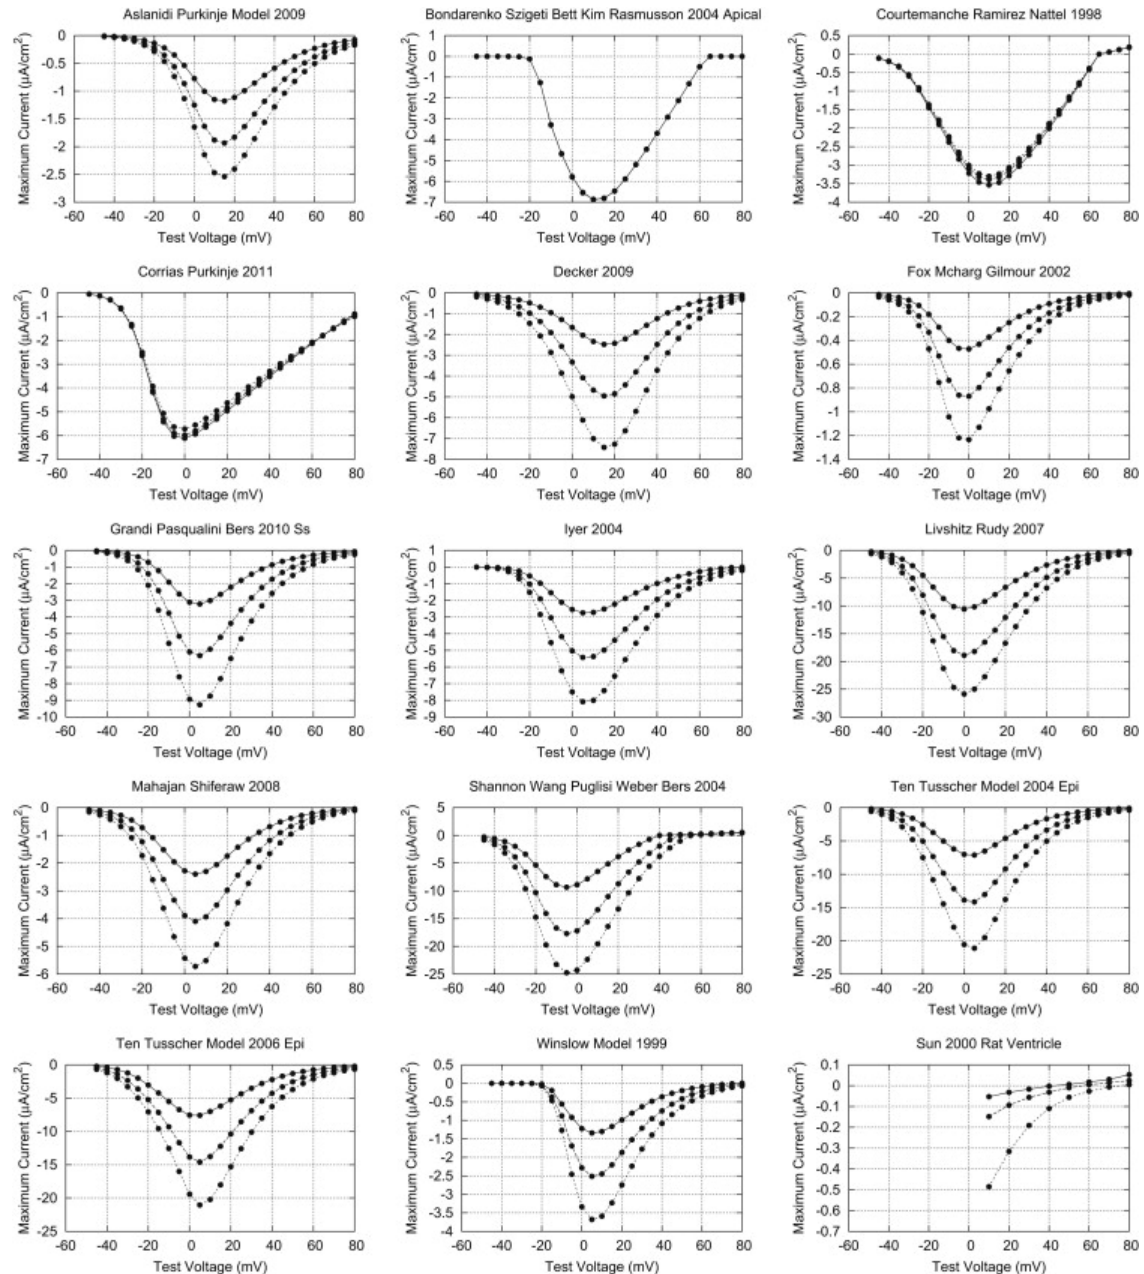

No ability yet to link to experimental data

Cooper J, Mirams GR & Niederer SA. (2011). High-throughput functional curation of cellular ep models. *Prog Biophys Mol Biol* **107**, 11-20.

# Defining simple agreed upon quality control tests

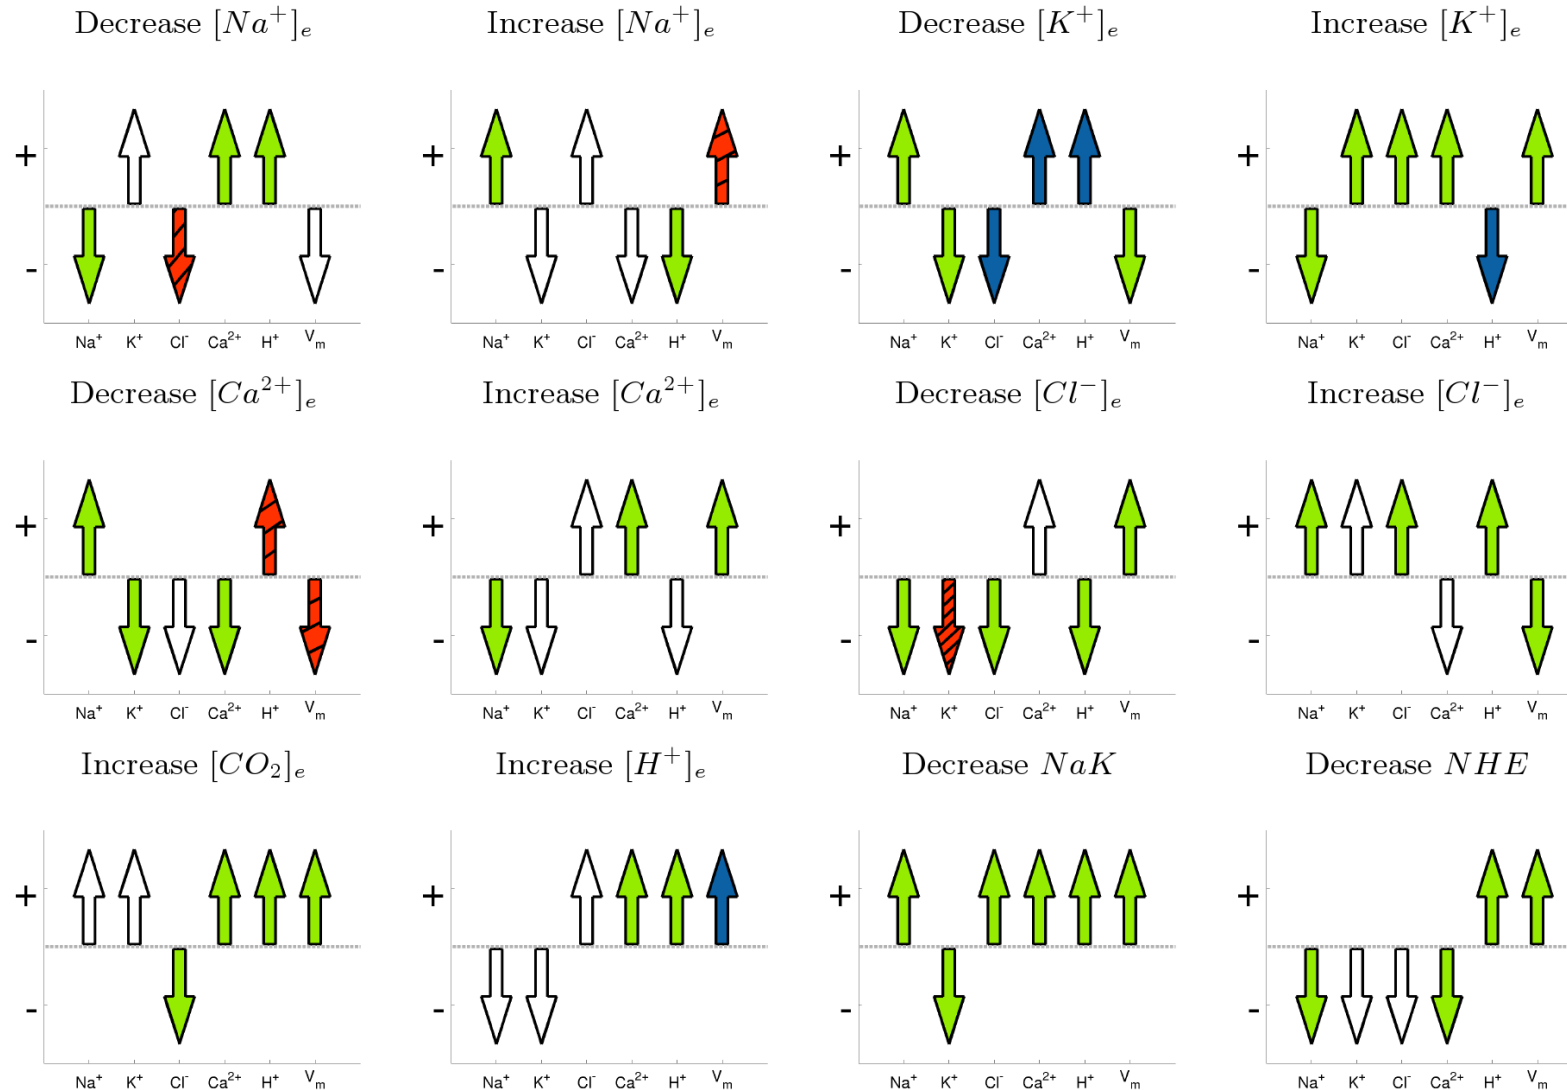

 Model matches experiments  
 No data

 No change observed experimentally  
 Model fails to match data

## Doxorubicin is an effective anticancer drug

- ✓ Potent and broad-spectrum
- ✓ Widely used in the treatment of leukemias and solid tumors
- ✓ Stops DNA replication and triggers apoptosis
  
- ✗ Severe Cardiotoxicity that leads to CHF
- ✗ Cumulative, dose-dependent and irreversible
- ✗ 50–60% contractile dysfunction with 430–600 mg/m<sup>2</sup> doses
- ✗ Symptoms can progress years or even decades after chemotherapy

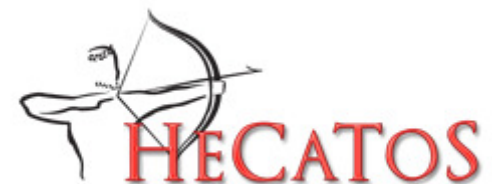

# The mechanism of DOX cardiotoxicity is controversial

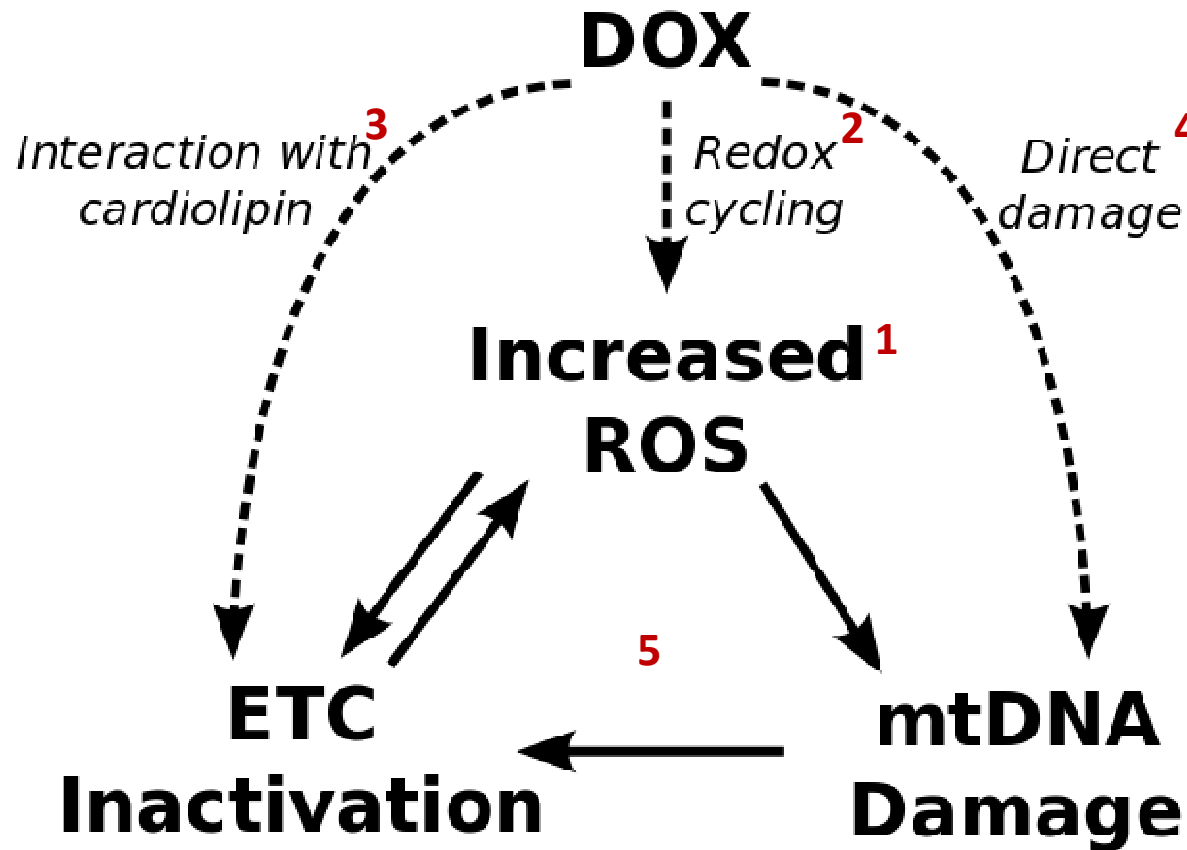

- 1) G. Minotti, P. Menna, E. Salvatorelli, G. Cairo, and L. Gianni. Anthracyclines: molecular advances and pharmacologic developments in antitumor activity and cardiotoxicity. *Pharmacological Reviews*, 56(2):185{229, Jun 2004.
- 2) Kelvin J. A. Davies and James H. Doroshov. Redox cycling of anthracyclines by cardiac mitochondria. anthracycline radical formation by nadh dehydrogenase. *The Journal of Biological Chemistry*, 261(7):3060{7, Mar 1986.
- 3) O. Marcillat, Y. Zhang, and K. J. Davies. Oxidative and non-oxidative mechanisms in the inactivation of cardiac mitochondrial electron transport chain components by doxorubicin. *Biochemical Journal*, 259(1):181{189, Apr 1989.
- 4) J. M. Berthiaume and K. B. Wallace. Persistent alterations to the gene expression profile of the heart subsequent to chronic doxorubicin treatment. *Cardiovascular Toxicology*, 7:178{191, 2007.
- 5) Dirk Lebrecht, Bernhard Setzer, Uwe-Peter Ketelsen, Jörg Haberstroh, and Ulrich A. Walker. Time-dependent and tissue-specific accumulation of mtDNA and respiratory chain defects in chronic doxorubicin cardiomyopathy. *Circulation*, 108(19):2423{9, Nov 2003.

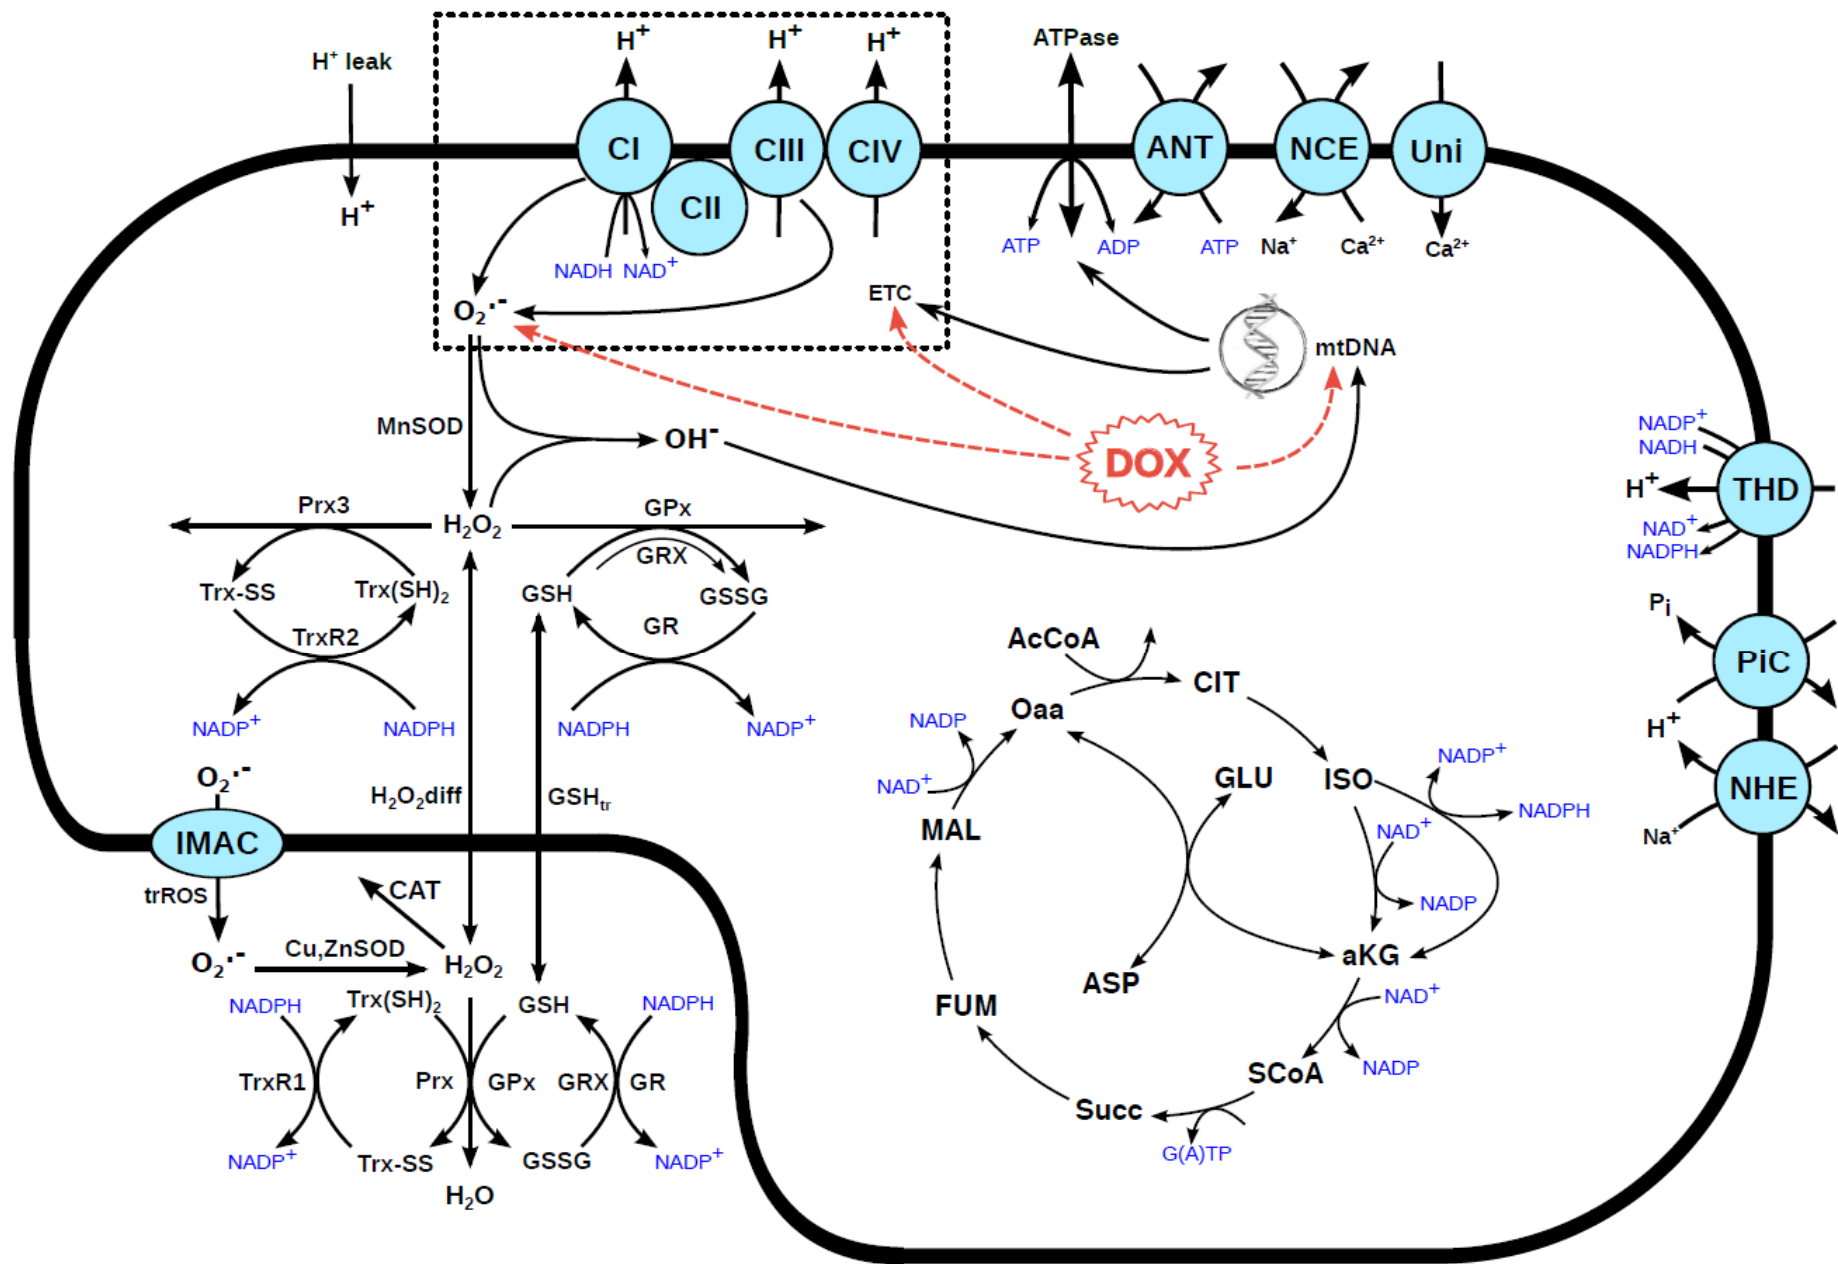



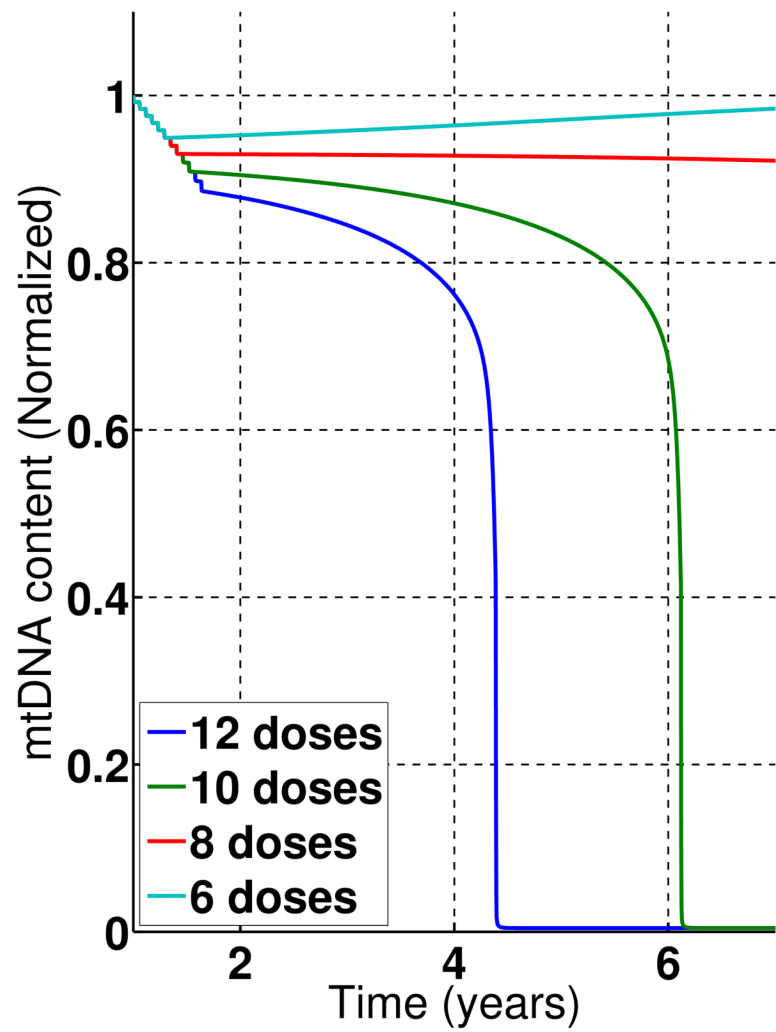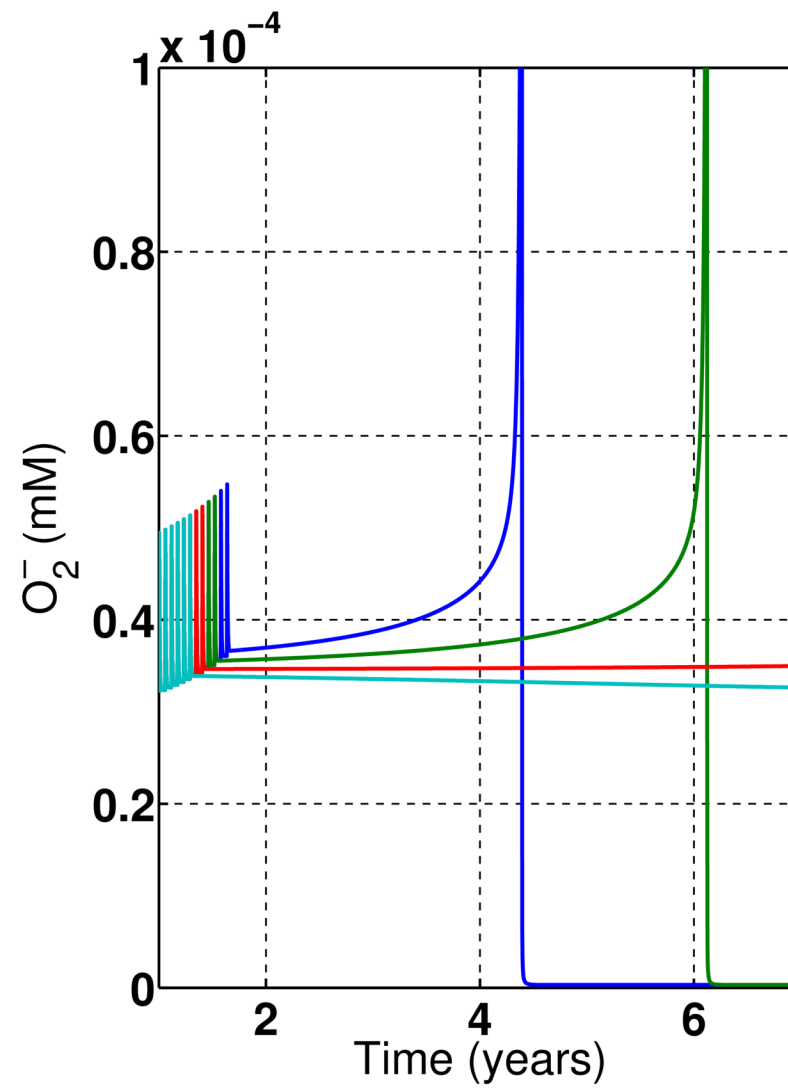

# Virtual Patient Toxicity

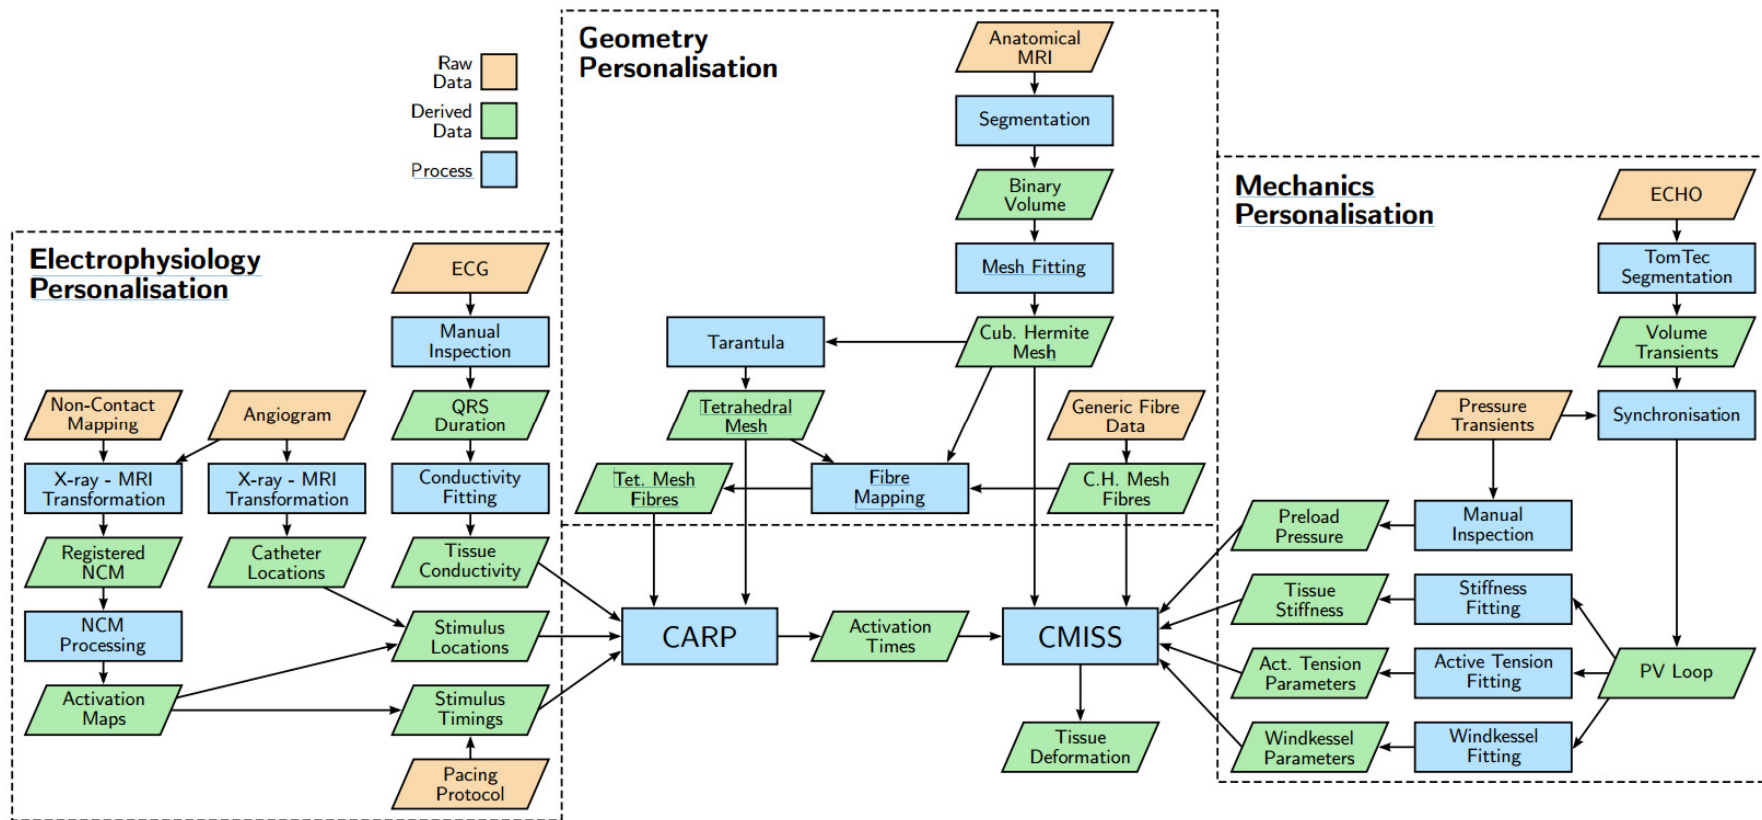

# Modelling **Anatomy**

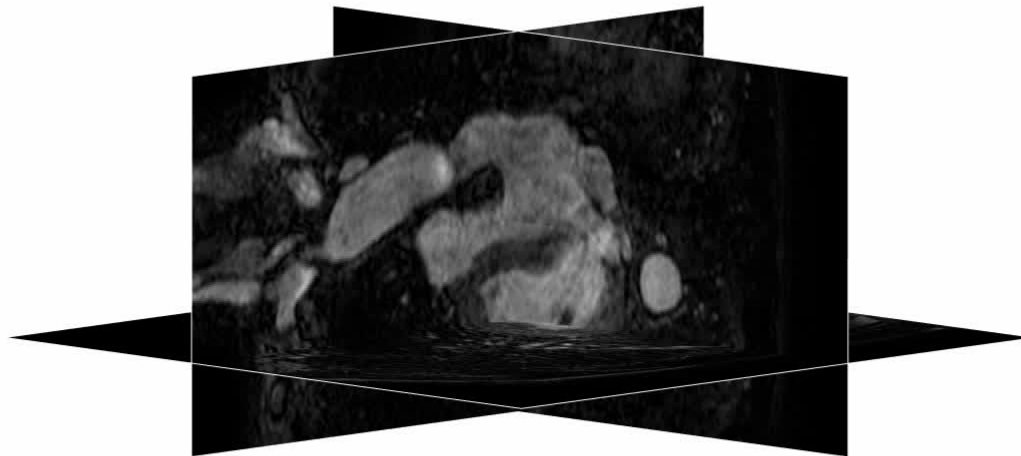

Lamata P, Niederer S, Barber D, Norsletten D, Lee J, Hose R, *et al.* *Personalization of Cubic Hermite Meshes for Efficient Biomechanical Simulations.* *Medical Image Computing and Computer-Assisted Intervention – MICCAI 2010: Springer Berlin / Heidelberg:380-387.*

# Personalised **Fibres**

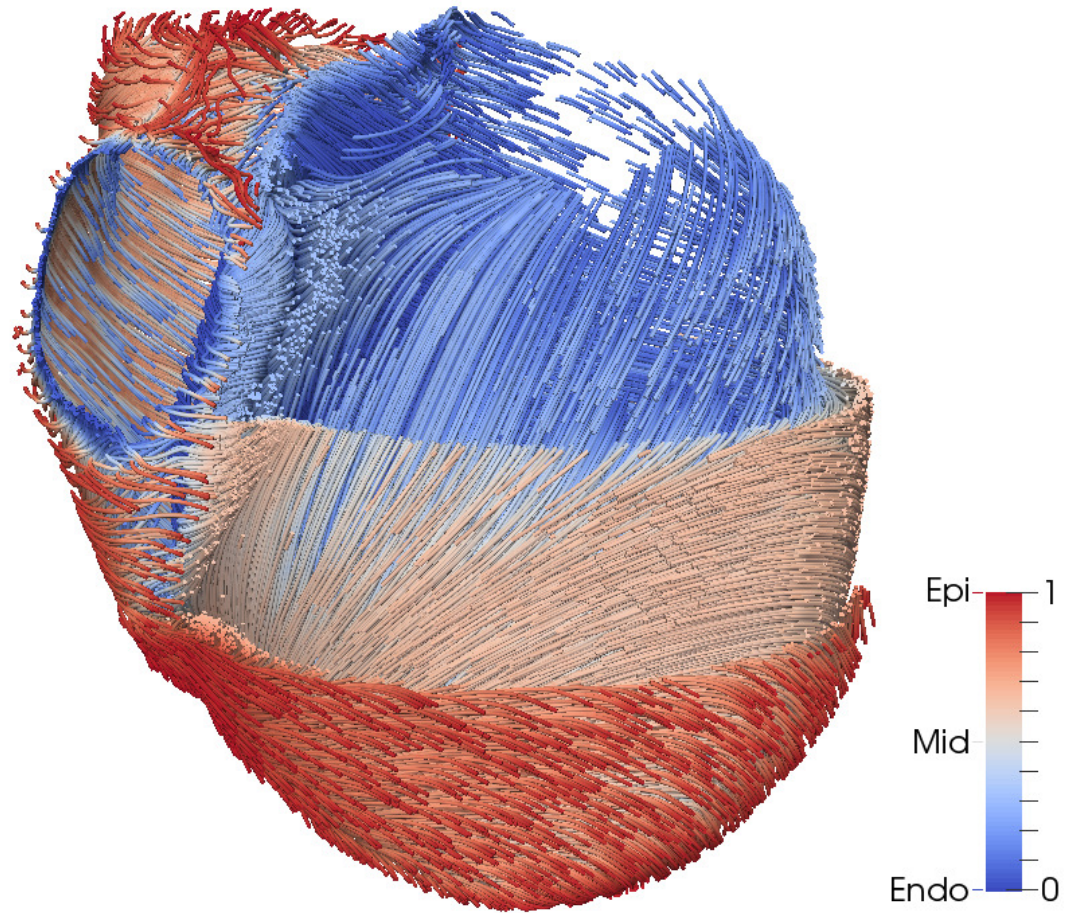

# Personalised **Mechanics**

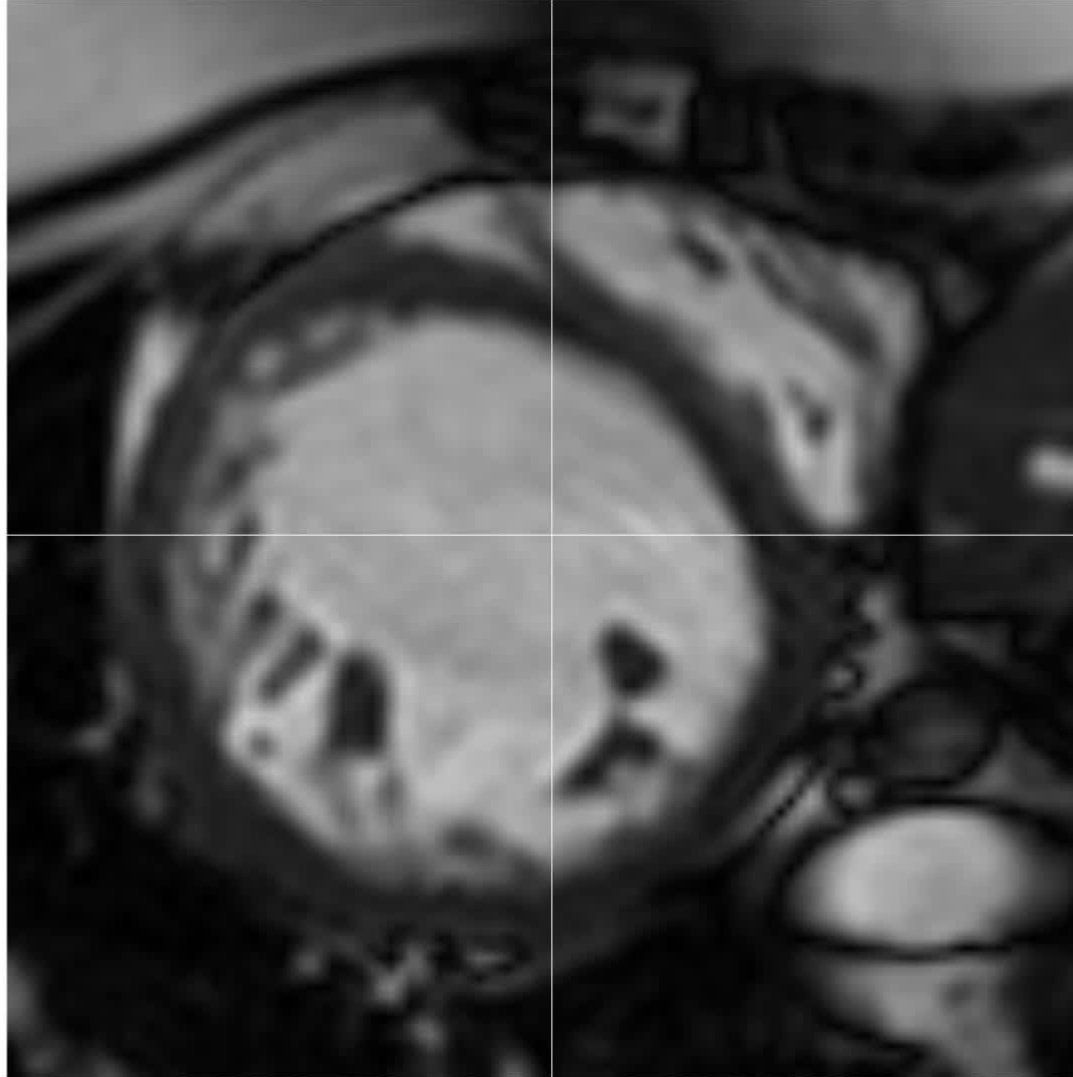

High resolution **Personalised Models**

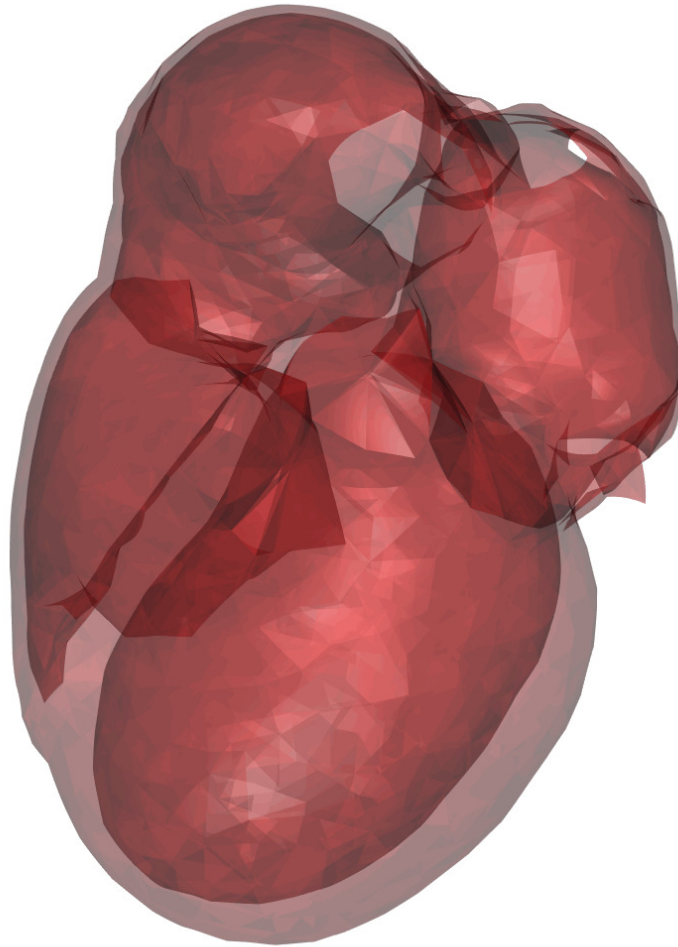

In collaboration with Sander Land

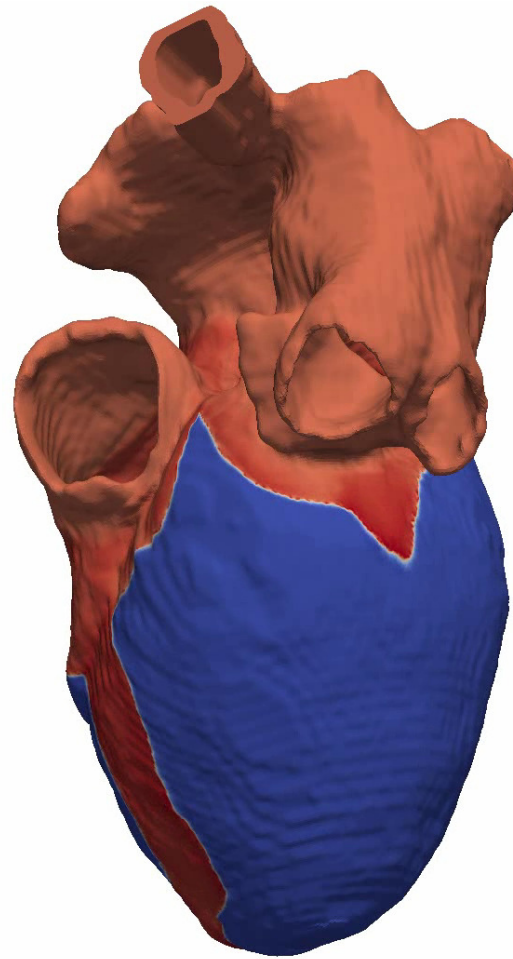

In collaboration with Gernot Plank

# Data Interpretation: Substrate mapping

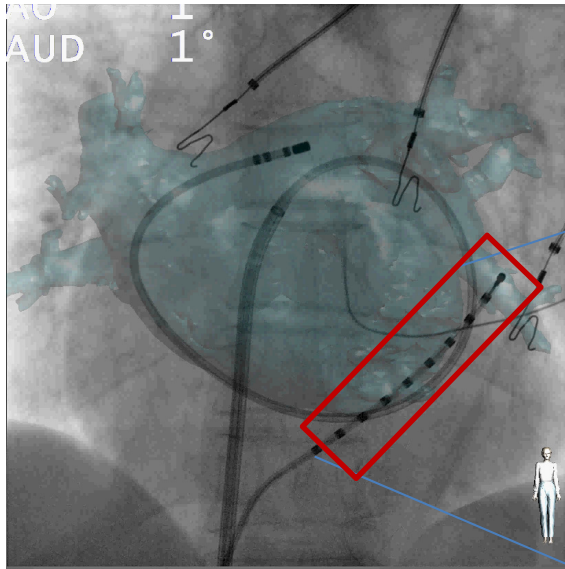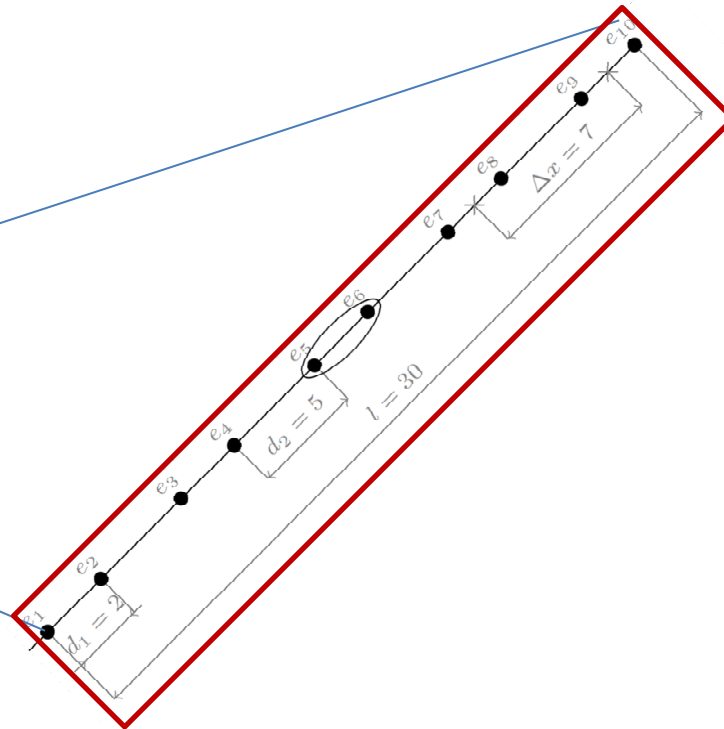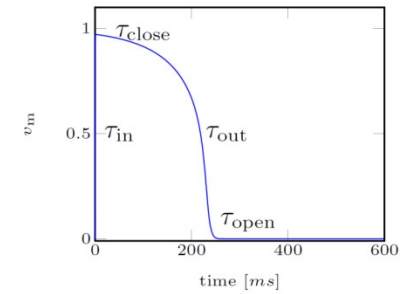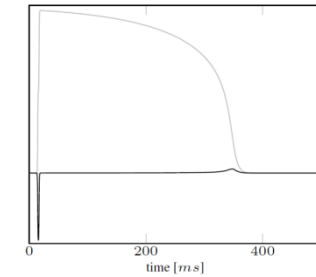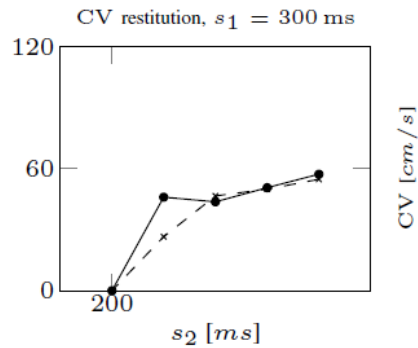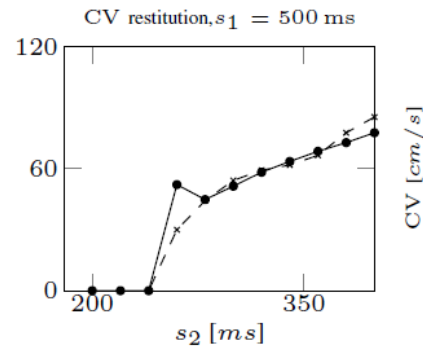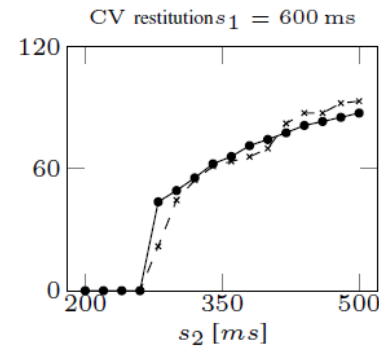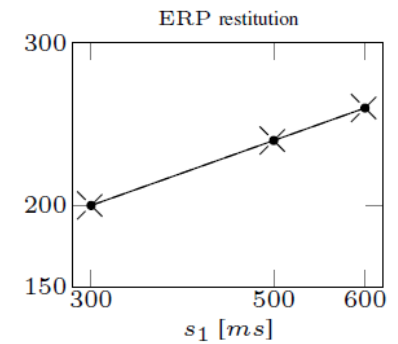

data: ( - x - )  
 fitted: ( ● - )

# Quantitative **Systems Pharmacology**

**Population variation**

**Interspecies variation**





# Practical Guide for Choosing granularity

How much effort goes into evaluating a novel experimental assay?

1. Choose if re-using existing models (assume yes)
2. Create list of candidate models that meet or exceed desired complexity/granularity
3. Define a set of functional tests
4. Acquire or define ground truth data
  - Consistent data sets will continue to be a challenge
4. Evaluate candidate models against tests
5. Select optimal candidate
6. Evaluate data dependencies
7. Improve model as required
  
8. Test interpretation assumptions:
  - e.g. Is a single cell action potential directly related to the QT interval?
