# Supplementary material for: Methodologies for Quantitative Systems Pharmacology (QSP) Models: Design and Estimation
Source: PubMed Central journal article supplement — CPT Pharmacometrics Syst Pharmacol. 2017 Jul 11;6(8):496–8. doi: 10.1002/psp4.12206 (PMC5572127; doi:10.1002/psp4.12206), 2017-07-11
Supplement: PSP4-6-496-s007.pdf [file PSP4-6-496-s007.pdf]

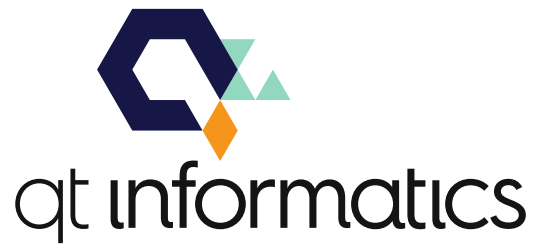

---

## **The application and evaluation of cardiac models for drug safety assessment, are we spoilt for choice?**

Mark Davies PhD

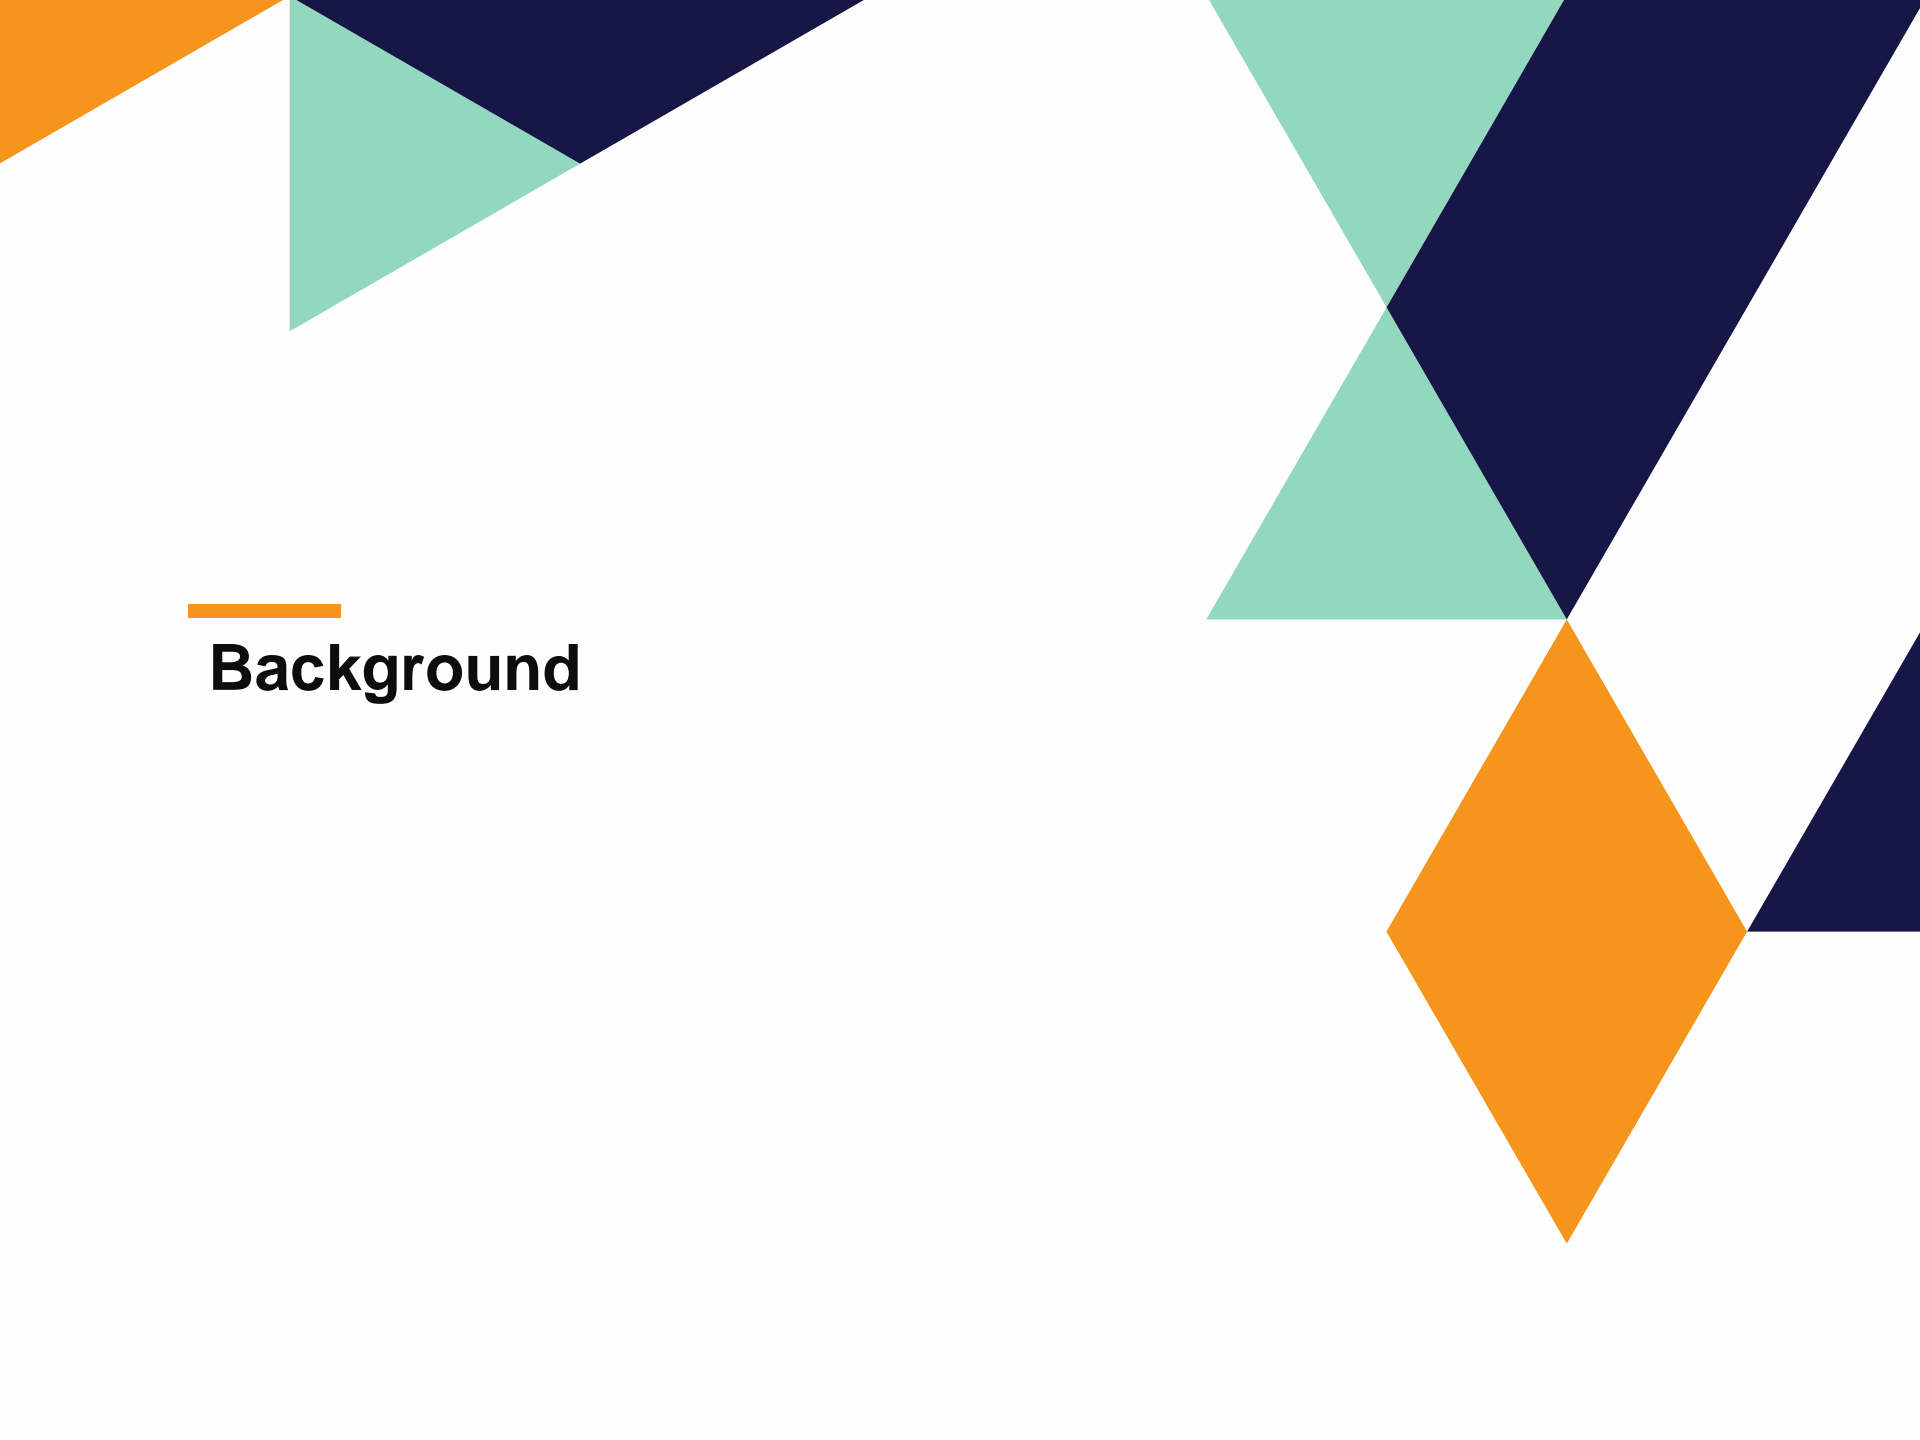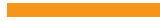

**Background**

# The ECG

- 1<sup>st</sup> action potential for each heart beat occurs in the Sino-Atrial node
- This initiates a wave of excitation that spreads through the heart and generates an electrical signal that can be detected at the body surface the electrocardiogram (ECG)

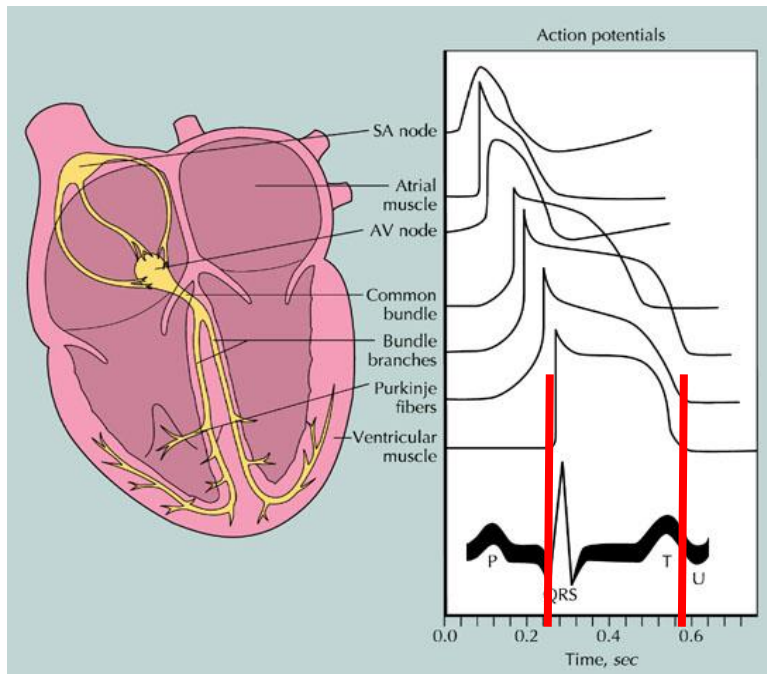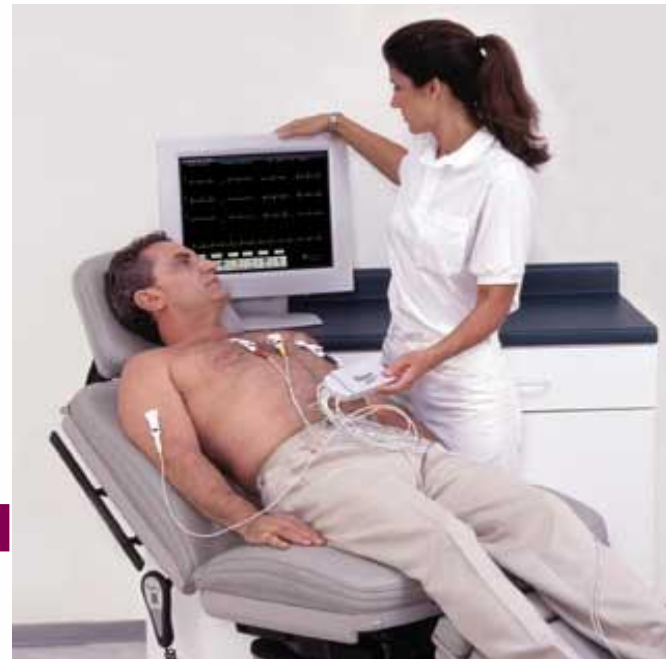

# What is the risk of drug-induced effects on the ECG?

- ❖ Substantial number of drugs withdrawn from sale owing to QT interval prolongation & Torsades de Pointes (twisting of the points - QRS)

 An ECG is a recording of the electrical activity that initiates each heartbeat.

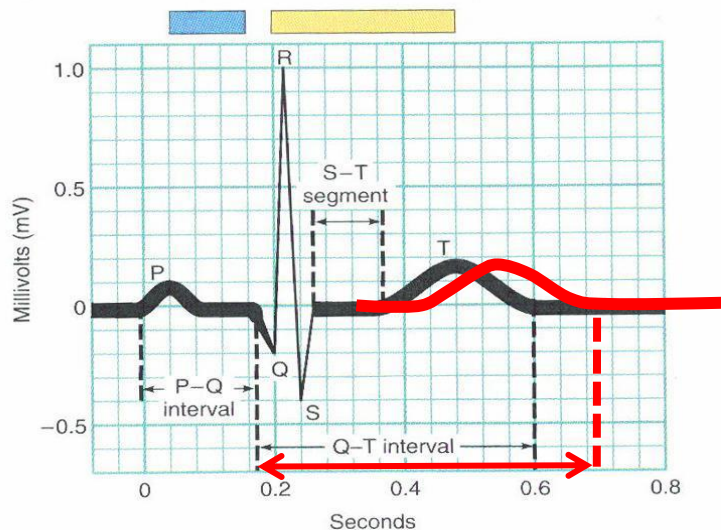

Drug-induced QT prolongation, in a very small % of people, leads to a potentially fatal arrhythmia: Torsades de Pointes

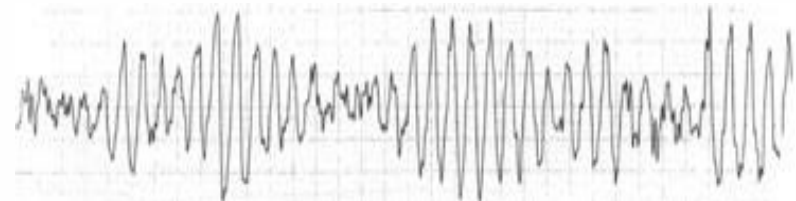

# Development of cardiac risk strategy

- Genetic evidence – LQT disorders (e.g. Curran et al. 1995)
- Pharmacological evidence for withdrawn drugs i.e. linkage with hERG activity, e.g.
  - Terfenadine – Rampe et al 1993
  - Cisapride – Rampe et al 1997
  - ...
- Regulatory guidance and requirements, e.g.

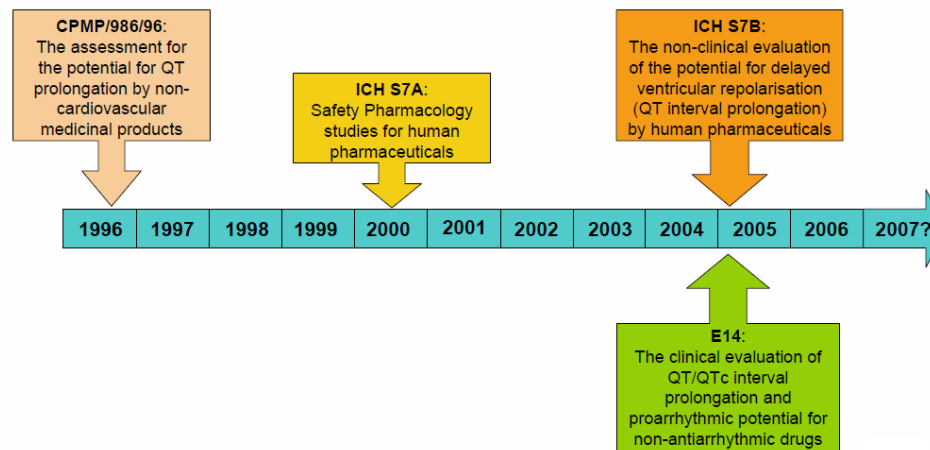

CiPA  
2015?

# There's something else going on

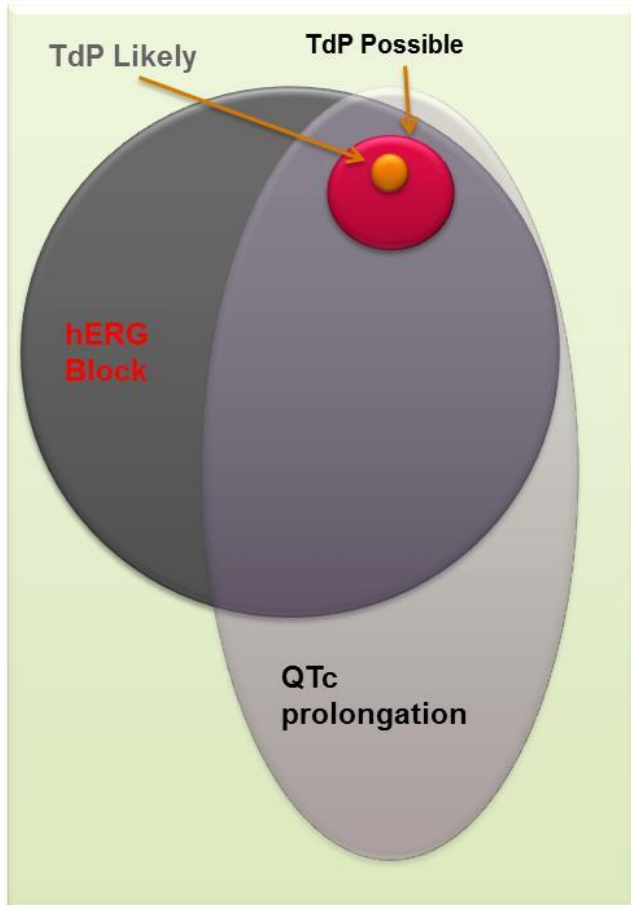

- ❖ The paradigm that “hERG → QT prolongation → TdP” is no longer acceptable
- ❖ Increased understanding of cardiomyocyte electrophysiology has supported improved models of possible causation
- ❖ This has led to increased number of ion channel profiling in discovery projects (typically to include hERG, Nav1.5, Cav1.2)
- ❖ In-silico approaches to offer an interpretation of the multi-ion channel data

*Valentin JP (from presentation at Computational Cardiovascular Science Workshop, Oxford, Sept 2014)*

# Membrane currents that generate a normal action potential

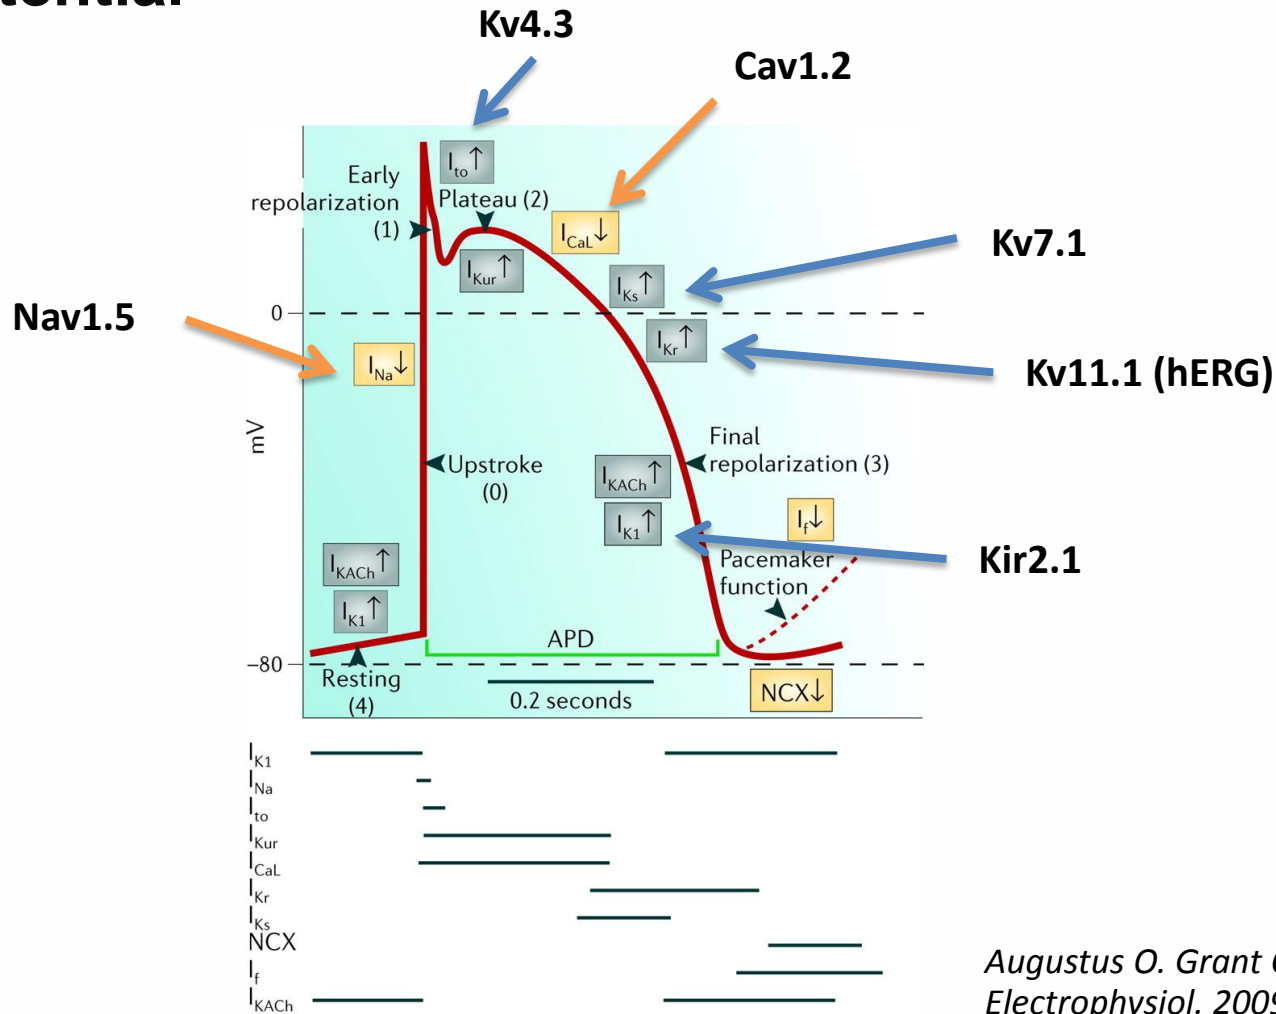

Augustus O. Grant *Circ Arrhythm Electrophysiol.* 2009;2:185-194

# Limitations of “molecularising” the ventricular Action Potential

- ❖ Although able to generate inhibition curves for compound X against all the key channels in isolation, testing in an integrated system is needed

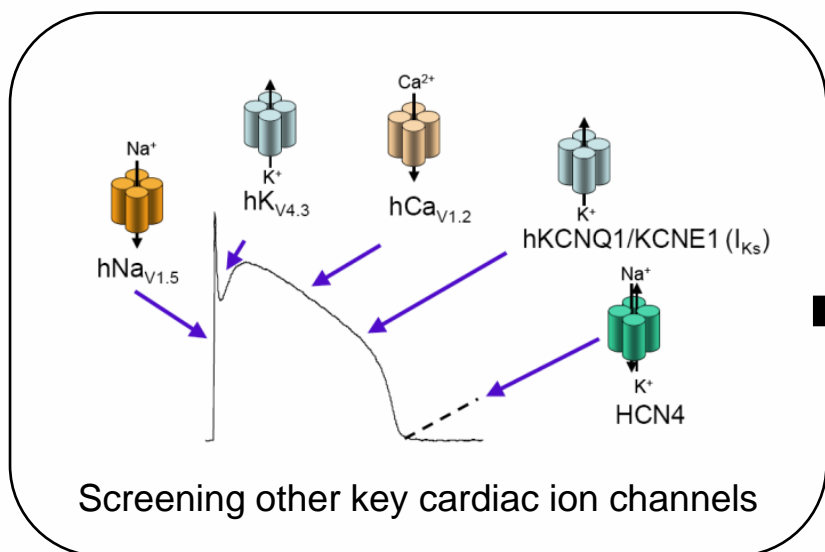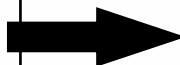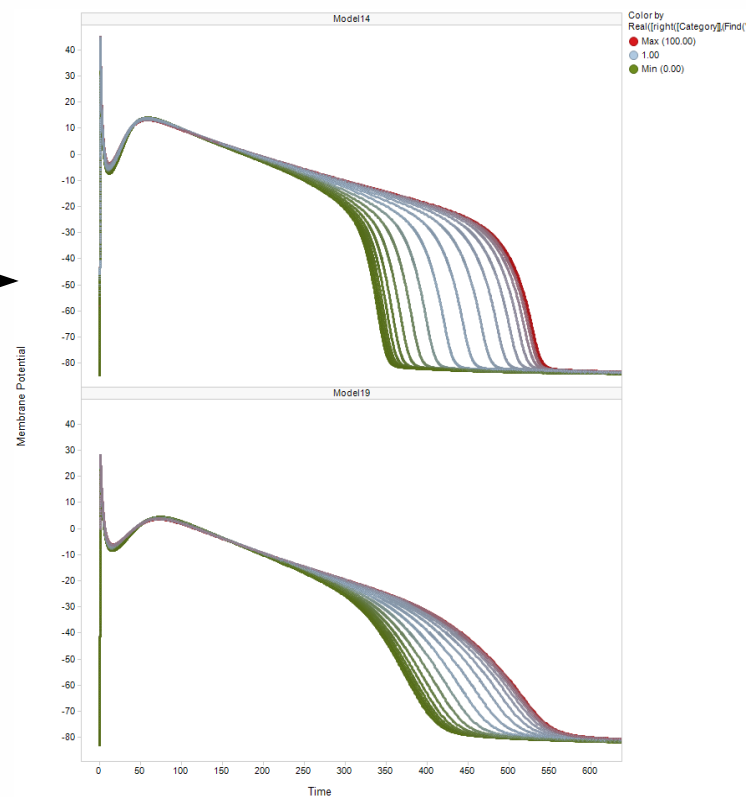

Virtual simulations provide an interpretation and a prediction of the integrated system from isolated ion channel screens



# Where does M+S fit in decision making?

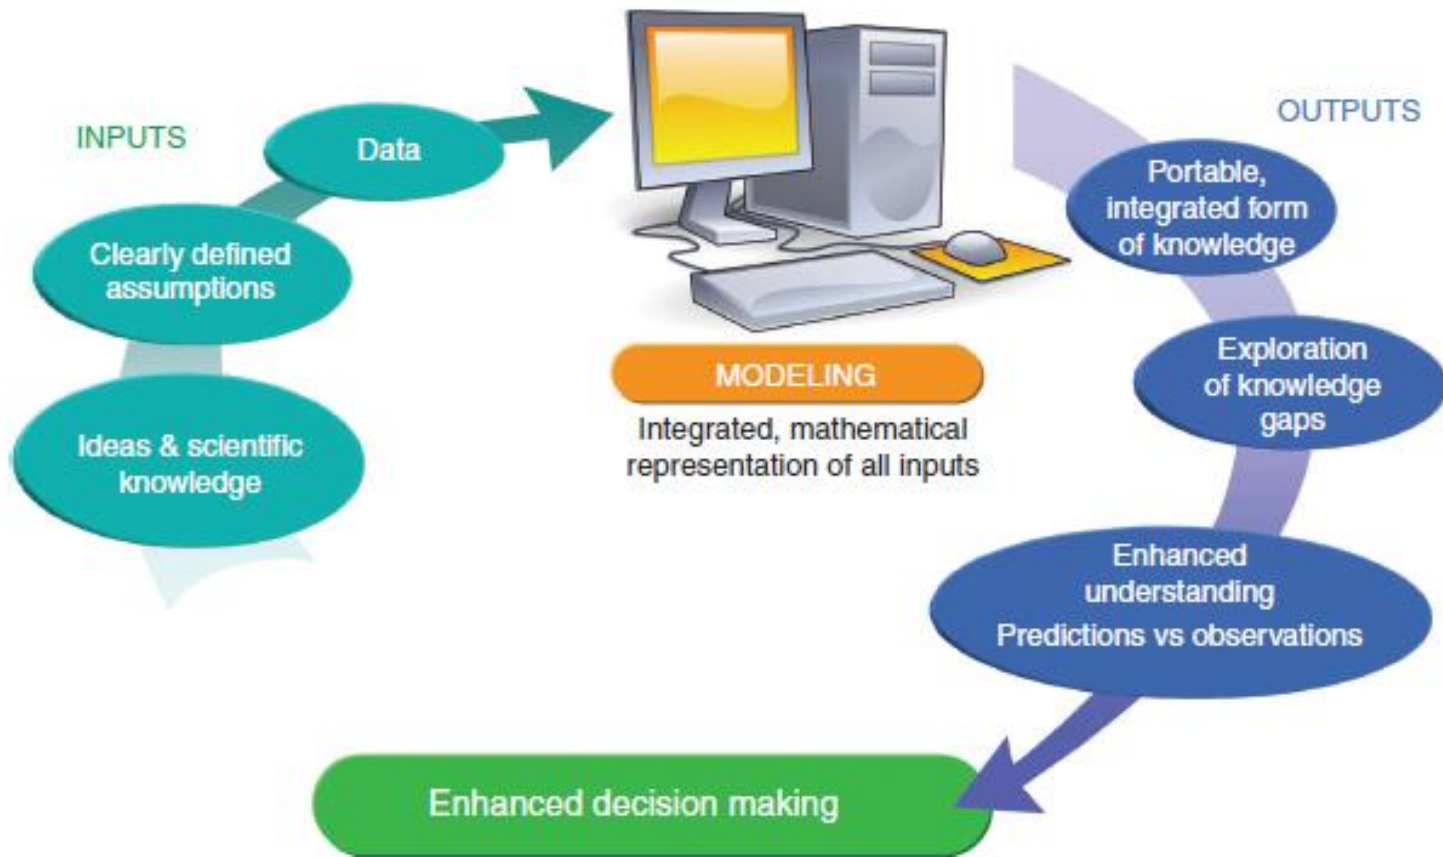

Visser et al (2014) *CPT Pharmacometrics Syst. Pharmacol*

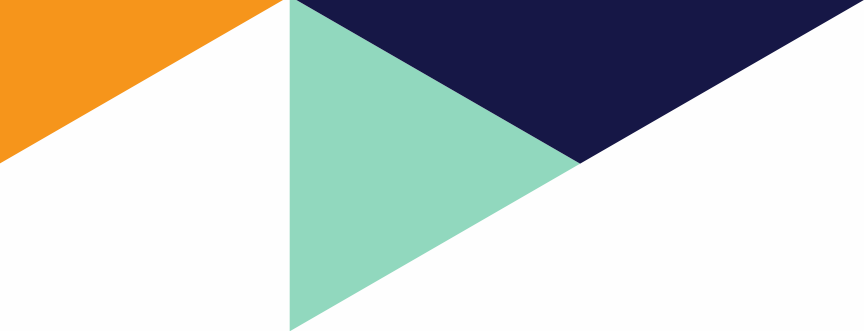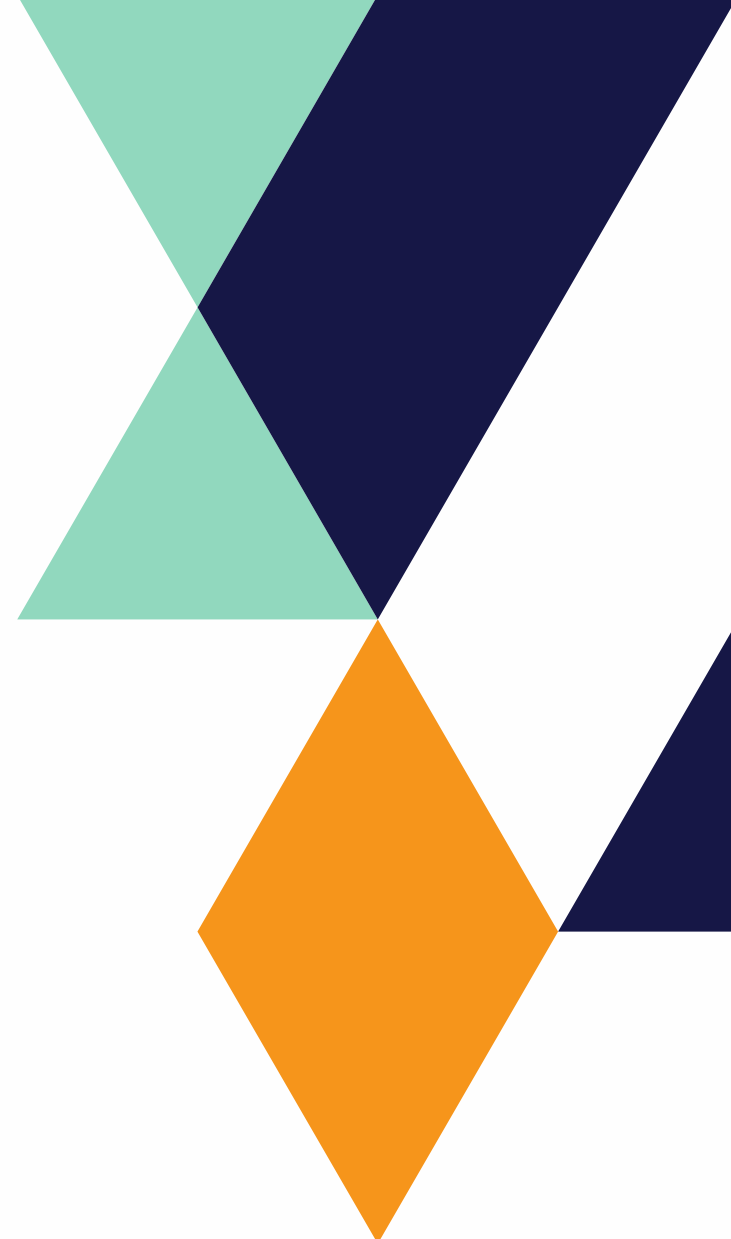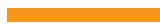

# Modelling approaches

# Rationale and background

- ❖ Unlike some empirical models, mechanistic models are able to integrate individual ion channel effects measured using automated patch clamp systems (APC)
- ❖ The end of the action potential from left ventricular myocytes correlates with the end of the QT-interval on the ECG
- ❖ Therefore action potential simulations are a useful surrogate for ECG effects
- ❖ However, recent initiatives e.g. CiPA present a greater opportunity of usage of in-silico models
- ❖ Furthermore these models provide an excellent means for developing novel biomarkers for predicting beyond QT e.g. TdP/proarrhythmia risk

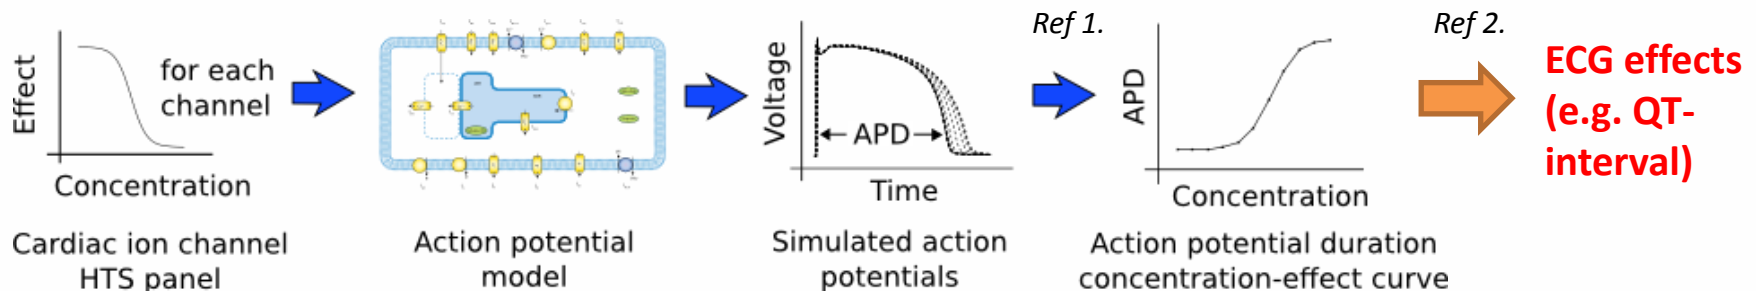

No. compounds screened experimentally: **1000's**

**100's**

**10's**

Ref.1 Davies et al. 2012 AJP-HCP  
Ref.2 Mirams et al. 2014 JPTM

# Which model to use?

## Cell Type (Different Shape)

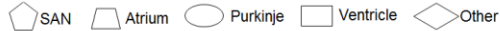

## Species (Colour Coded)

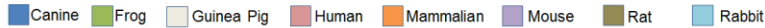

## Model 'Evolution' Tree

### Noble Family and tenTusscher Family

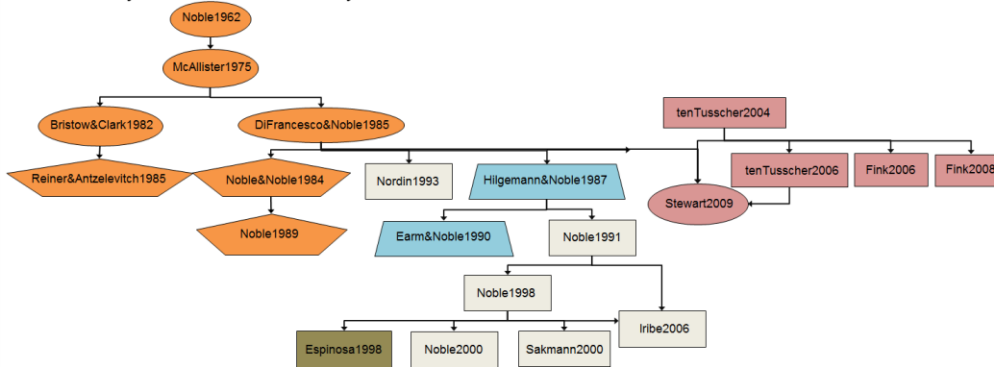

### Luo&Rudy Family

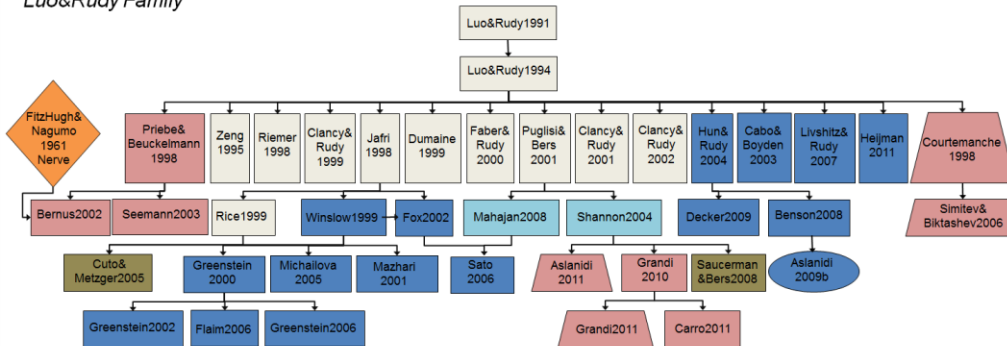

Davies et al (2016)  
*Drug Discovery Today (in press)*  
 &  
 Niederer et al (2009) *Exp. Physiol.*

## Electrophysiology

**Adrian, Peachey, 1973**

Reconstruction of the action potential of frog sartorius muscle

**Albrecht, Colegrove, Friel, 2002**

Differential Regulation of ER Ca<sup>2+</sup> Uptake and Release Rates Accounts for Multiple Modes of Ca<sup>2+</sup>-induced Ca<sup>2+</sup> Release

**Albrecht, Colegrove, Hongpaisan, Pivovarova, Andrews, Friel, 2001**

Multiple Modes of Calcium-induced Calcium Release in Sympathetic Neurons I: Attenuation of Endoplasmic Reticulum Ca<sup>2+</sup> Accumulation at Low [Ca<sup>2+</sup>]<sub>i</sub> during Weak Depolarisation

**Aslanidi, Boyett, Dobrzynski, Li, Zhang, 2009**

Mechanisms of transition from normal to reentrant electrical activity in a model of rabbit atrial tissue: interaction of tissue heterogeneity and anisotropy

**Aslanidi, Stewart, Boyett, Zhang, 2009**

Optimal velocity and safety of discontinuous conduction through the heterogeneous Purkinje-ventricular junction

**Beeler, Reuter, 1977**

Reconstruction of the action potential of ventricular myocardial fibres, with modifications to demonstrate uncertainty.

**Beeler, Reuter, 1977**

Reconstruction of the action potential of ventricular myocardial fibres

**Beeler, Reuter, 1977**

Reconstruction of the action potential of ventricular myocardial fibres

**Benson, Aslanidi, Zhang, Holden, 2008**

The canine virtual ventricular wall: a platform for dissecting pharmacological effects on propagation and arrhythmogenesis (Epicardial Cell Model)

**Benson, Aslanidi, Zhang, Holden, 2008**

The canine virtual ventricular wall: a platform for dissecting pharmacological effects on propagation and arrhythmogenesis (Endocardial Cell Model)

**Benson, Aslanidi, Zhang, Holden, 2008**

The canine virtual ventricular wall: a platform for dissecting pharmacological effects on propagation and arrhythmogenesis (Midmyocardial Cell Model)

**Bernus, Wilders, Zemlin, Verschelde, Panfilov, 2002**

A computationally efficient electrophysiological model of human ventricular cells

**Bertram, Arnot, Zamponi, 2002**

Role for G protein G-beta-gamma isoform specificity in synaptic signal processing (Pre-Synaptic Cell)

**Bertram, Arnot, Zamponi, 2002**

Role for G protein G-beta-gamma isoform specificity in synaptic signal processing (Post-Synaptic Cell)

**Bertram, Pedersen, Luciani, Sherman, 2006**

A simplified model for mitochondrial ATP production

**Bertram, Previte, Sherman, Kinard, Satin, 2000**

The Phantom Burster Model for Pancreatic Beta Cells (fast bursting model)

**Bertram, Previte, Sherman, Kinard, Satin, 2000**

The Phantom Burster Model for Pancreatic Beta Cells (medium bursting model)

**Bertram, Previte, Sherman, Kinard, Satin, 2000**

The Phantom Burster Model for Pancreatic Beta Cells (slow bursting model)

**Bertram, Rhoads, Cimbor, 2008**

A phantom bursting mechanism for episodic bursting: original model

**Bertram, Rhoads, Cimbor, 2008**

A phantom bursting mechanism for episodic bursting: modified to include channel noise in the leak current

**Bertram, Sherman, 2004**

A Calcium-based Phantom Bursting Model for Pancreatic Islets

**Bertram, Smolen, Sherman, Mears, Atwater, Martin, Soria, 1995**

A role for calcium release-activated current (CRAC) in cholinergic modulation of electrical activity in pancreatic beta-cells

**Bondarenko, Szigeti, Bett, Kim, Rasmusson, 2004**

Computer model of action potential of mouse ventricular myocytes (Apical Cell Description)

**270 models in the  
electrophysiology  
page**

# Is model granularity a function of processor speed?

- ❖ Cardiac model development has a rich history since the early 'Noble' models
- ❖ In general, models have increased in their computational complexity in line with computational power
- ❖ Does the improved complexity improve predictive score?
- ❖ **What is missing is the assessment of predictive capacity?**

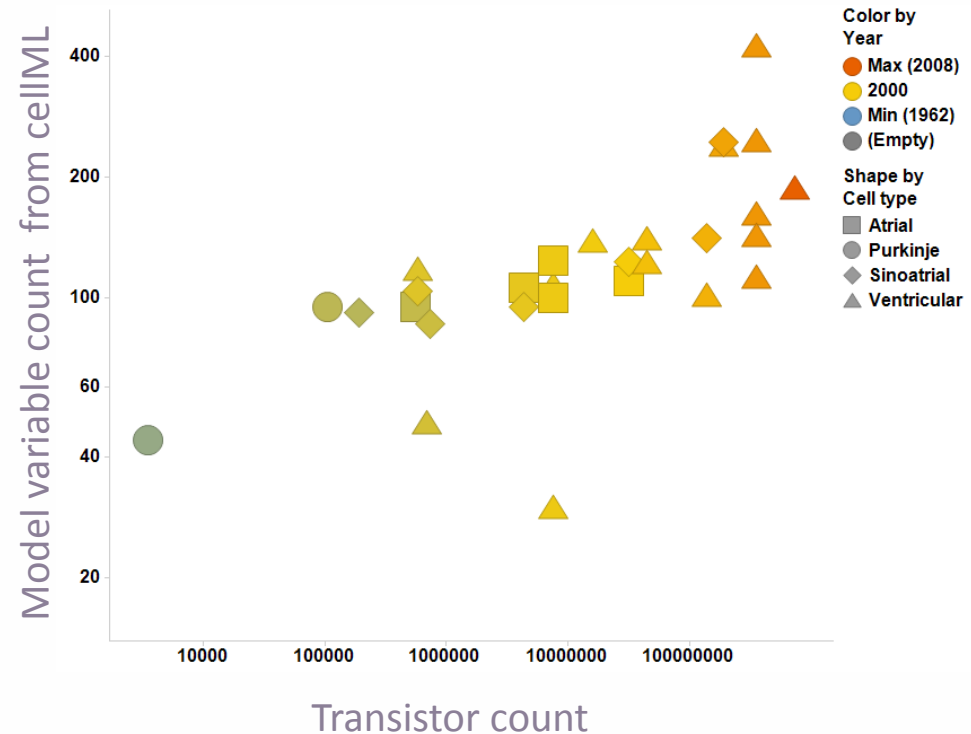

Figure 2: Generally, the size and complexity and mathematical models has increased over time in correlation with the availability of computational power.



# Previous in silico approaches

❖ Several literature studies have implemented in silico approaches for categorising risk score, using statistical methods, mechanism based models and ensemble approaches:

1. Kramer et al. (2013) integrating in a **statistical** model the data they obtained from APC platforms for compounds divided between TdP and non-TdP drugs
2. Mirams et al. (2014) combined ion channel screening data sets from multiple labs into different **mechanistic** models to evaluate the prediction of the outcome of the TQT study
3. Davies et al. (2012) used an **ensemble** of a mechanistic model to integrate multichannel data to predict action potential changes from a canine cardiomyocyte assay

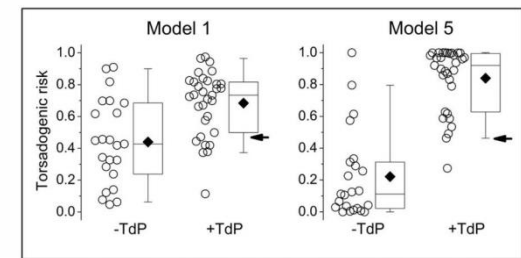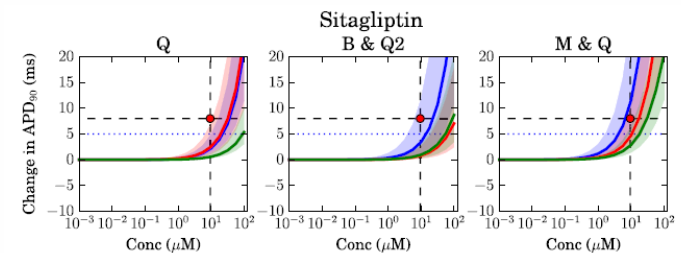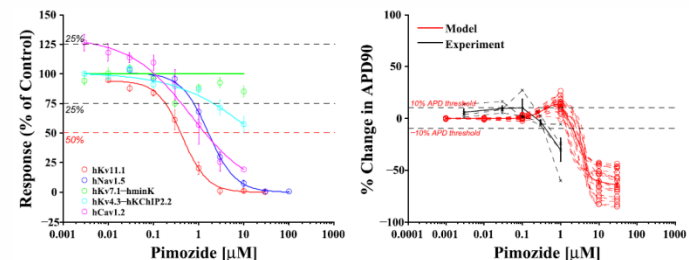



# Case study 1 - Sitagliptin

- ❖ Model predicts **prolongation**
- ❖ Clinical study shows **prolongation**
- ❖ **Consistent** prediction across datasets and model structures

Right prediction, right dose

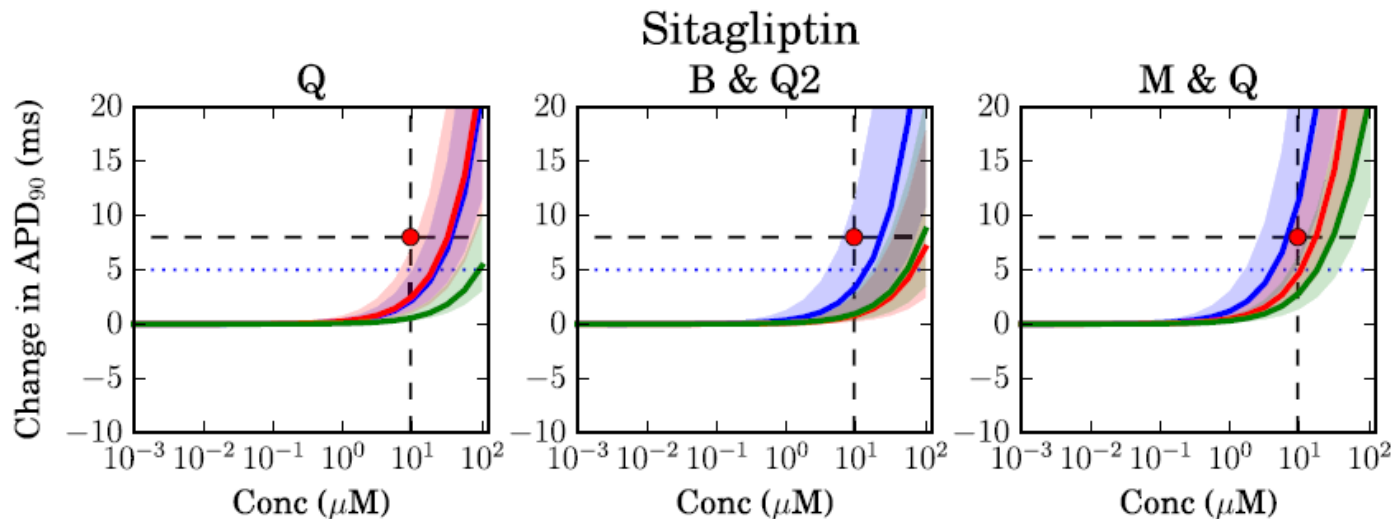

*Mirams et al (2014) JPTM*

## Case study 2 - Raltegravir

- ❖ Models predict **prolongation**
- ❖ Clinical study shows **no effect**
- ❖ Does the model suggest that an effect would be seen at higher clinical concentrations? Or **False positive**
- ❖ **Consistent** prediction across datasets and model structures

**Wrong prediction? wrong dose?**

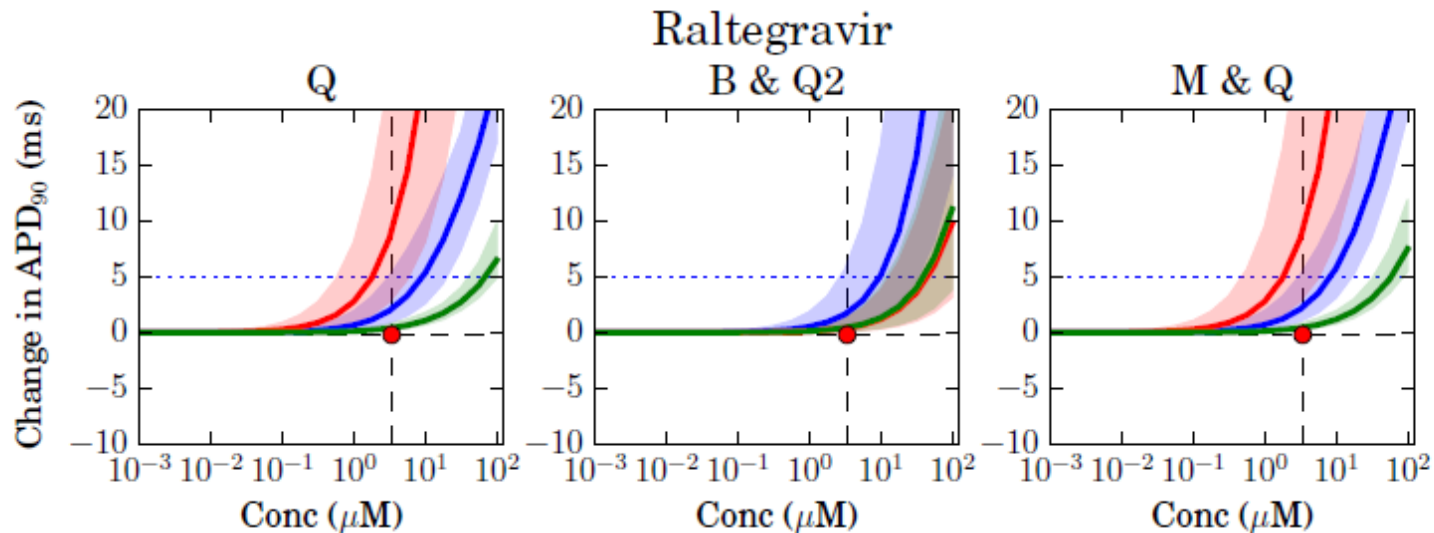

*Mirams et al (2014) JPTM*

# Modelling the interpretation?

- ❖ How do we provide guidance to the interpreter when there is uncertainty in the predictions
- ❖ Dependent upon multiple other *human* factors, such as:
  - ❖ Individual scientist or project leader,
  - ❖ Their own understanding of modelling techniques (prior exposure)
  - ❖ Project motivations
- ❖ E.g. For Case study 2, what should the project have done?

# 3D heart modelling

- ❖ These model systems assume that emergent properties will be predicted when considering the physiological environment
- ❖ But which is represented and how should we interpret such results?

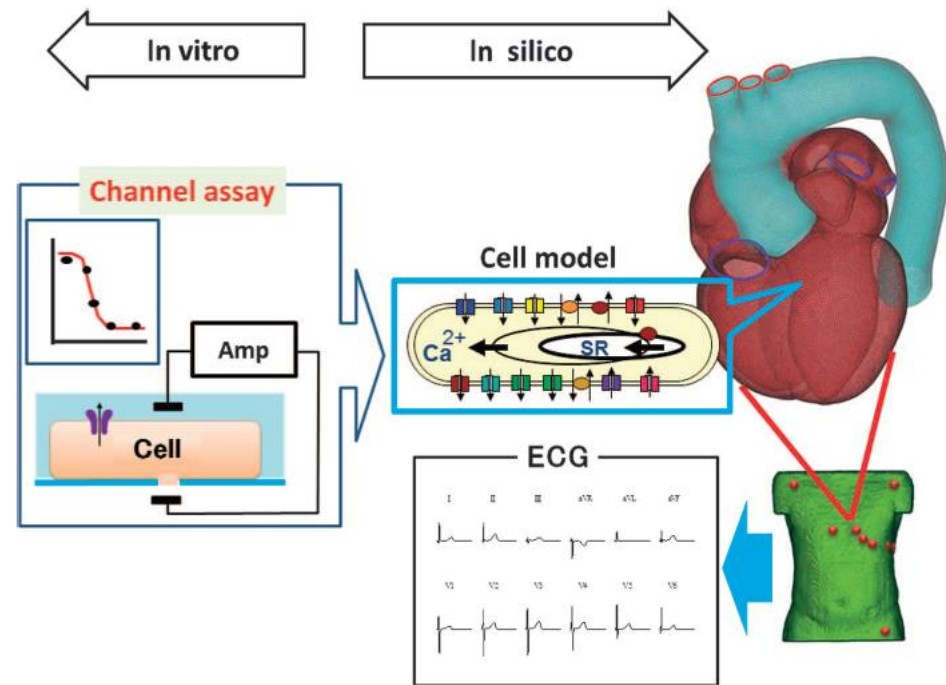

Okada et al (2015) Sci Adv

# Example of semi-mechanistic (black box) model

$$S_x = 1 - \frac{1}{1 + \left(\frac{IC_{50}}{[D]}\right)^n}$$

- ❖ Q. Which compounds will show cardiac risk, which ones will not?
- ❖ The underlying mechanisms are unknown

$$Z = \frac{1 + a_0 S_{CaL} + a_1 S_{Na}}{1 + a_2 S_{Kr}}$$

| Data-set<br>Binary Test Question (Yes/No)  | Sensitivity% |                | Specificity% |                | Balanced Accuracy% |                |
|--------------------------------------------|--------------|----------------|--------------|----------------|--------------------|----------------|
|                                            | This model   | Original model | This model   | Original model | This model         | Original model |
| <b>Human 1</b><br>Torsade de Pointes Risk  | 97           | 97             | 91           | 83             | 94                 | 90             |
| <b>Human 2</b><br>Torsade de Pointes Risks | 93           | 100            | 97           | 97             | 95                 | 98.5           |
| <b>Human 3</b><br>QTc Prolongation         | 57           | 50             | 90           | 85             | 73.5               | 67.5           |
| <b>Rabbit</b><br>Prolongation              | 96           | 72             | 73           | 81             | 84.5               | 66.5           |
| <b>Rabbit</b><br>Shortening                | 50           | 31             | 87           | 80             | 67.5               | 60             |
| <b>Dog</b><br>Prolongation                 | 67           | 60             | 84           | 76             | 75.5               | 68             |
| <b>Dog</b><br>Shortening                   | 67           | 48             | 78           | 87             | 72.5               | 67.5           |

Better metrics are highlighted in green. Worse metrics are highlighted in red.

Mistry et al (2015) Front. Pharmacol.

# So which should we use?

- ❖ ‘Simple’ Statistical/QSP models: Kramer/Mistry/Cardiotox Predictor
- ❖ Mechanistically detailed ‘QSP’ models?
  - ❖ But which one, evaluate all is a tricky task in itself:
- ❖ 3D models (UT-Heart/Predict)
- ❖ Modular approach (Certara CSS)

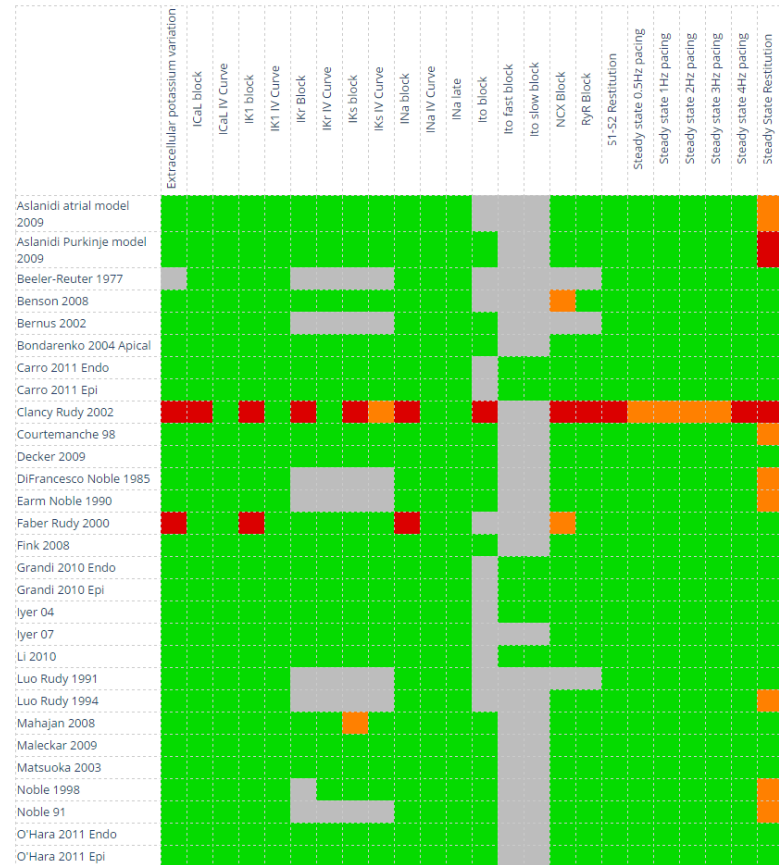

<https://travis.cs.ox.ac.uk/FunctionalCuration/db.html>



**External environment**

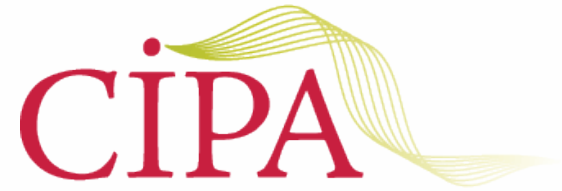

## What is CiPA

- ❖ HESI Mission: Engage scientists from academia, government and industry to identify and resolve global health and environmental issues.
- ❖ Of which the Cardiac Safety Technical Committee proposes a new paradigm for a *mechanistic* assessment of proarrhythmia that is not measured exclusively by potency of hERG block and not at all by QT prolongation
- ❖ CIPA initiative will ultimately require the modification or replacement of the existing ICH S7a/b guidelines and elimination of E14 guidelines
- ❖ CIPA *could* eliminate the need for a TQT study for compounds entering clinical development, based upon on the assessment in the proposed studies:
  - ❖ 1. *In vitro* drug effects on multiple cardiac ion channels (currently 7 proposed)
  - ❖ 2. *In silico* reconstruction of electrical effects
  - ❖ 3. *In vitro* drug effects on human stem-cell derived cardiomyocytes



# What are the options and what opportunities

- ❖ Clear desire to extensively evaluate compounds (ongoing and over next 12-18 months), both *in silico* and *in vitro*
- ❖ CiPA have therefore published a list of 29 compounds covering different cardiac safety risk categories that will result in a community driven screening and evaluation against a core set of compounds
- ❖ The data generated by this initiative could be used to support new/existing models for the translational challenges<sup>†</sup> and safety evaluation of drugs.
  - ❖ Standardizing/reproducibility of ion channel screening
  - ❖ *In silico* model selection, calibration and evaluation exercises, (however O'Hara model is a preferred candidate)
  - ❖ Stem cell study sensitivity/robustness
- ❖ But we wish to avoid data being available only by way of conference/ journal article PDF tables!

<sup>†</sup> – e.g. from Gintant presentation - [http://www.cardiac-safety.org.php53-3.ord1-1.websitetestlink.com/wp-content/uploads/2014/12/3.-CiPA-Overview-Workstreams-Gintant-Rechanneling\\_Dec-11-2014\\_FINAL.pdf](http://www.cardiac-safety.org.php53-3.ord1-1.websitetestlink.com/wp-content/uploads/2014/12/3.-CiPA-Overview-Workstreams-Gintant-Rechanneling_Dec-11-2014_FINAL.pdf)



---

## **Data sets and Evaluation**

## Previous *in silico* assessments have not studied a consistent set of compounds

| Study                  | Compounds in common with at least 1 other study <sup>a</sup> | No. unique <i>in silico</i> study compounds | Compounds common to CiPA list <sup>b</sup> |
|------------------------|--------------------------------------------------------------|---------------------------------------------|--------------------------------------------|
| Mirams 2014 (39 cmpds) | 11                                                           | 28                                          | 1                                          |
| Kramer 2013 (55 cmpds) | 28                                                           | 27                                          | 20                                         |
| Davies 2012 (53 cmpds) | 6                                                            | 47                                          | 5                                          |
| Mirams 2011 (31 cmpds) | 18                                                           | 13                                          | 13                                         |

<sup>a</sup> 7 compounds have appeared in more than 2 studies, amiodarone, cisapride, dofetilide, nifedipine, pimozide, quinidine and terfenadine. No compounds have been used in every study.

<sup>b</sup> 8 compounds (azimilide, clarithromycin, domperidone, metoprolol, ondansetron, ranolazine, tamoxifen, vandetanib) from the CiPA list have not previously been the subject of an *in silico* cardiac study.

Davies et al (2016) Drug Discovery Today (in press)

# Consequences of different compound sets

- ❖ Different compounds used for these studies means comparison across in silico tools is difficult
- ❖ The composition of the compound sets heavily influences the model performance

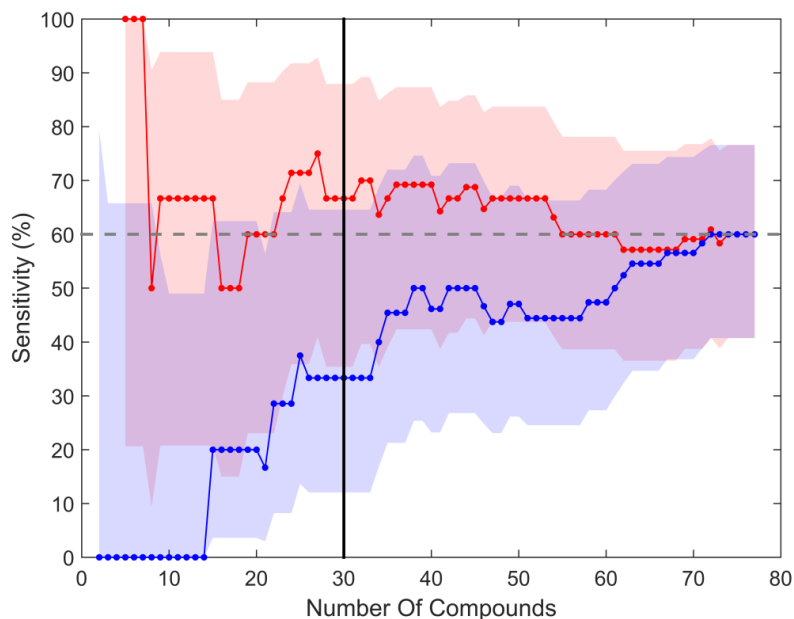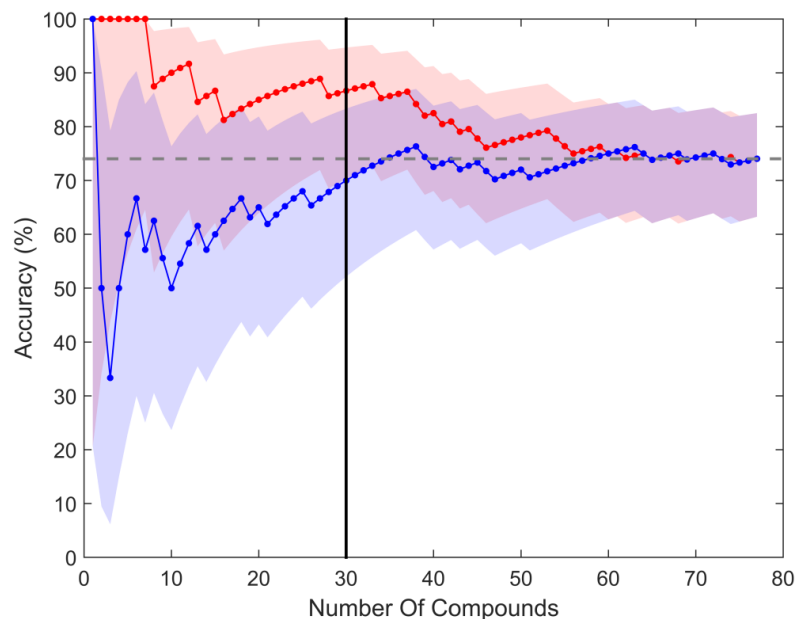

*Davies et al (2016) Drug Discovery Today (in press)*

# Improved data sharing would allow more joined-up/translational model evaluation

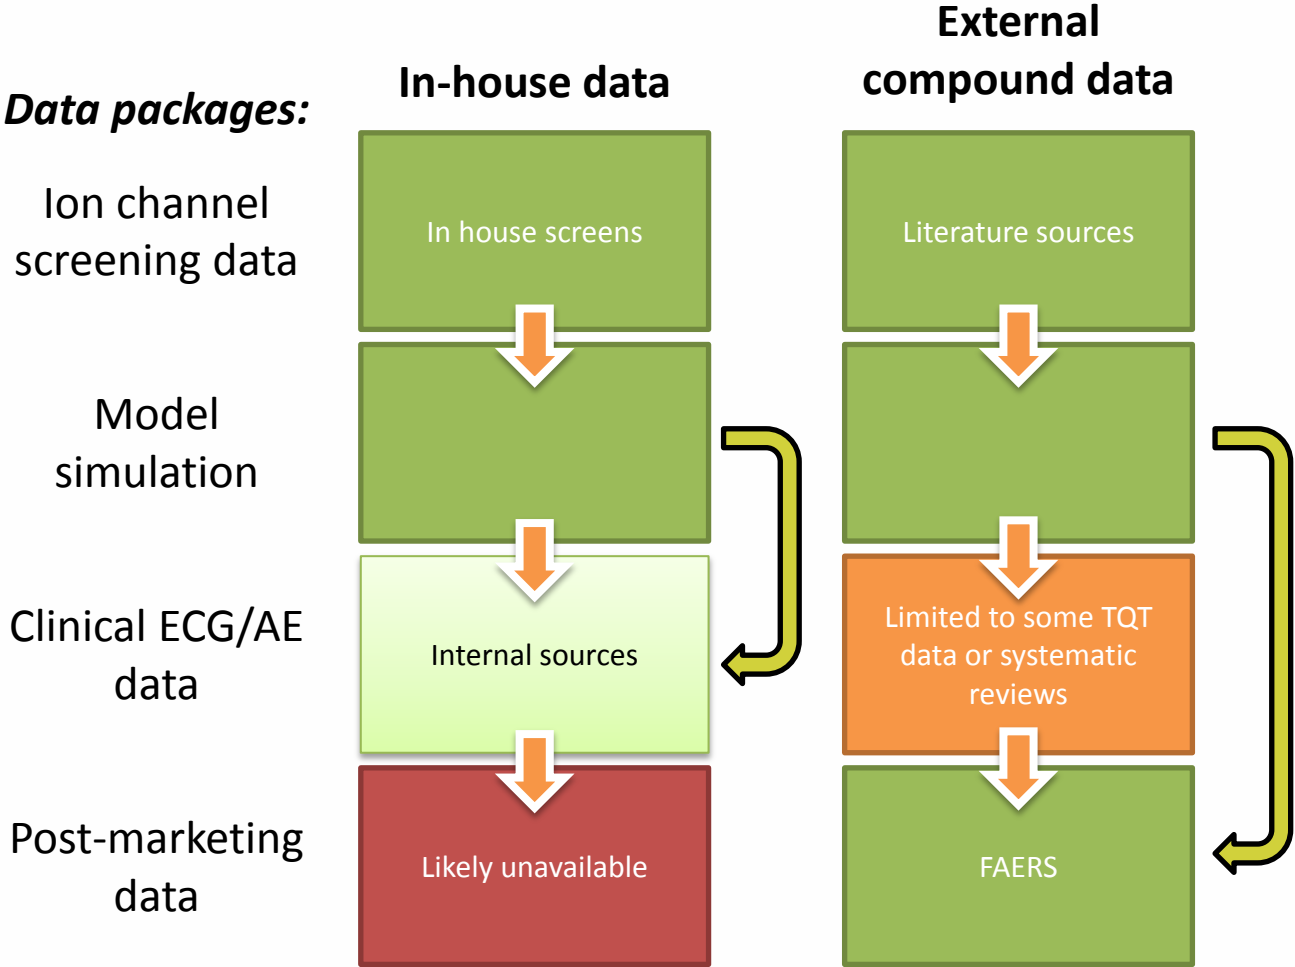

# What do we do with the results

- ❖ Does the score have the final say?
- ❖ We need to think about this up front?
- ❖ What if we don't like the results!!

# Before setting out on evaluating our models we need to consider the consequences?

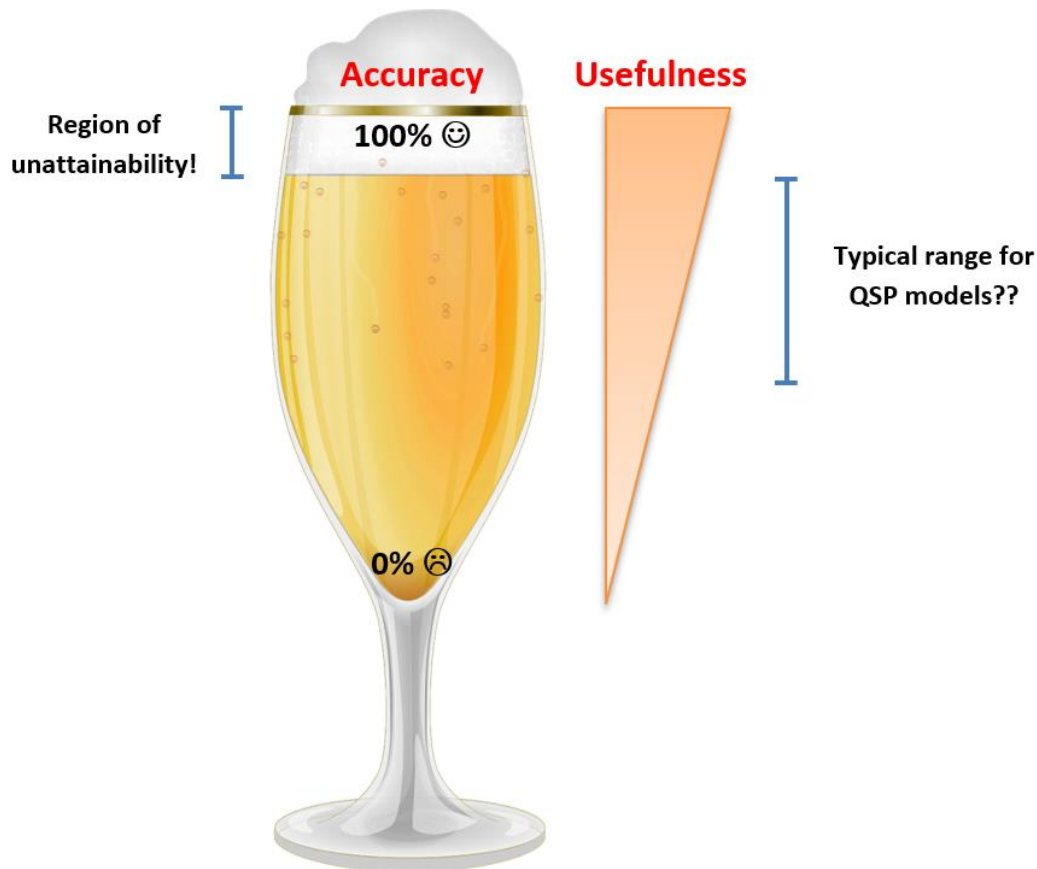

# Before setting out on evaluating our models we need to consider the consequences?

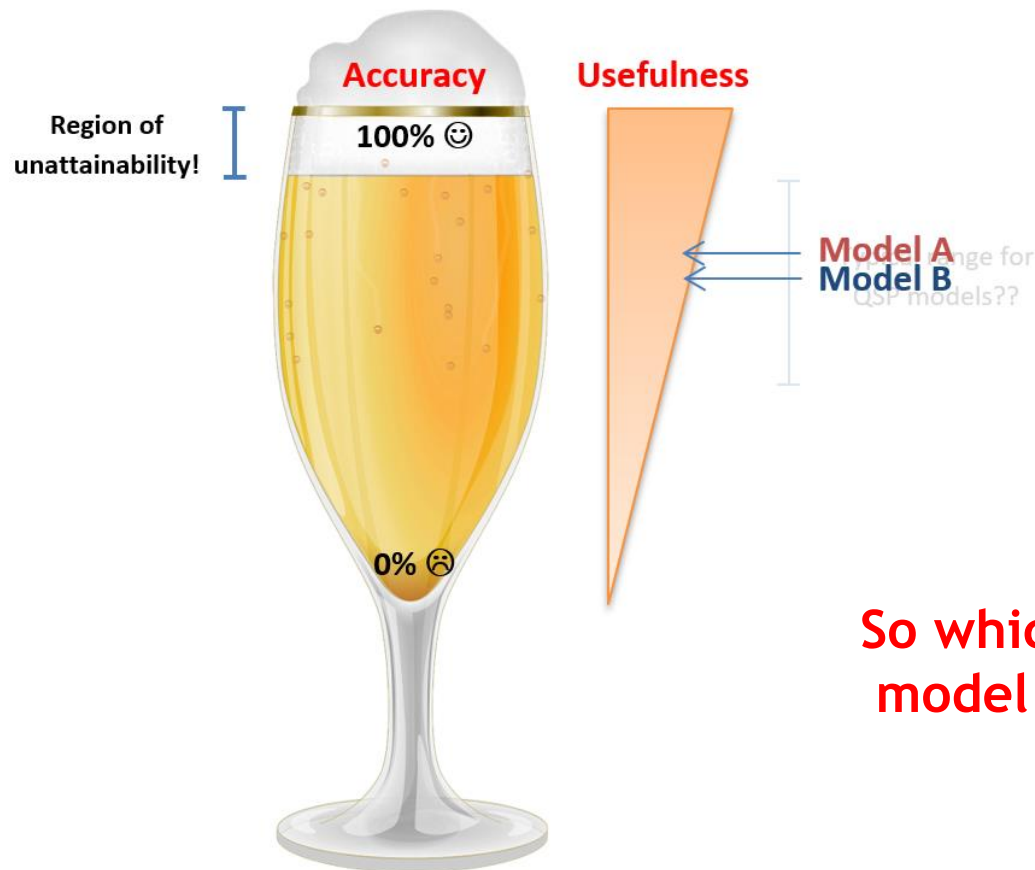

So which is the model to use?



# Deciding which model to choose?

- ❖ In fact there are many, many models rather than just A and B
- ❖ What if model A (the higher scoring model) was actually an older (rabbit) model and model B was the 'preferred' (human) model?
- ❖ Does credibility of the model (i.e. underlying data, maturity) mitigate for a slightly lower accuracy?
- ❖ Which is more important, prediction accuracy or confidence in the model structure?
- ❖ How much should we consider the onward user – e.g. attempt to define a rule set for supporting onward decision making



---

## Summary

## Summary and Questions:

- ❖ In the cardiac field we not only have different modelling types (and scales) to choose from but also a multitude of different structural (and differentially parameterised) models
- ❖ Choosing the representative model(s) is tricky and requires evaluation
- ❖ A carefully designed and tailored set of compounds and outcomes are essential for a reasonable evaluation of these models for the purpose of decision making
- ❖ Consideration for the outcomes of an evaluation is important in advance to reduce potential bias
- ❖ Can we go back (supposing the score directs us) from more physiologically detailed models?
- ❖ Can different granular models peacefully co-habit?
- ❖ Should mechanism based models be used as a black box model?

## Reminder: CiPA initiative

- ❖ The cardiac in vitro proarrhythmia assay proposes to replace TQT studies with a combination of **in silico** (O'Hara model) and in vitro tests
- ❖ Important for 'Modelling and Simulation' to support getting this right
- ❖ Vanoxerine story: How to unpick those safe from those risky? They can look mighty similar

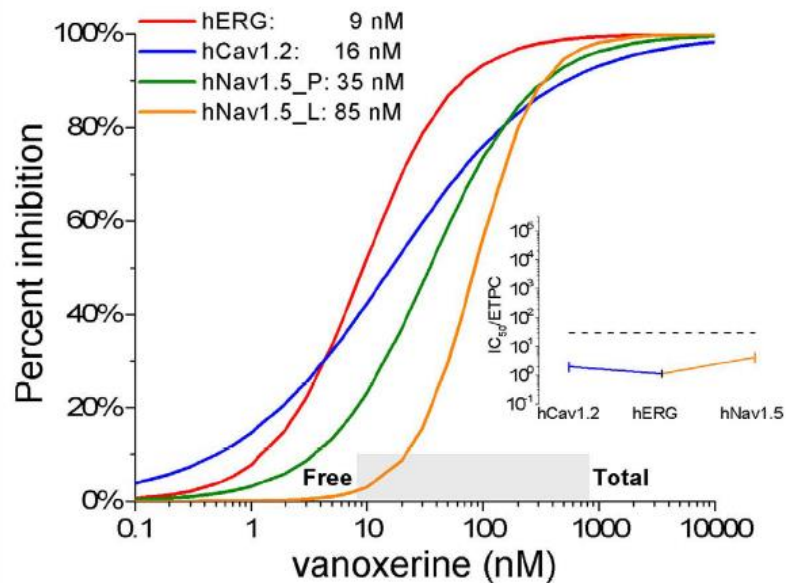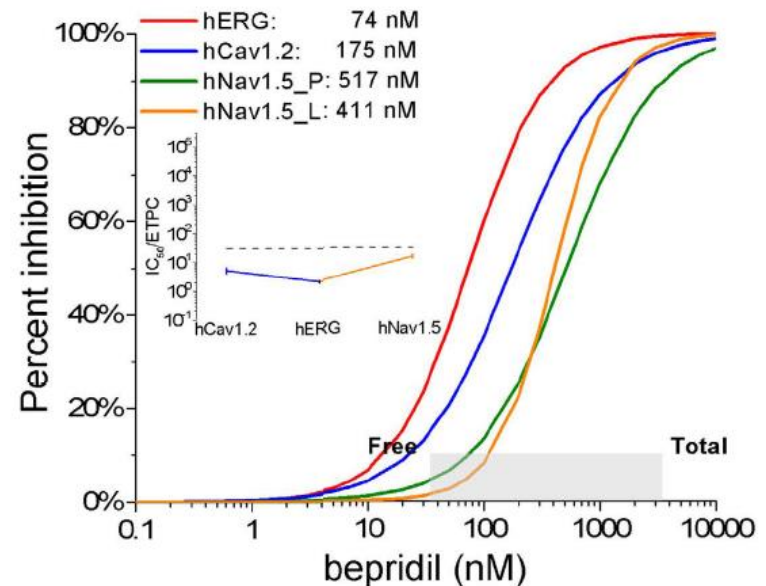

Obejero-Paz et al (2015) Sci. Rep.

# The (Financial) Modelers' Hippocratic Oath

- ❖ I will remember that I didn't make the world, and it doesn't satisfy my equations.
- ❖ Though I will use models boldly to estimate value, I will not be overly impressed by mathematics.
- ❖ I will never sacrifice reality for elegance without explaining why I have done so.
- ❖ Nor will I give the people who use my model false comfort about its accuracy. Instead, I will make explicit its assumptions and oversights.
- ❖ I understand that my work may have enormous effects on society and the economy, many of them beyond my comprehension.

Emanuel Derman and Paul Wilmott, January 7 2009

<http://www.wilmott.com/blogs/eman/index.cfm/2009/1/8/The-Financial-Modelers-Manifesto>

# Acknowledgements

## **Roche:**

Ken Wang  
Liudmila Polonchuk  
Antje-Christine Walz  
Antonello Caruso  
Thierry L ave  
Hans-Peter Grimm  
Ben-Fillippo Krippendorff  
Neil Parrott  
Jonathan Mochel  
Nicolas Frances  
Stefanie Bendels  
Franz Schuler  
Thomas Singer

## **University of Oxford:**

Gary Mirams  
Blanca Rodriguez  
David Gavaghan  
Ross Johnstone  
Denis Noble  
Geoffrey Williams

## **University of Manchester:**

Hitesh Mistry

## **AstraZeneca:**

Najah Abi-Gerges  
Chris Pollard  
Jonathan Swinton

*All colleagues, present and past*

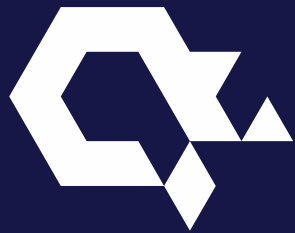

**Mark Davies PhD**

Director and Consultant

[mark.davies@qtinformatics.com](mailto:mark.davies@qtinformatics.com)

[qtinformatics.com](http://qtinformatics.com)
